# Supplementary material for: Urease inhibitory kinetics, molecular docking, SAR and ADME studies of imine analogues
Source: Royal Society of Chemistry journal article supplement (doi:10.1039/d1nj05123g), 2022-01-01
Supplement: d1nj05123g1.pdf [file d1nj05123g1.pdf]

---

**Urease inhibitory kinetics, molecular docking, SAR and ADMET studies of Imine analogues**

Syeda Uroos Qazi<sup>\*a,b</sup>, Asia Naz<sup>\*a,b</sup>, Aqeel Imran<sup>c</sup>, Jamshed Iqbal<sup>c</sup>

<sup>a</sup> Research Institute of Pharmaceutical Sciences, University of Karachi, Karachi-75270, Pakistan.

<sup>b</sup> Department of Pharmaceutical Chemistry, Faculty of Pharmacy and Pharmaceutical Sciences, University of Karachi, Karachi-75270, Pakistan.

<sup>c</sup> Centre for Advanced Drug Research, COMSATS University Islamabad, Abbottabad Campus, Abbottabad 22060, Pakistan. Electronic address: drjamshed@cuiatd.edu.pk.

---

**\*Corresponding authors:**

(Asia Naz) [asia.naz@uok.edu.pk](mailto:asia.naz@uok.edu.pk)

# Characterization data of Compound 3a:

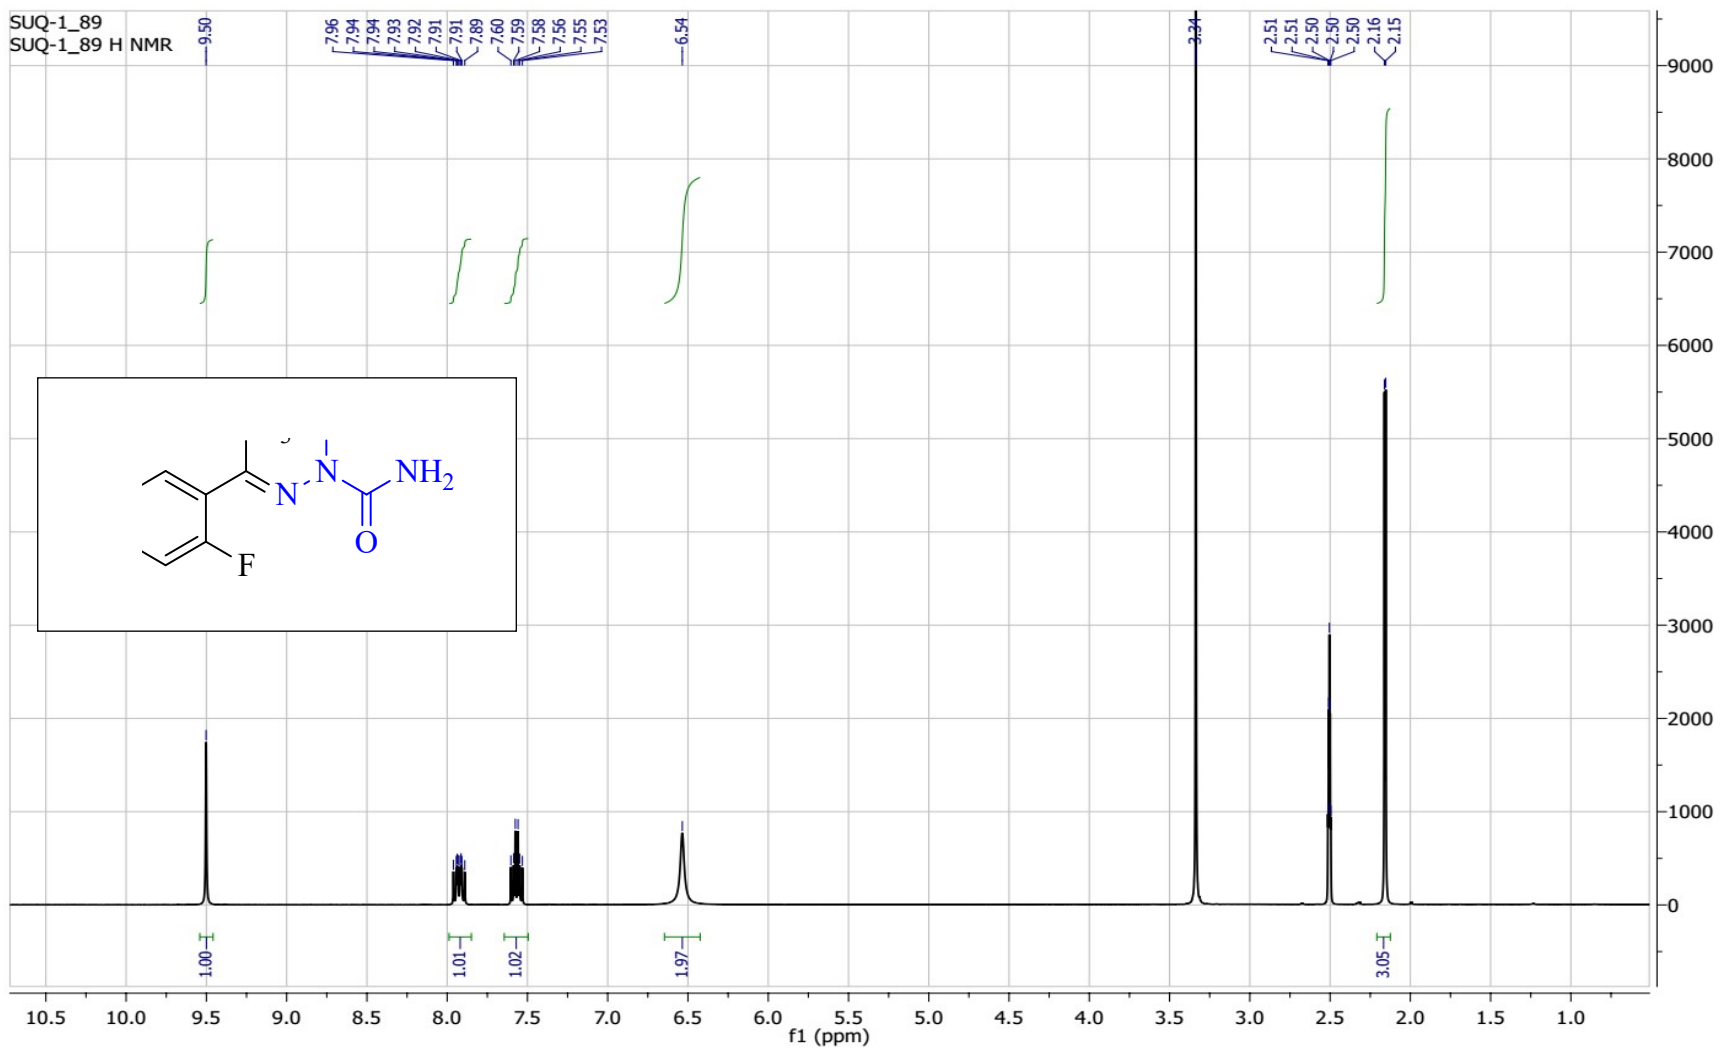

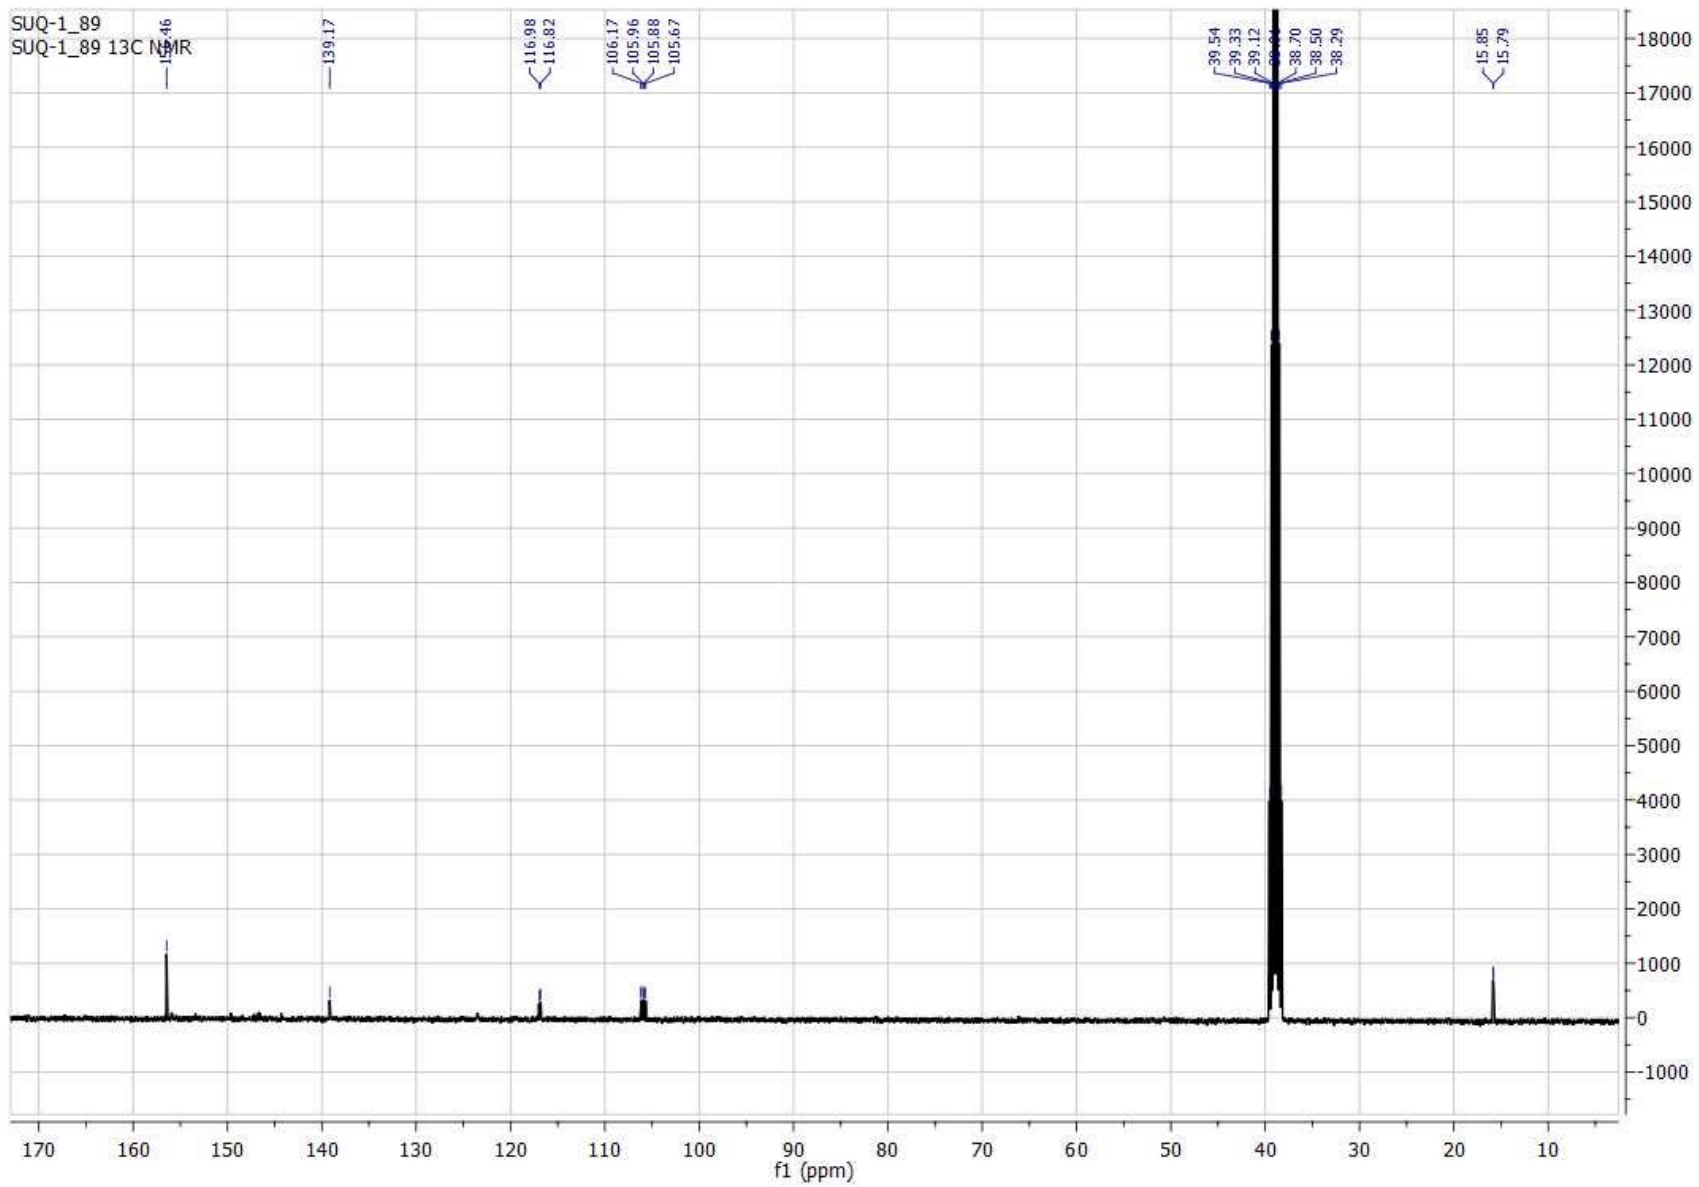

9/1/2020

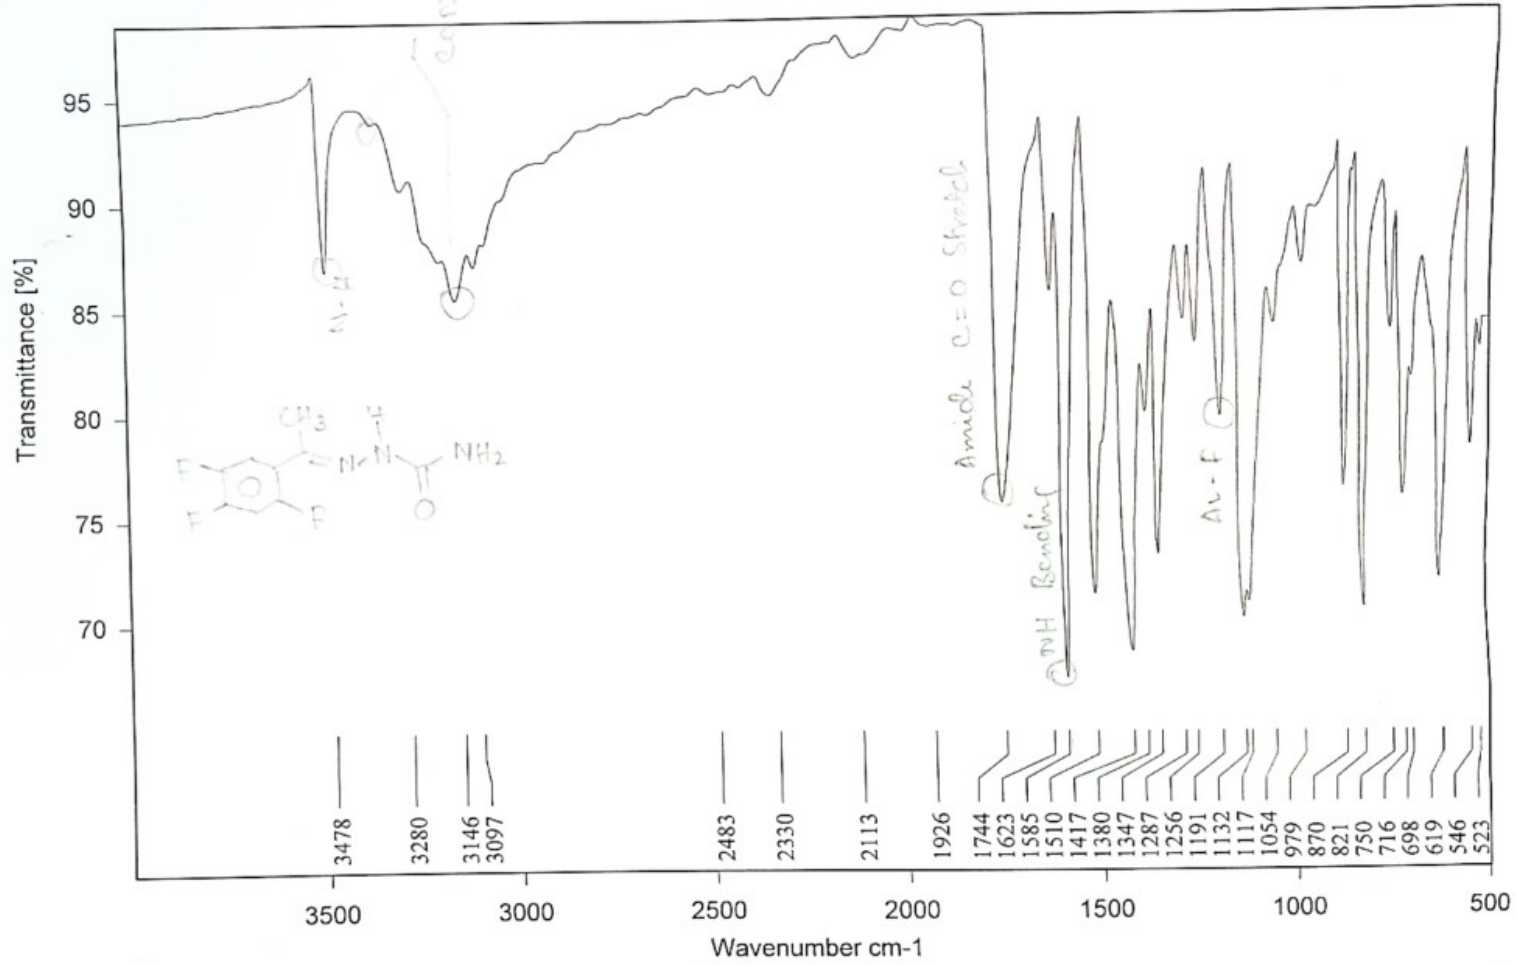

Scanned with CamScanner

|          |        |
|----------|--------|
| CODE NO. | SU-89  |
| MATERIAL | powder |

# Characterization data of Compound 3b:

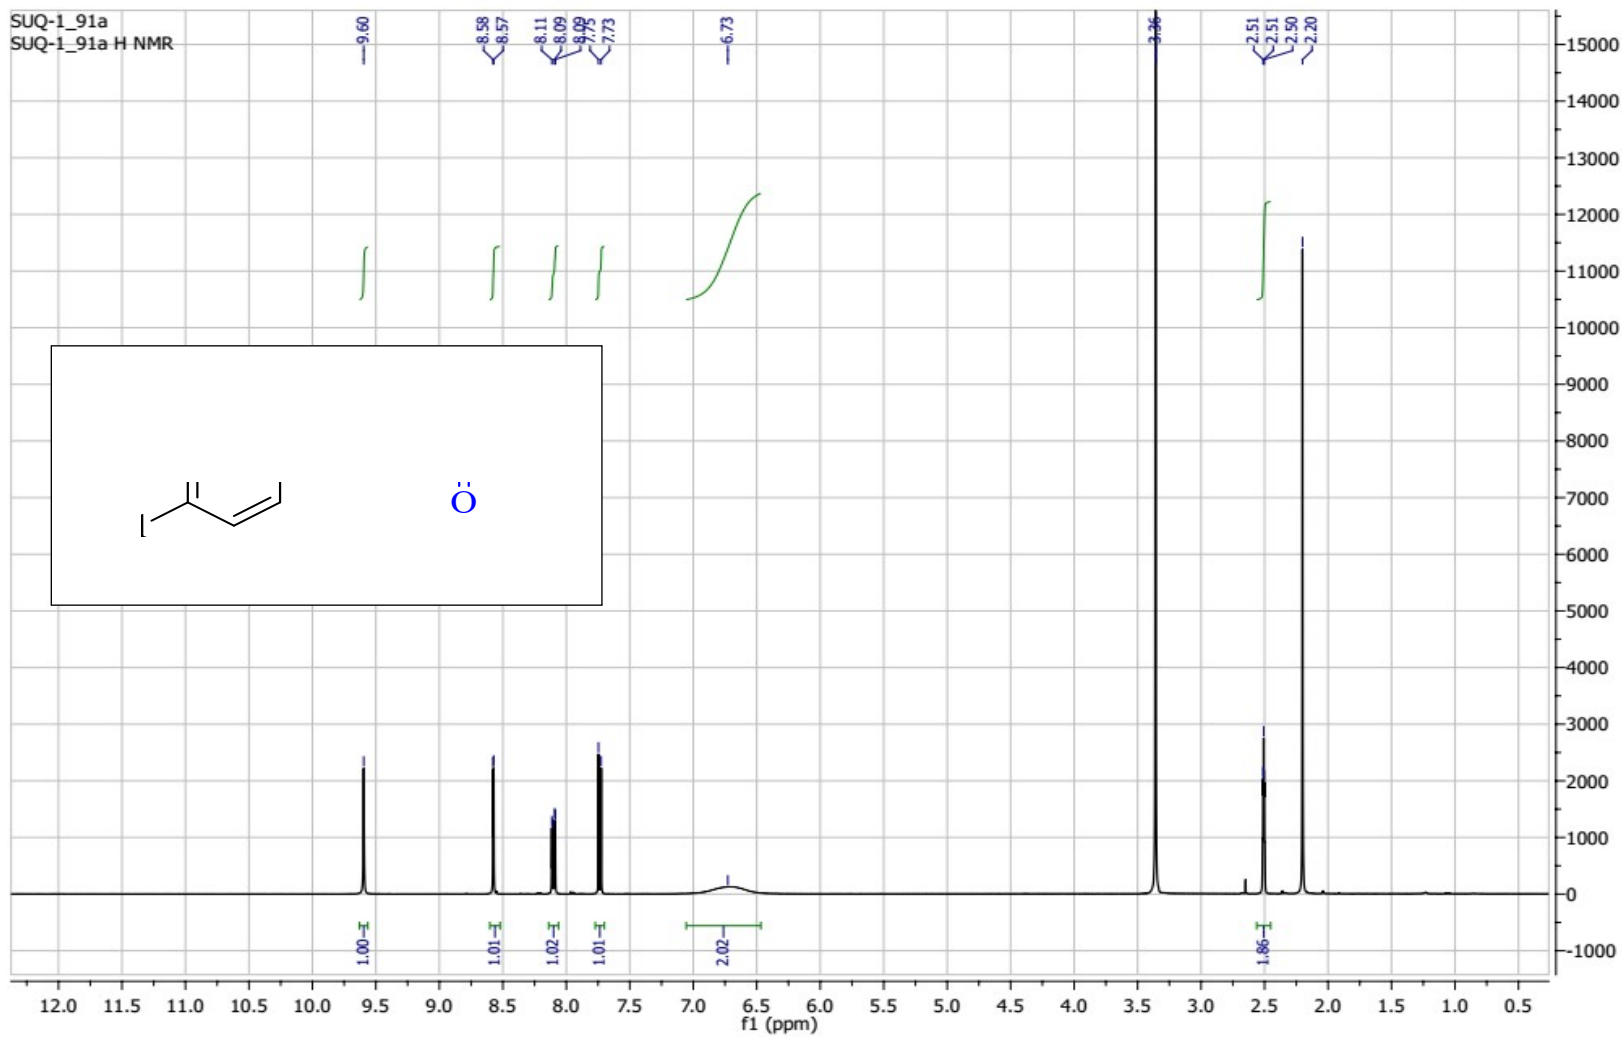

SUQ-1\_91a  
SUQ-1\_91a H NMR

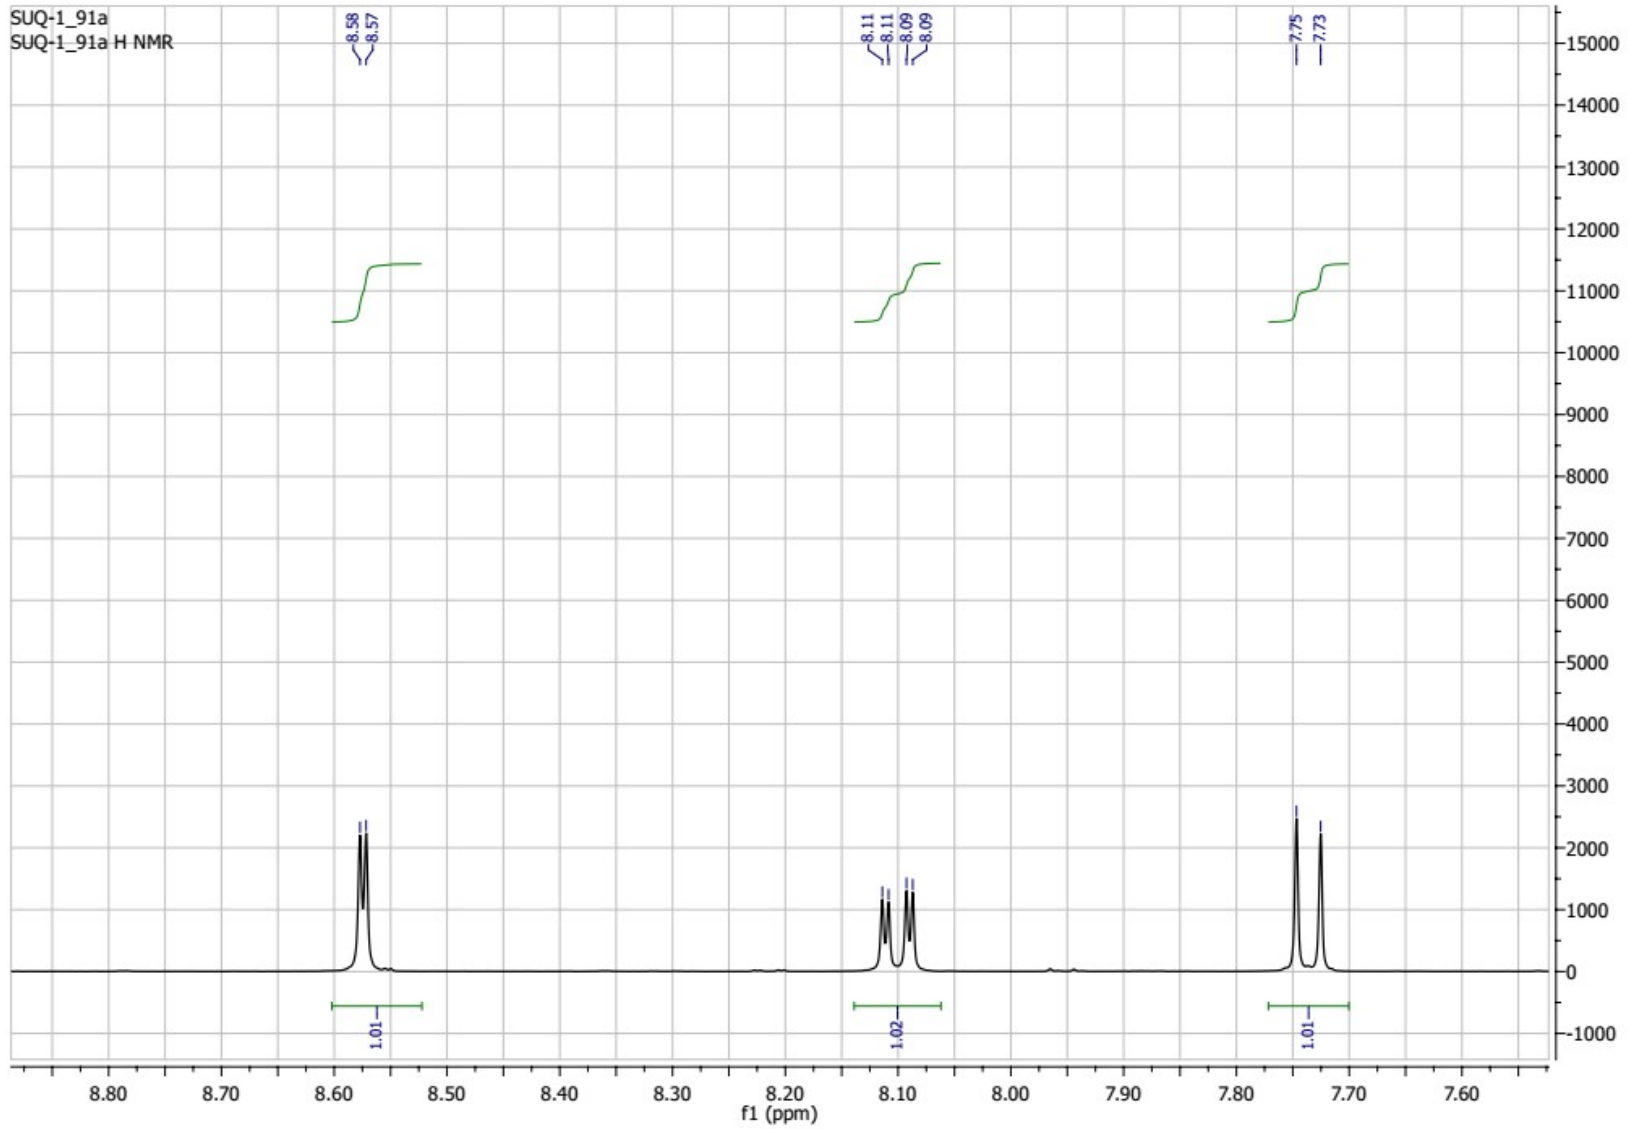

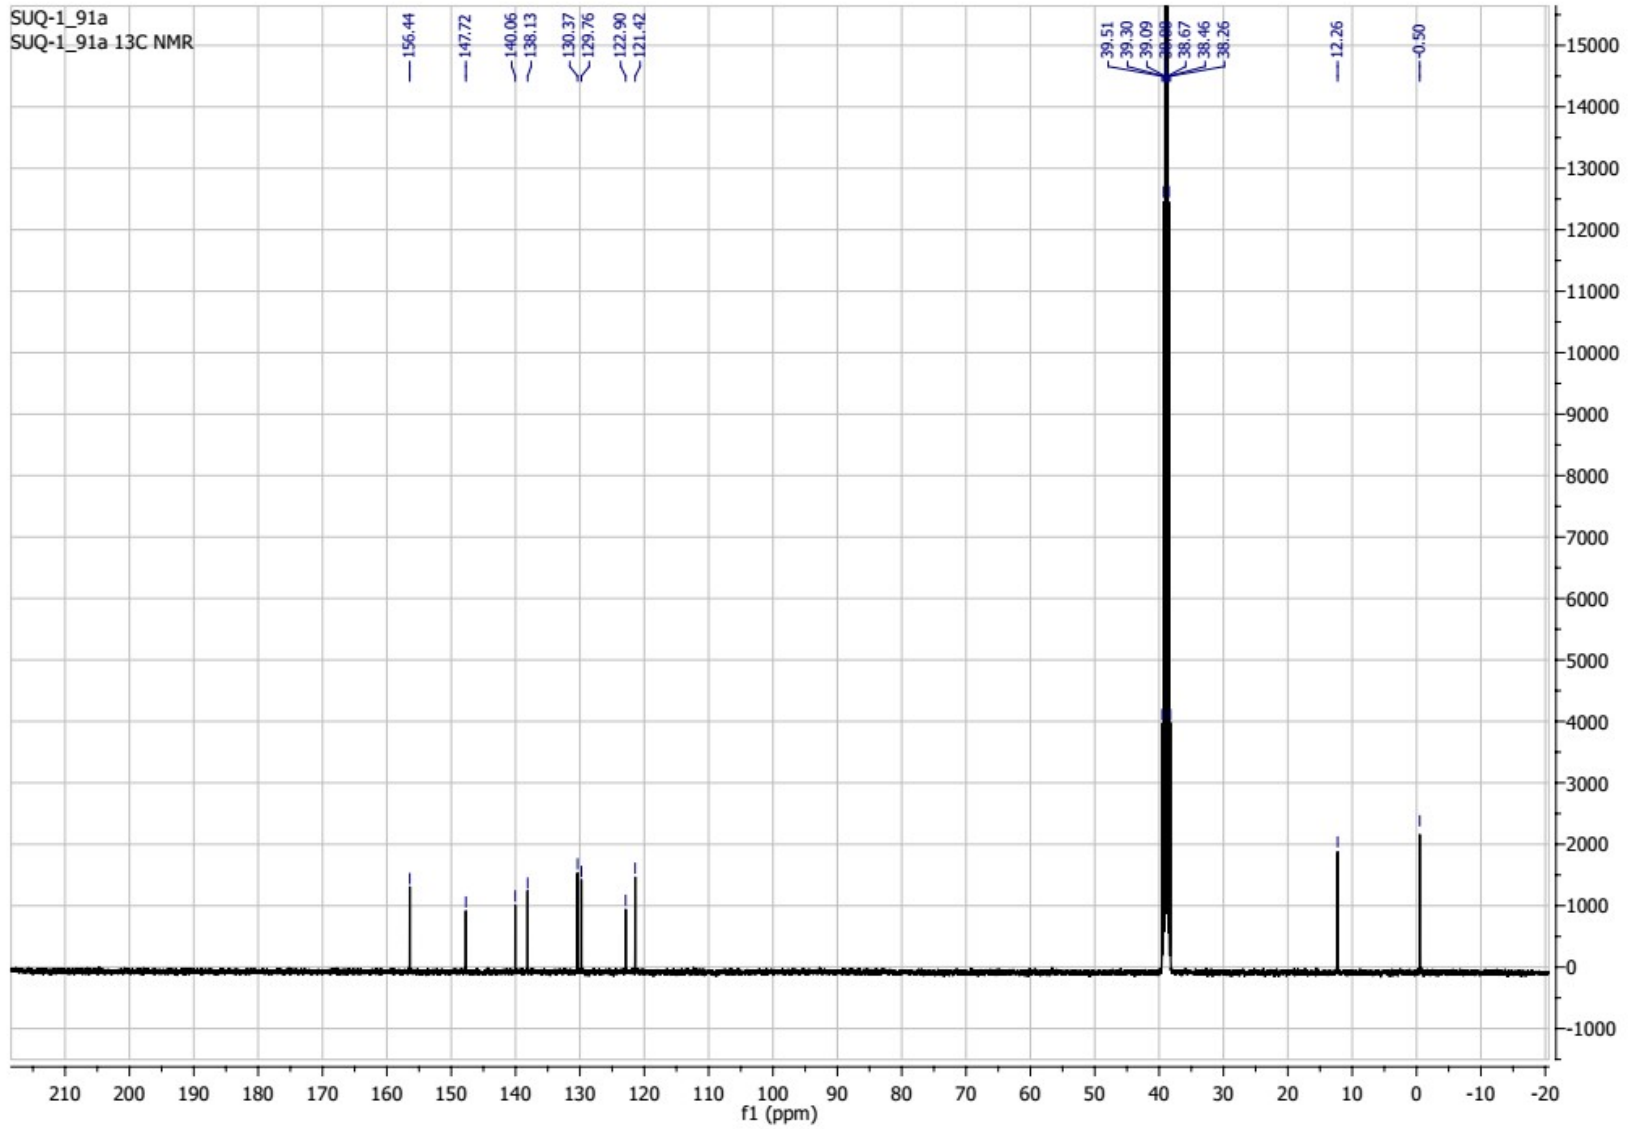

9/1/2020

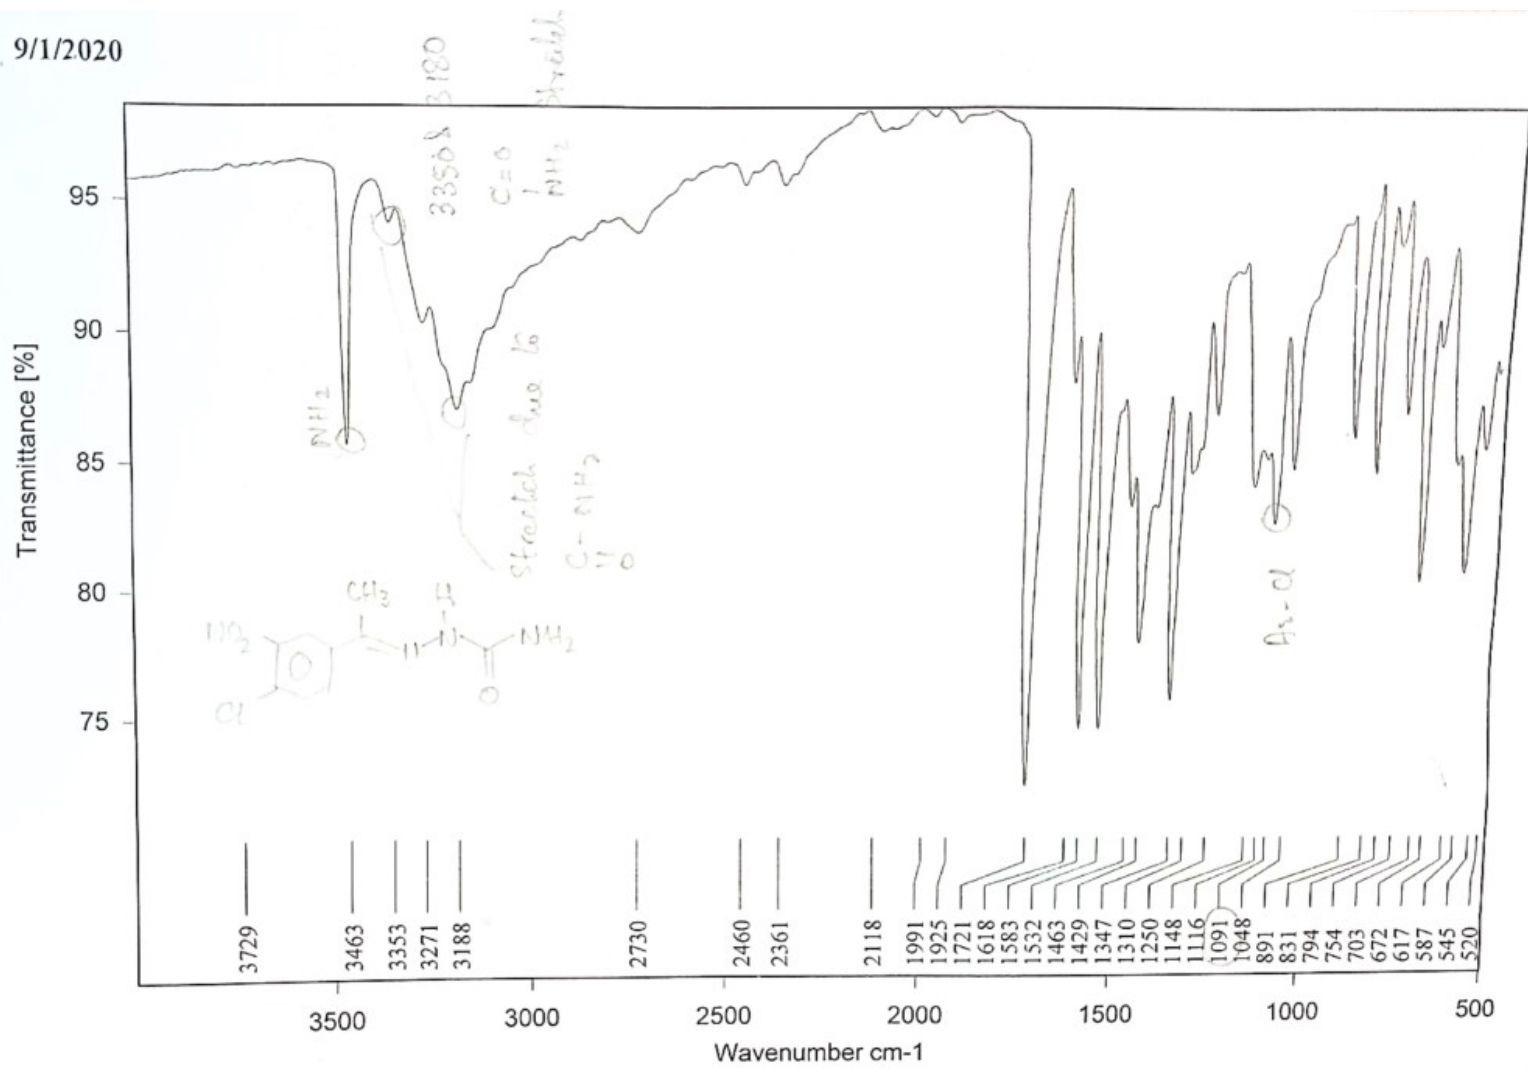

Scanned with CamScanner

|          |         |
|----------|---------|
| CODE NO. | SU-91Ca |
| MATERIAL | powder  |



# Characterization data of Compound 3c:

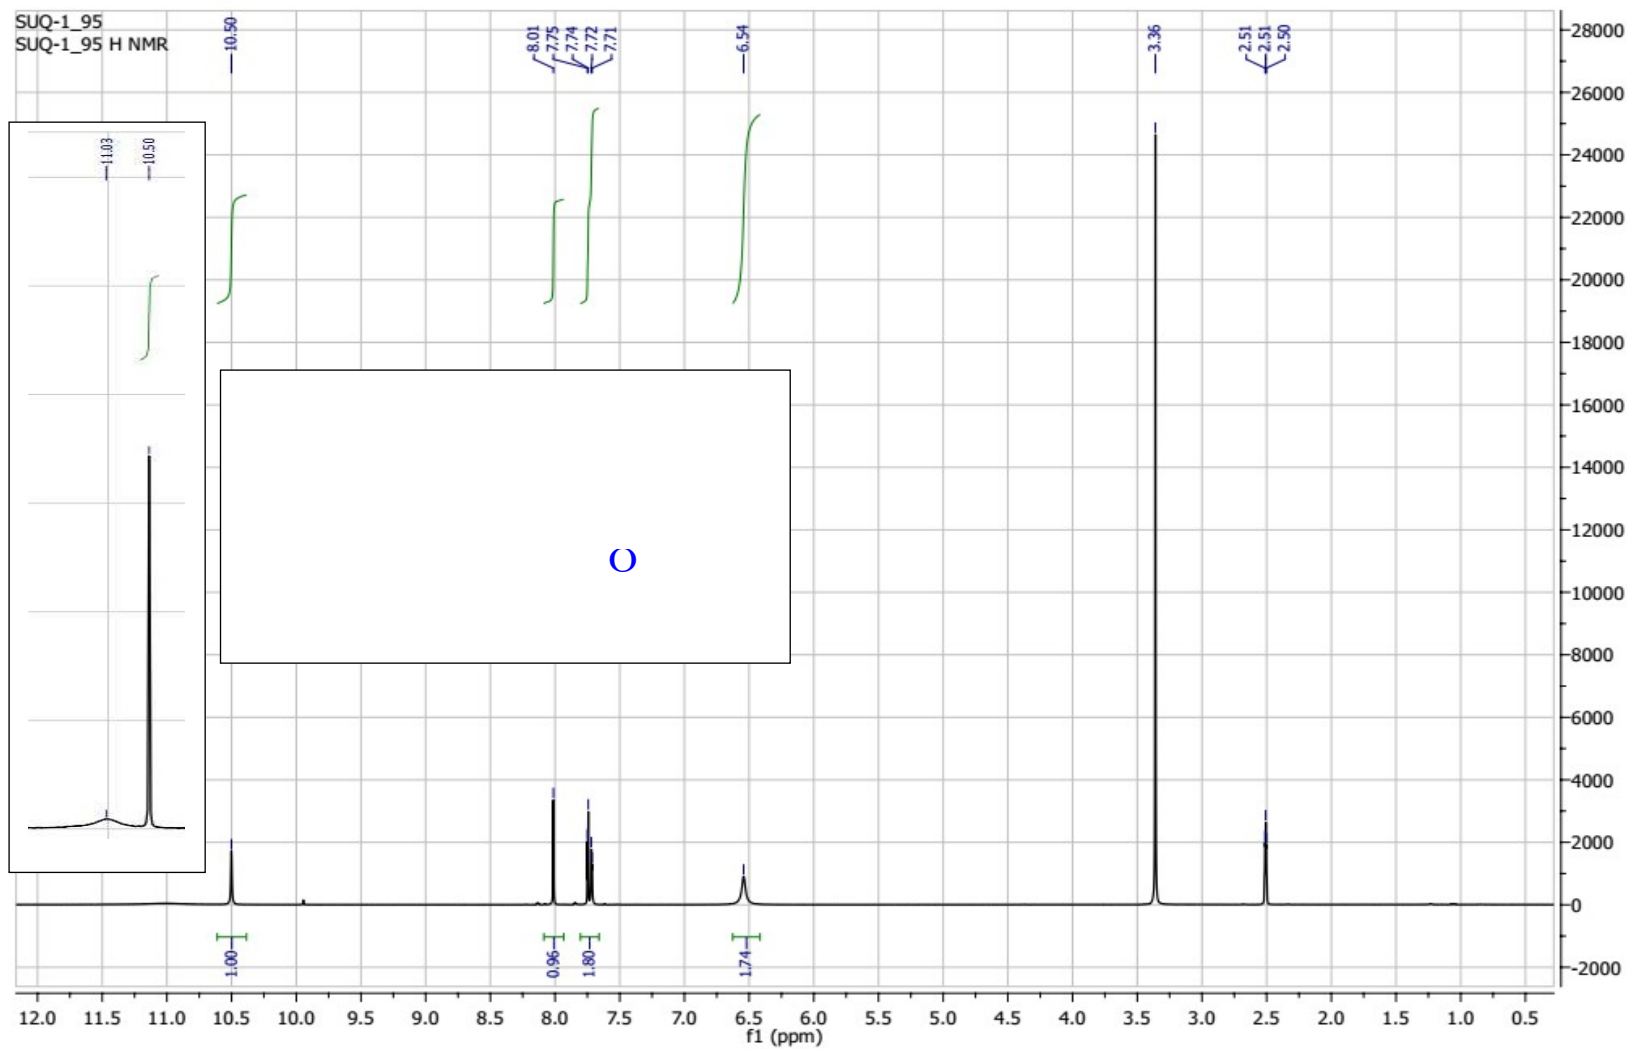

SUQ-1\_95  
SUQ-1\_95 H NMR

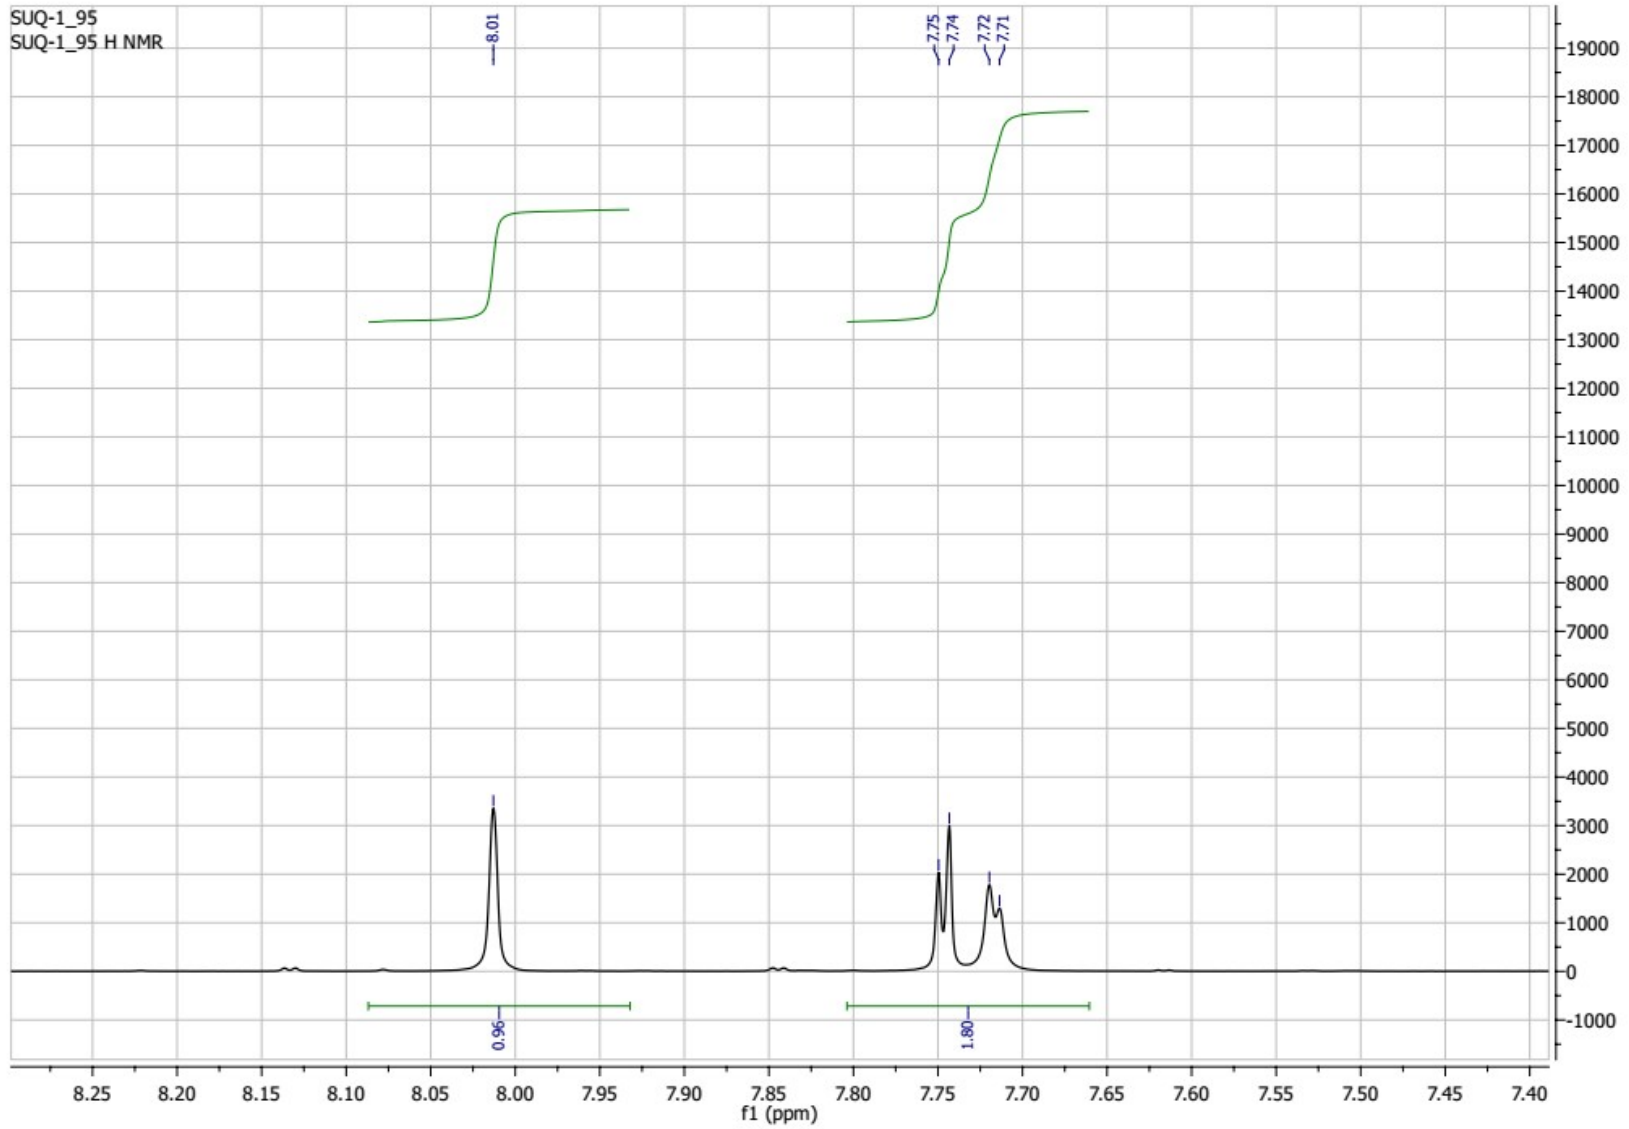

SUQ-1\_95  
SUQ-1\_95 13C NMR

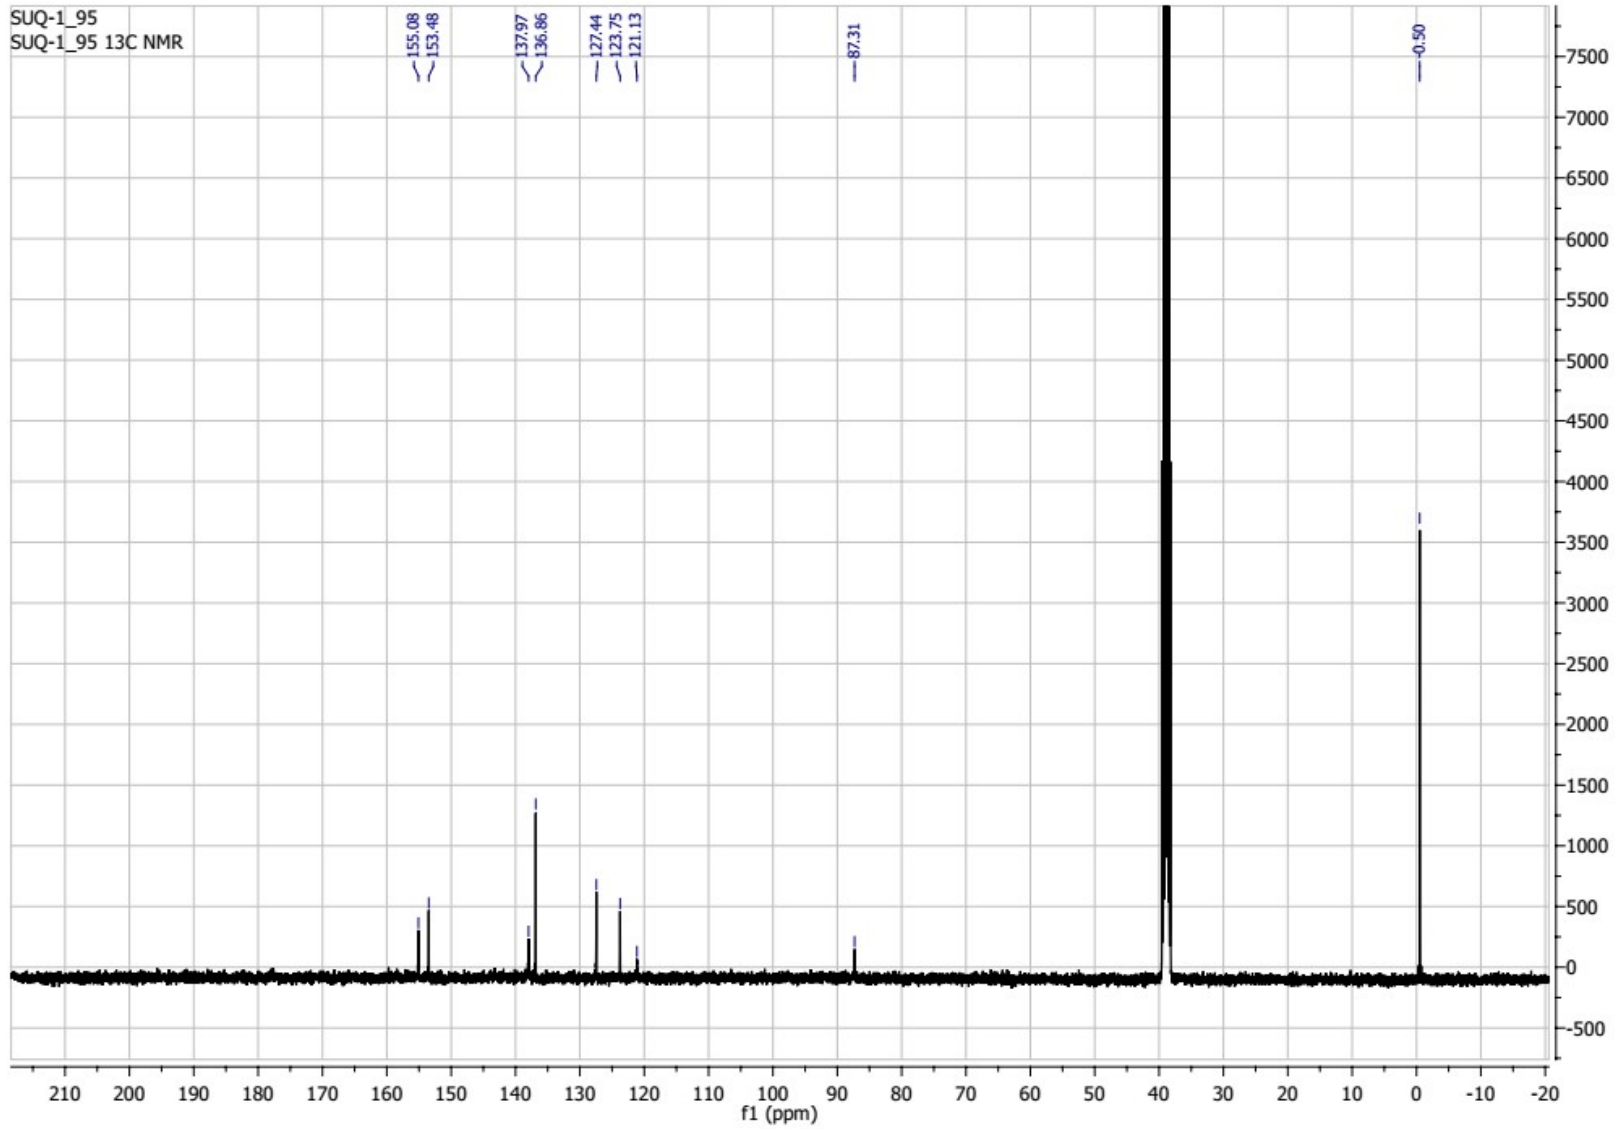

9/1/2020

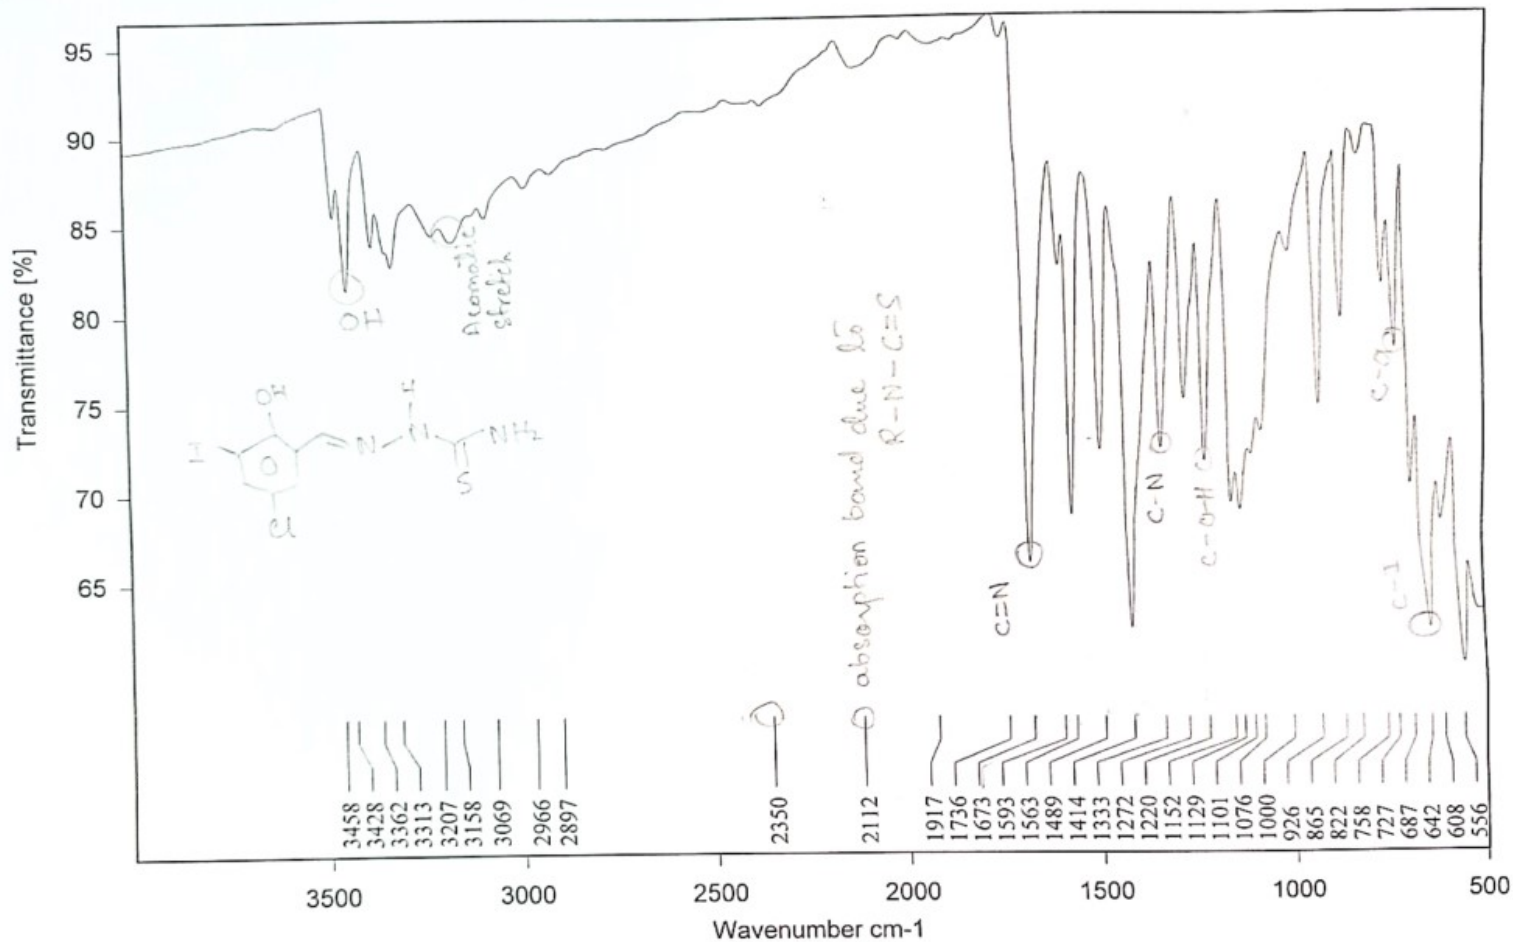

Scanned with CamScanner

|          |        |
|----------|--------|
| CODE NO. | SU-95a |
| MATERIAL | powder |

# Characterization data of Compound 3e:

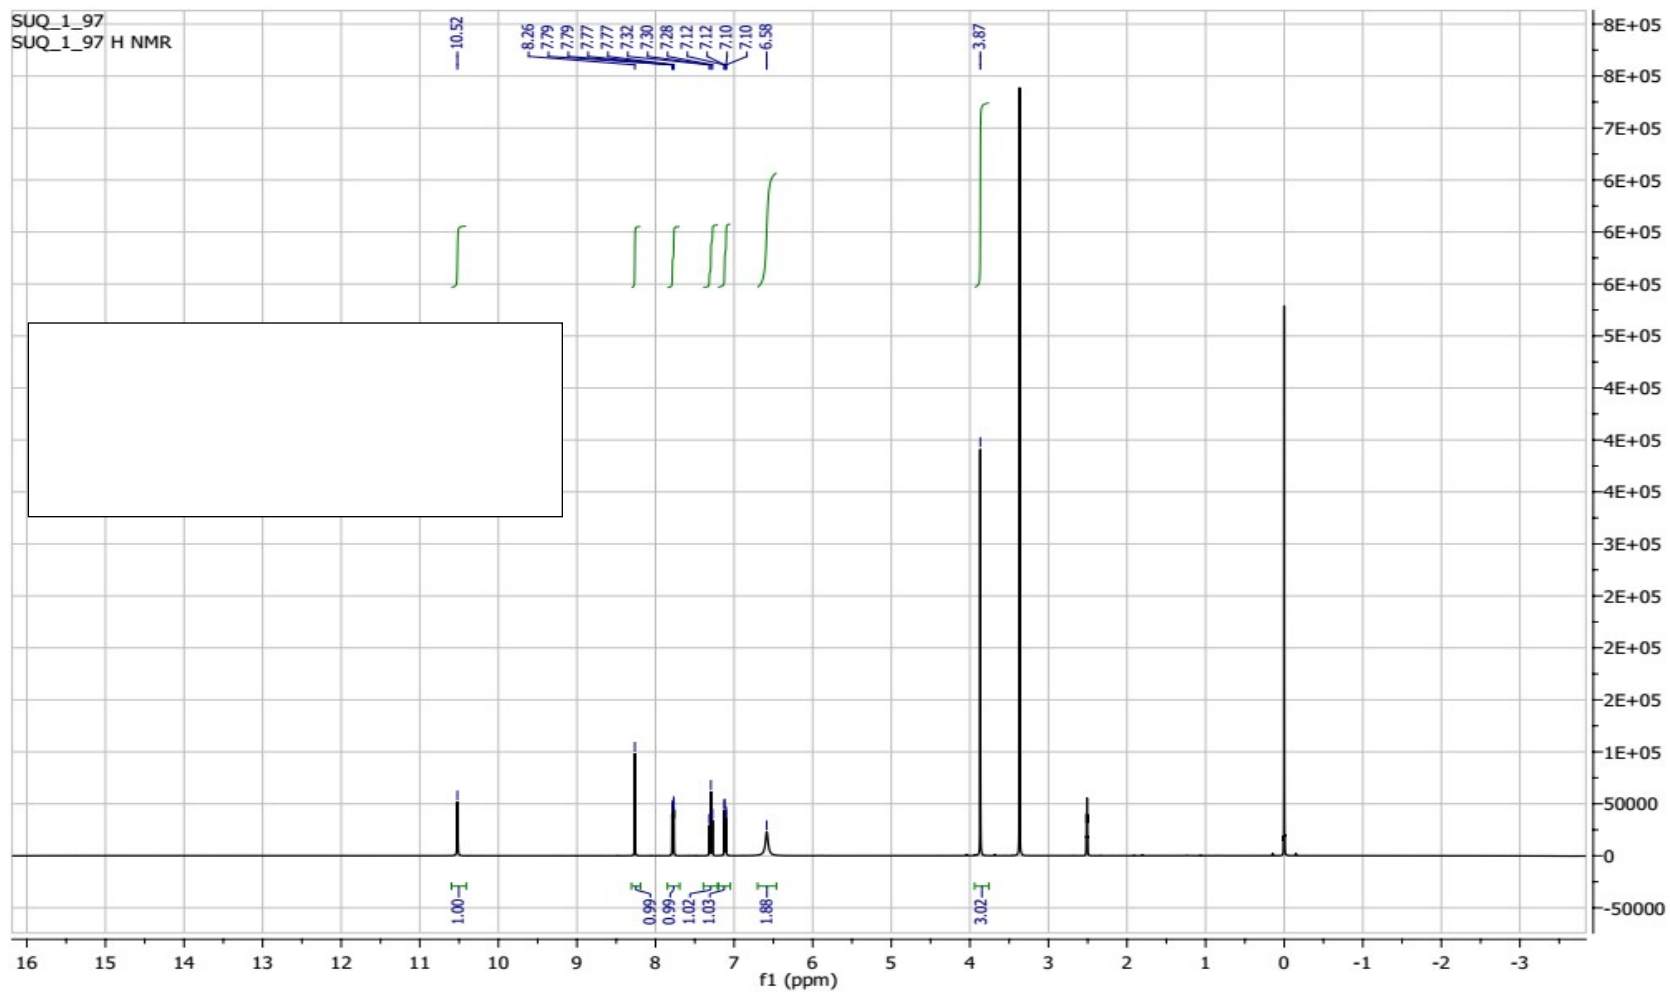

SUQ\_1\_97  
SUQ\_1\_97 H NMR

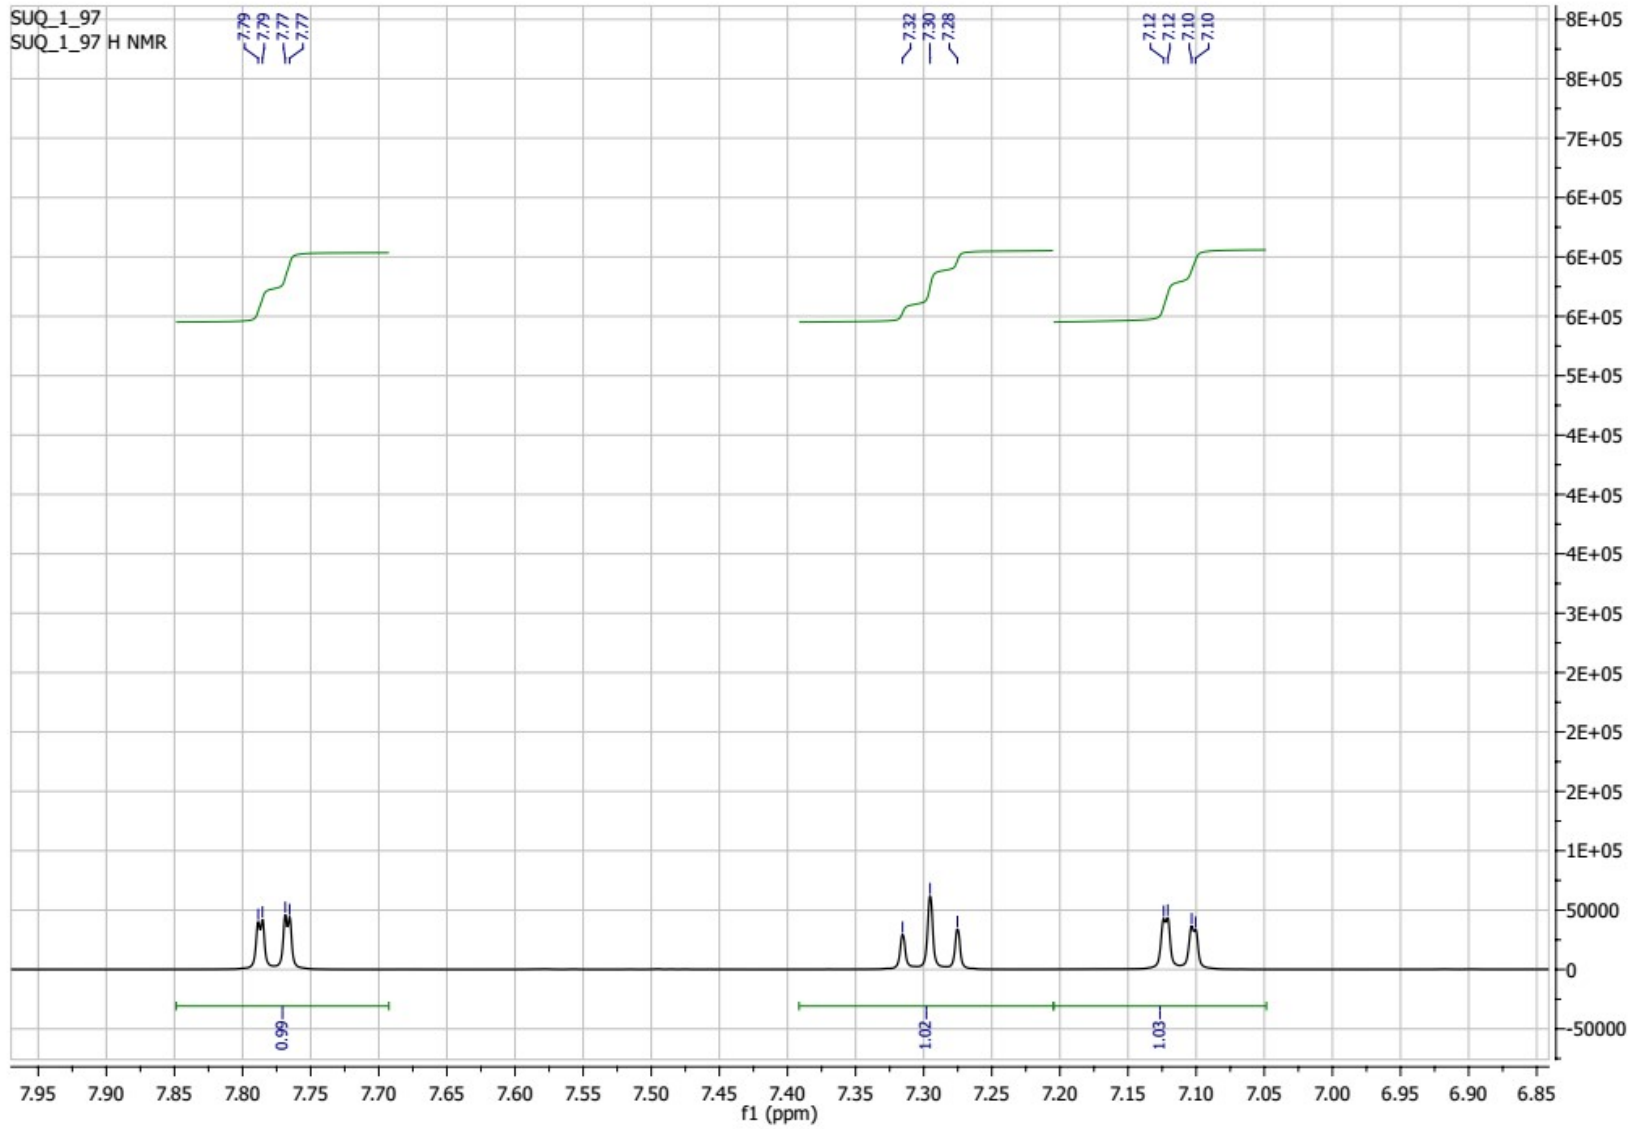

SUQ\_1\_97  
SUQ\_1\_97 13C NMR

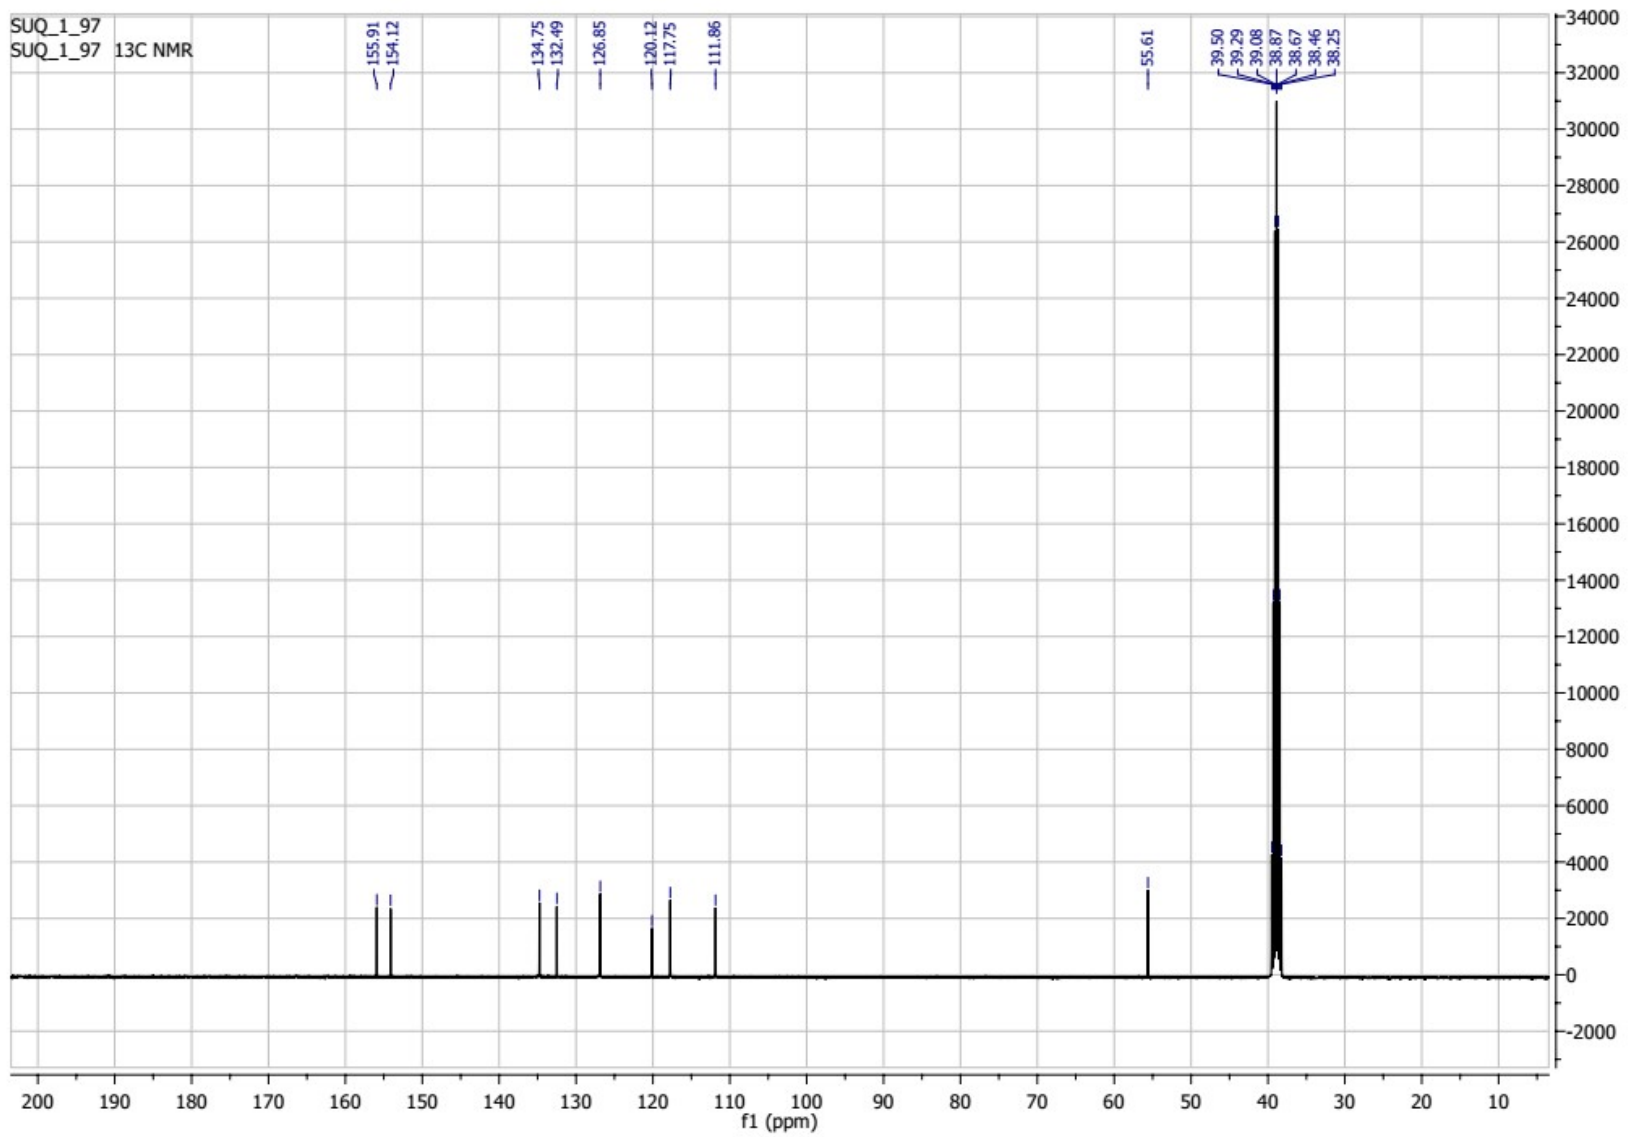

9/1/2020

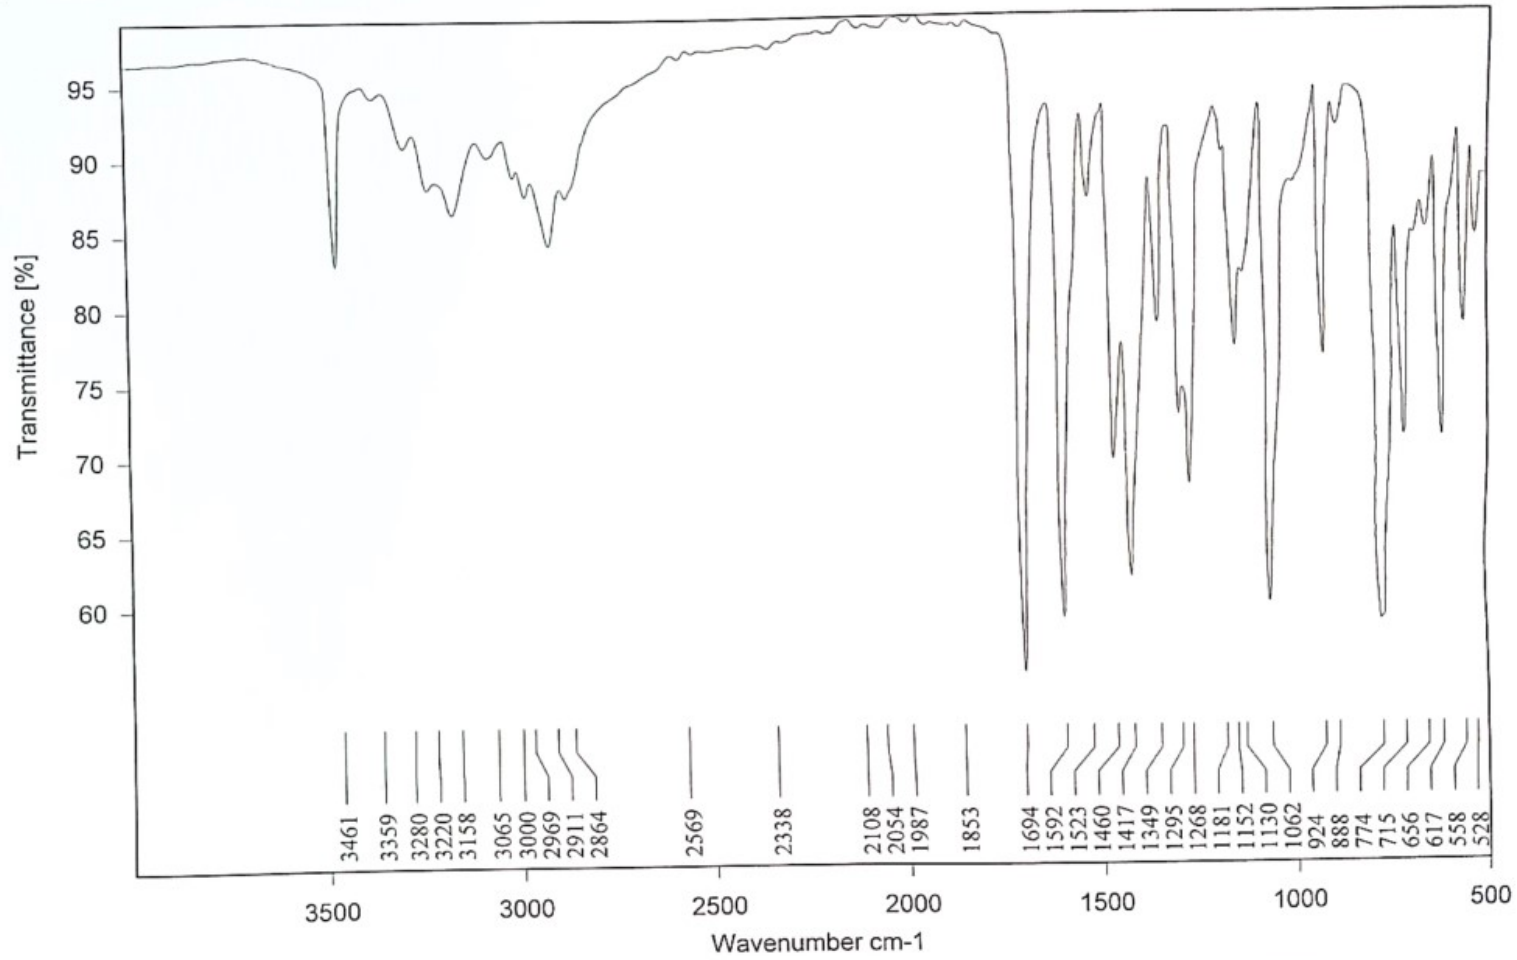

Scanned with CamScanner

|          |        |
|----------|--------|
| CODE NO. | SU-97  |
| MATERIAL | powder |



# Characterization data of Compound 3f:

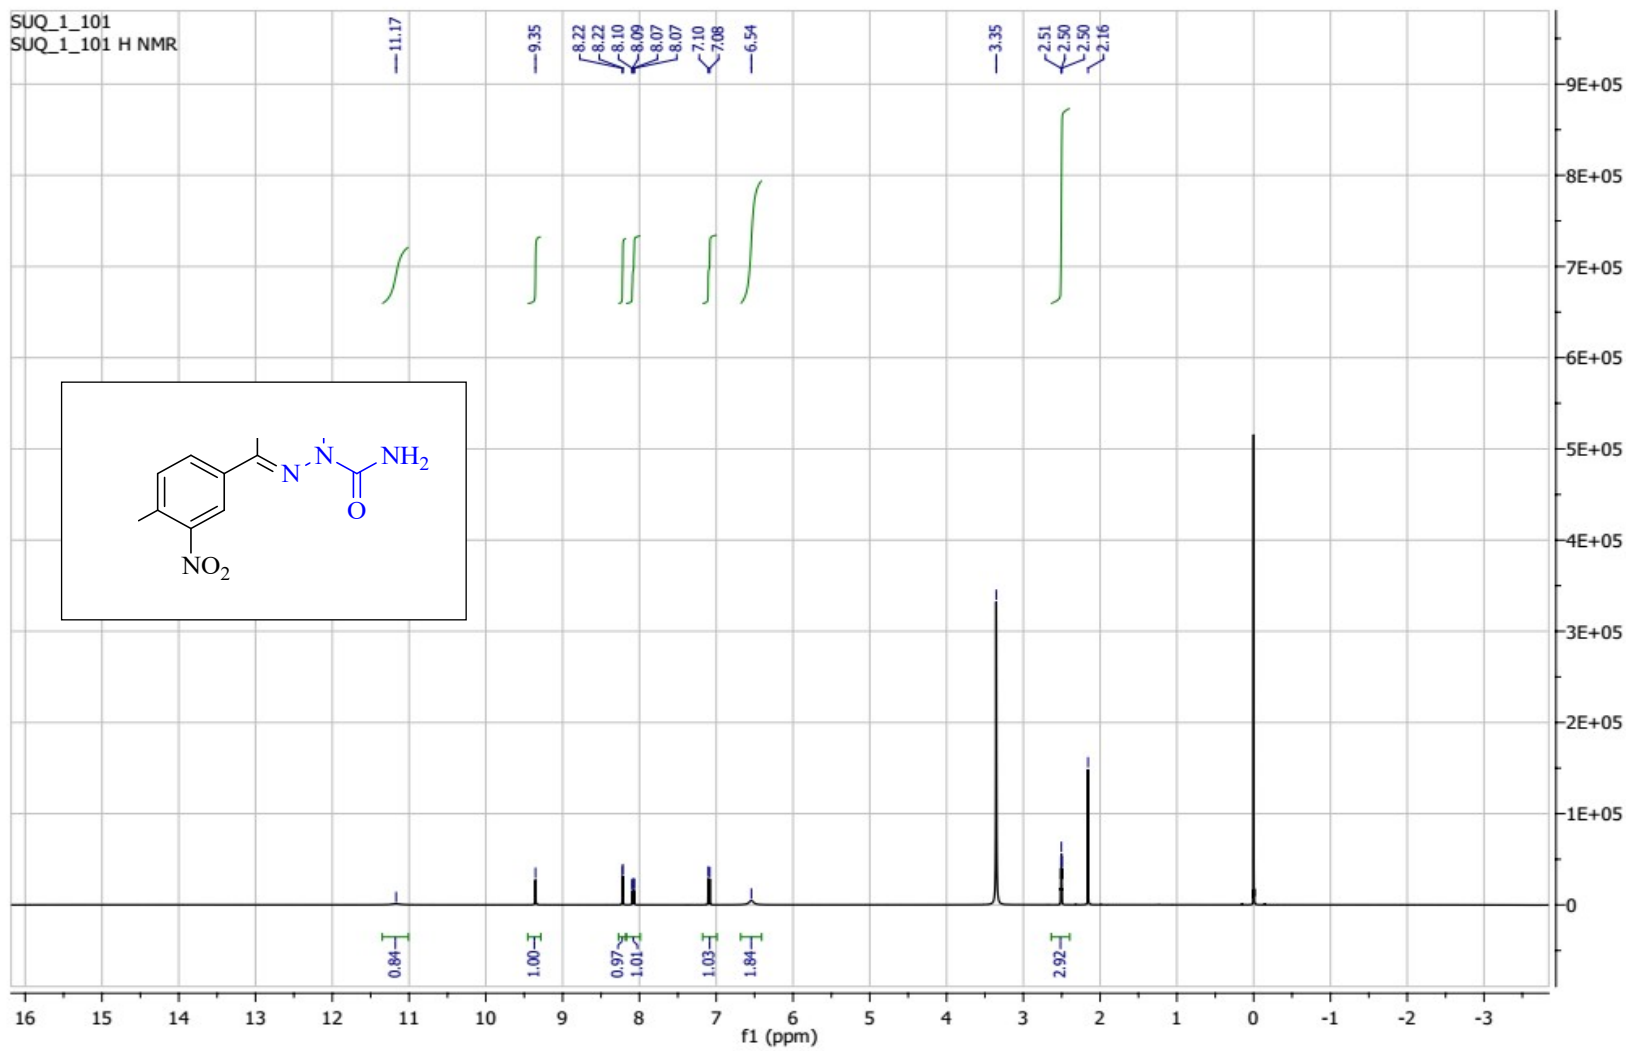

SUQ\_1\_101  
SUQ\_1\_101 H NMR

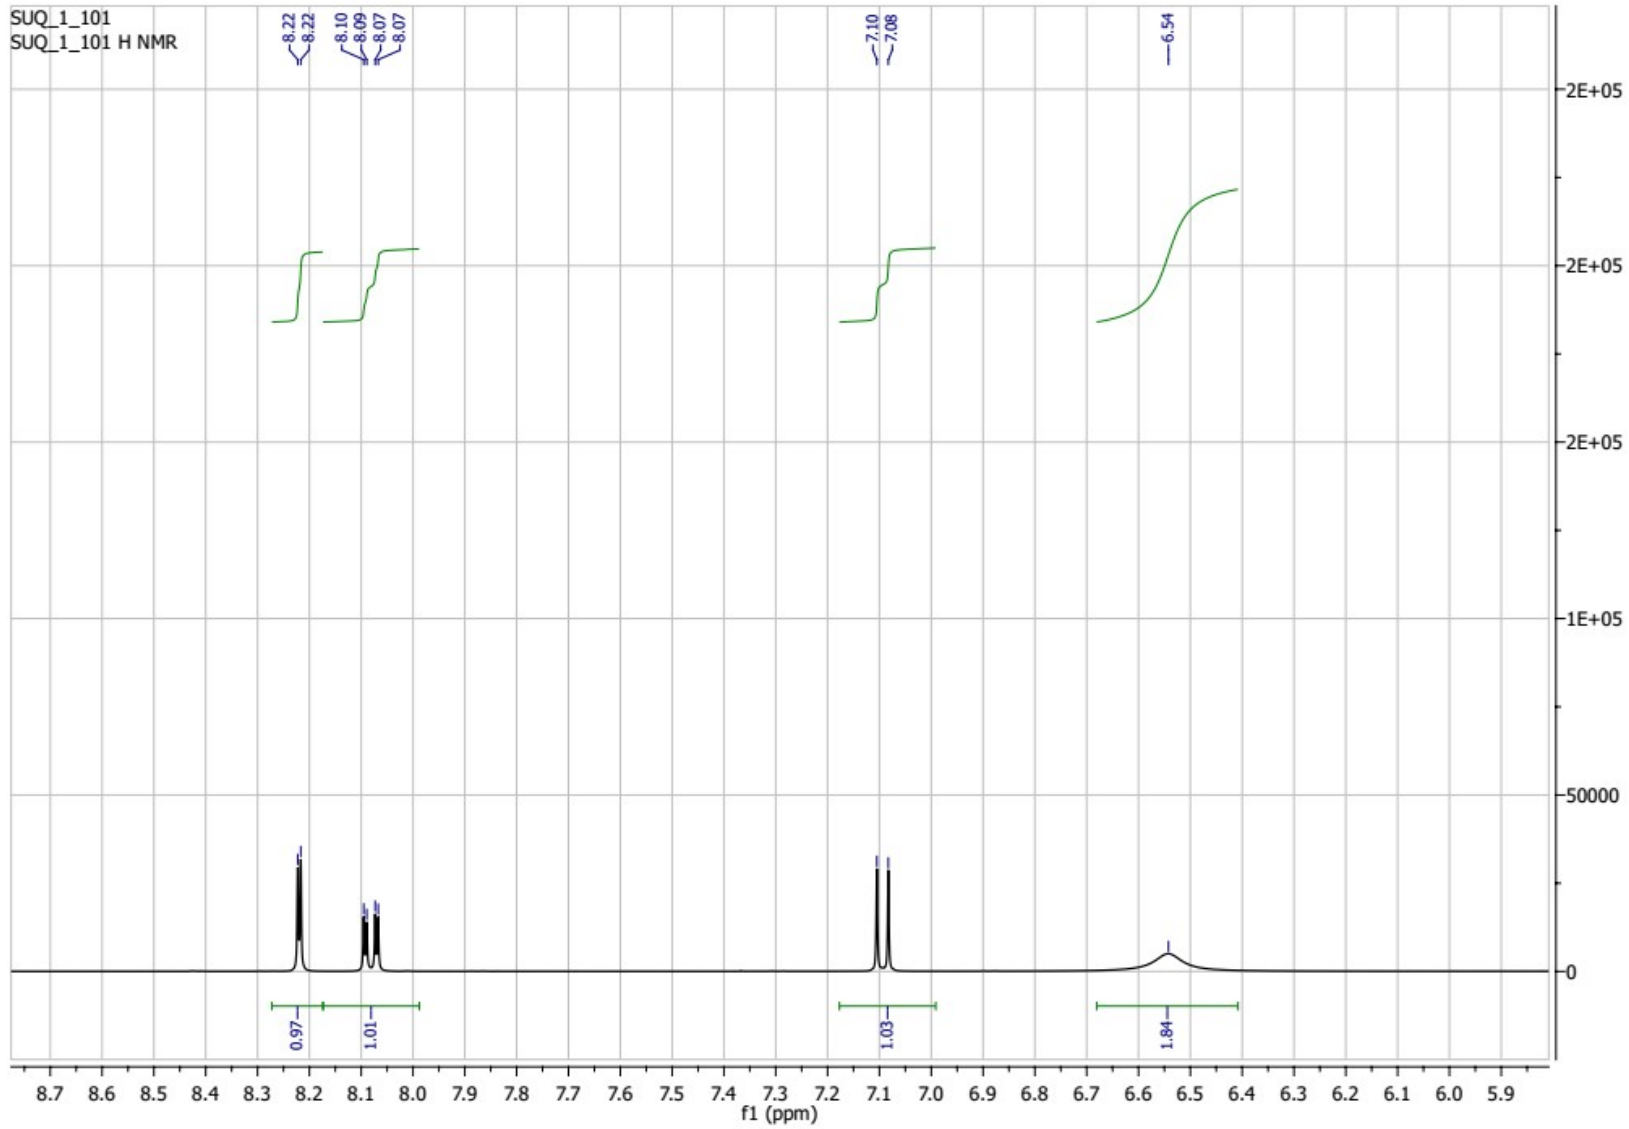

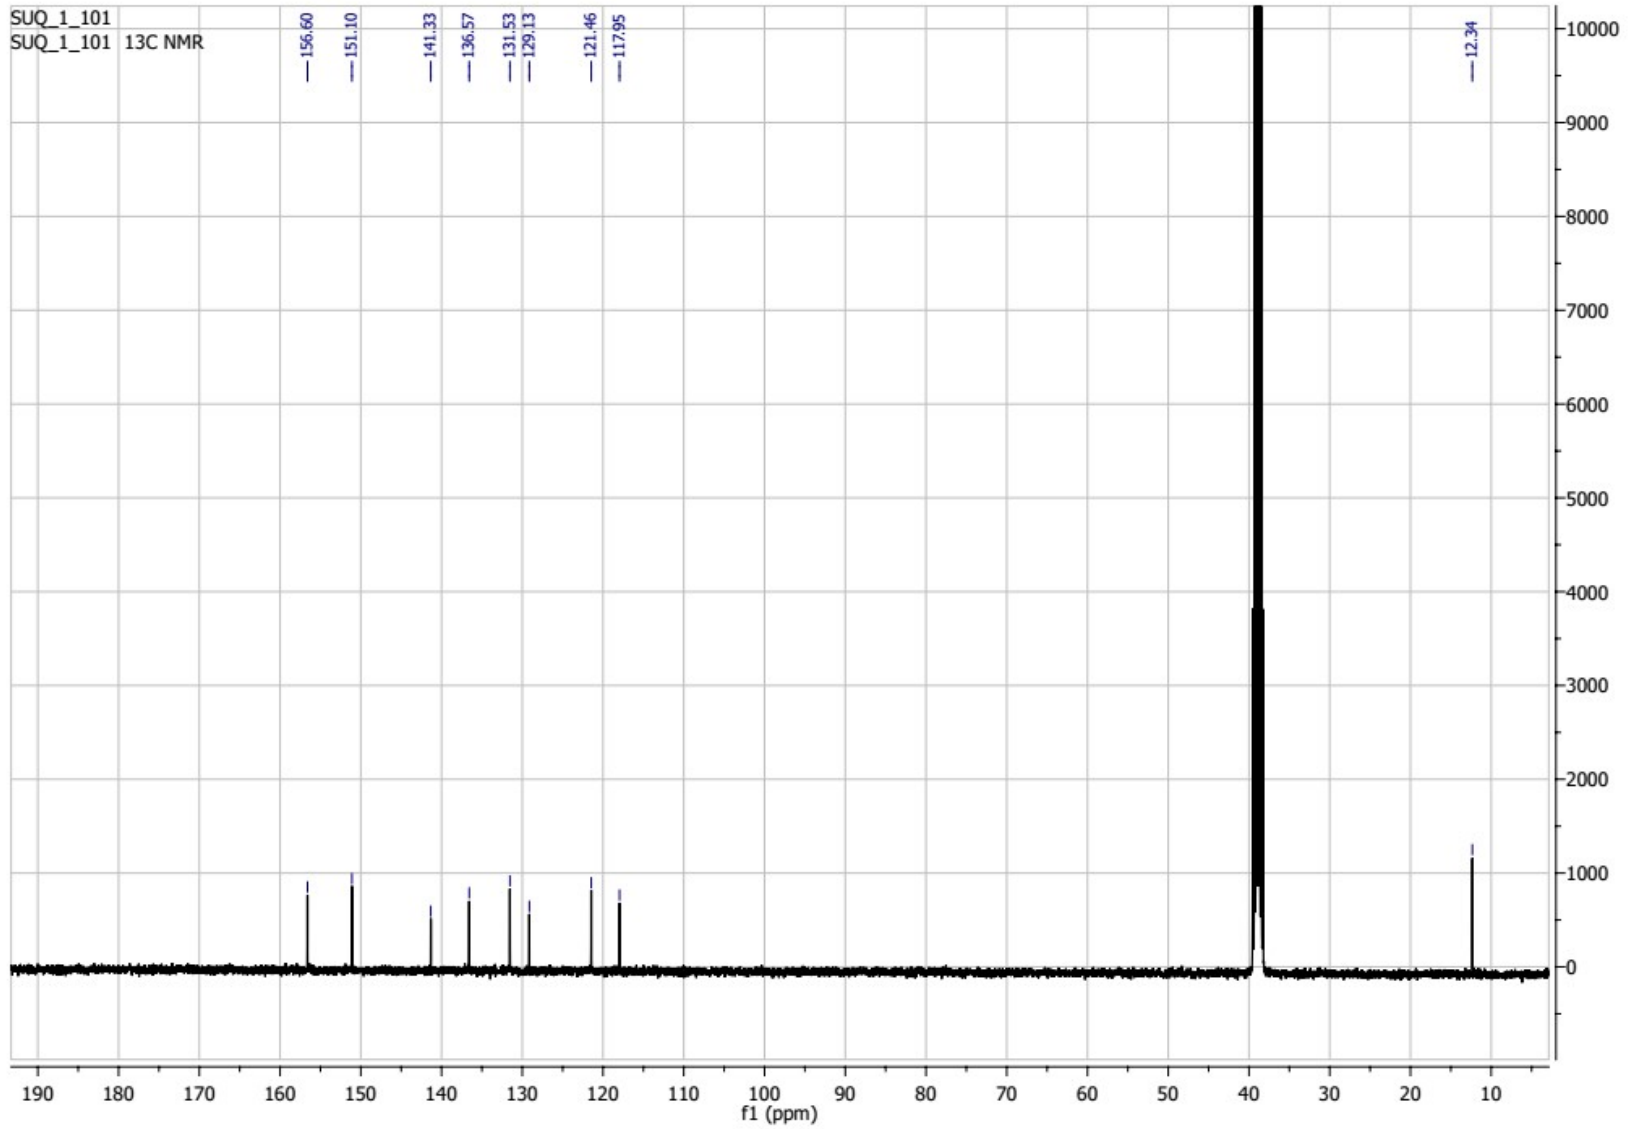

9/1/2020

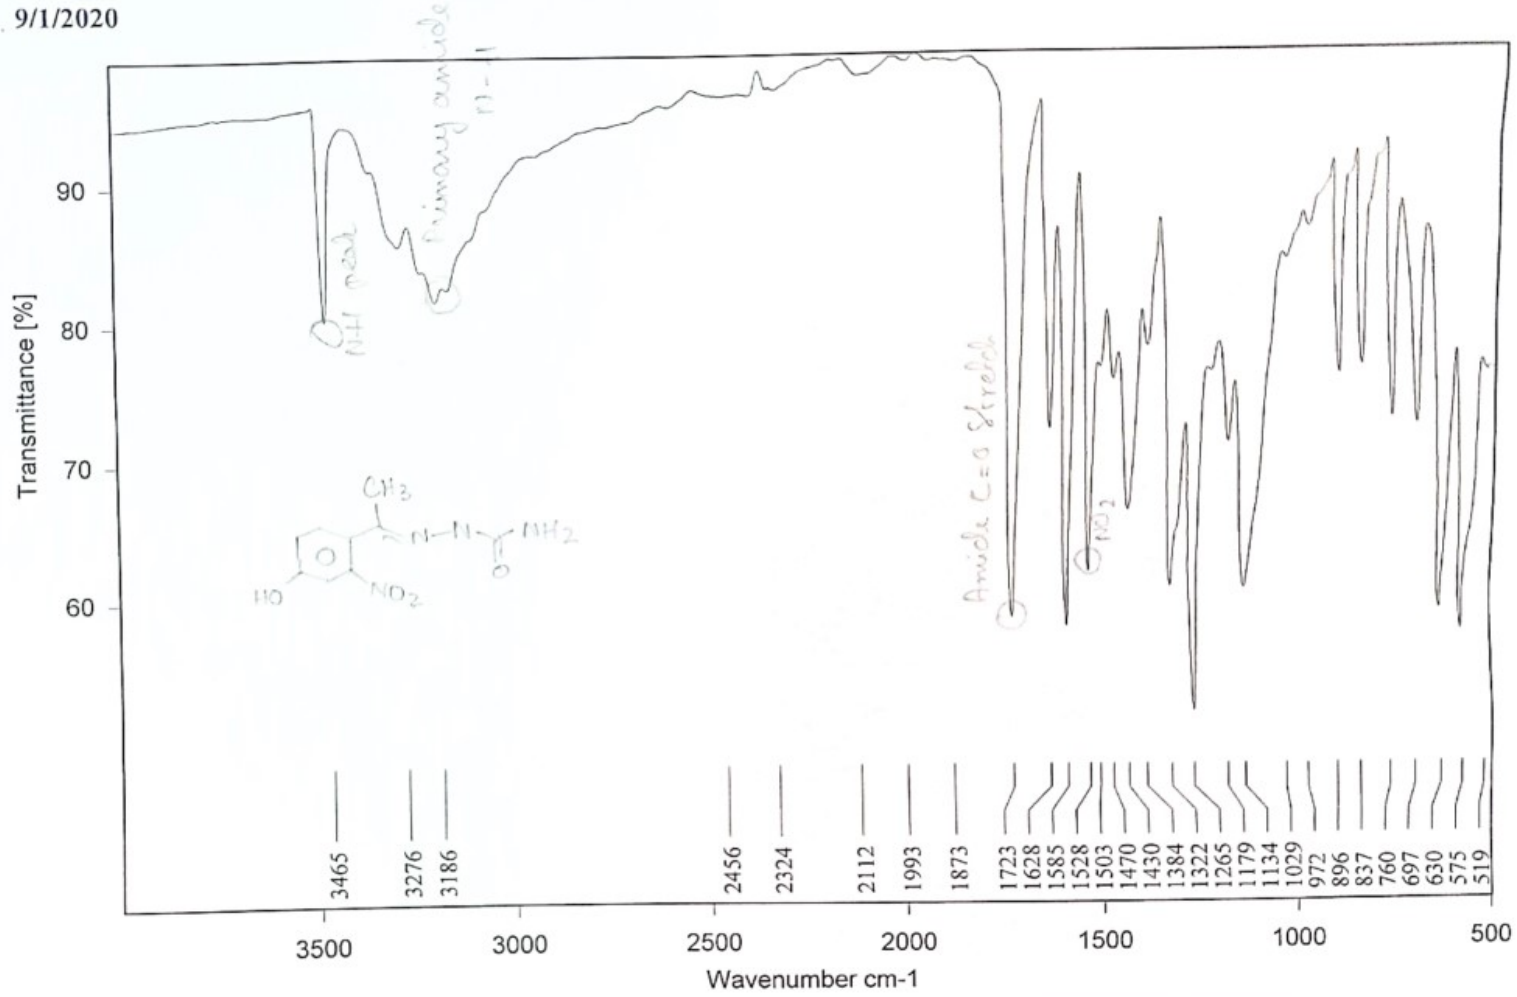

Scanned with CamScanner

|          |        |
|----------|--------|
| CODE NO. | SU-101 |
| MATERIAL | powder |

# Characterization data of Compound 3g:

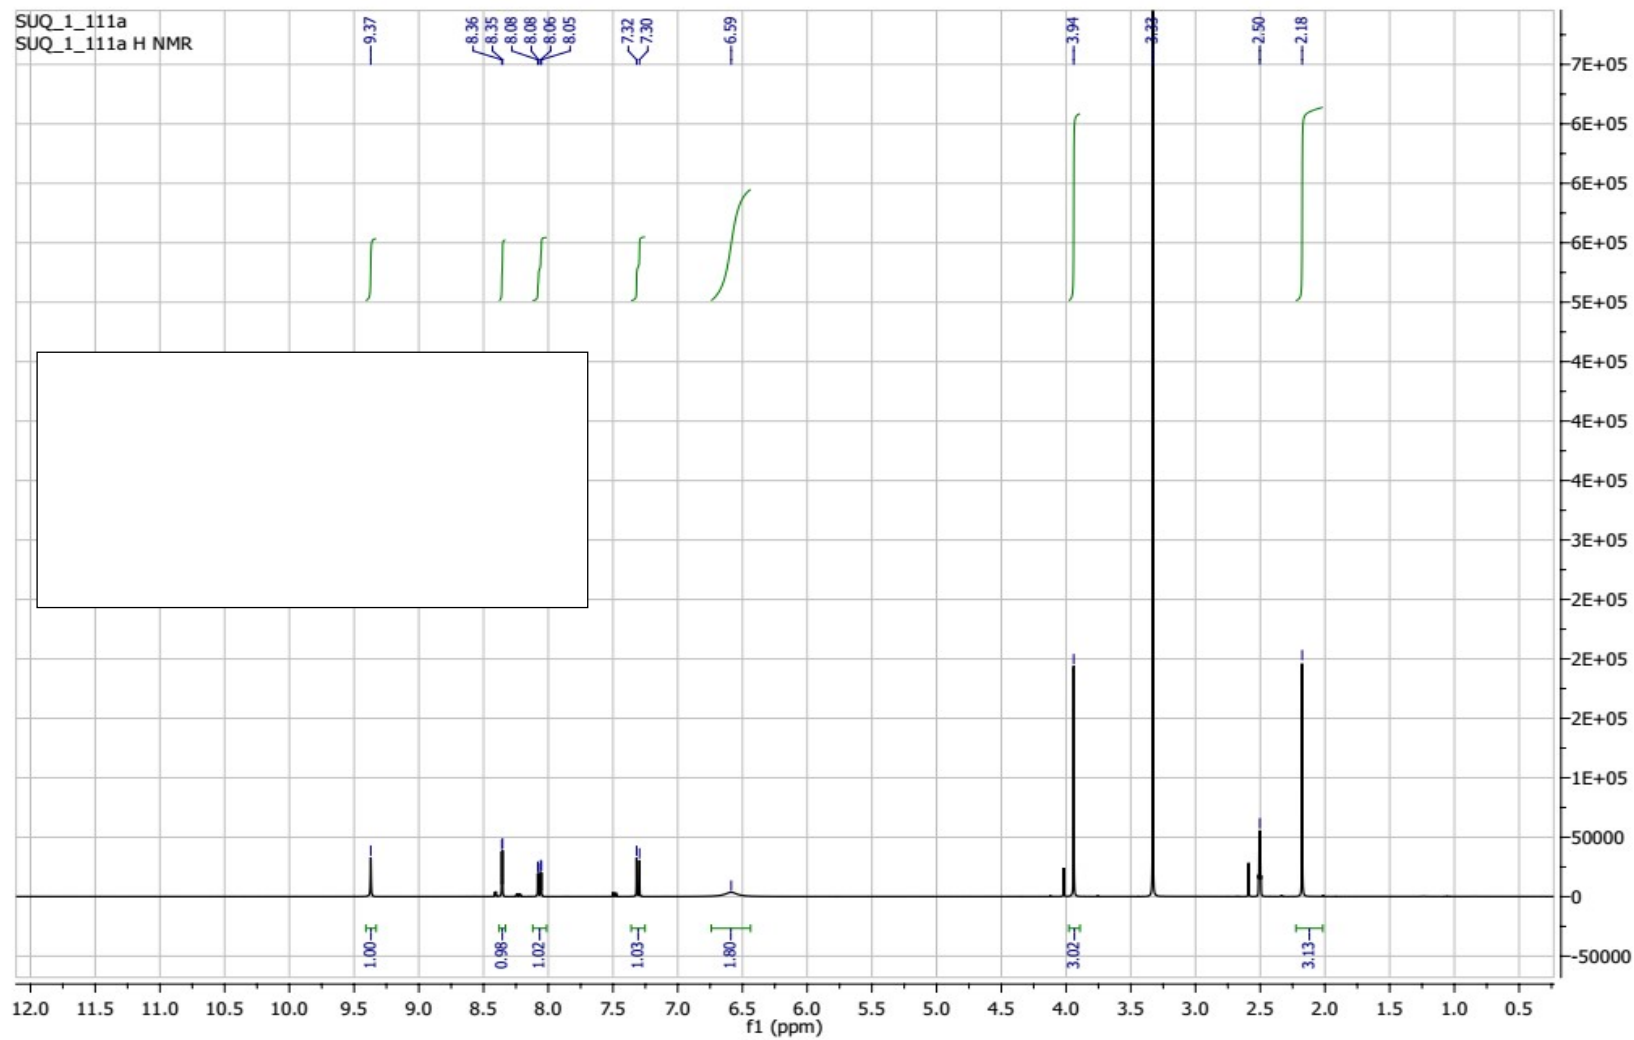

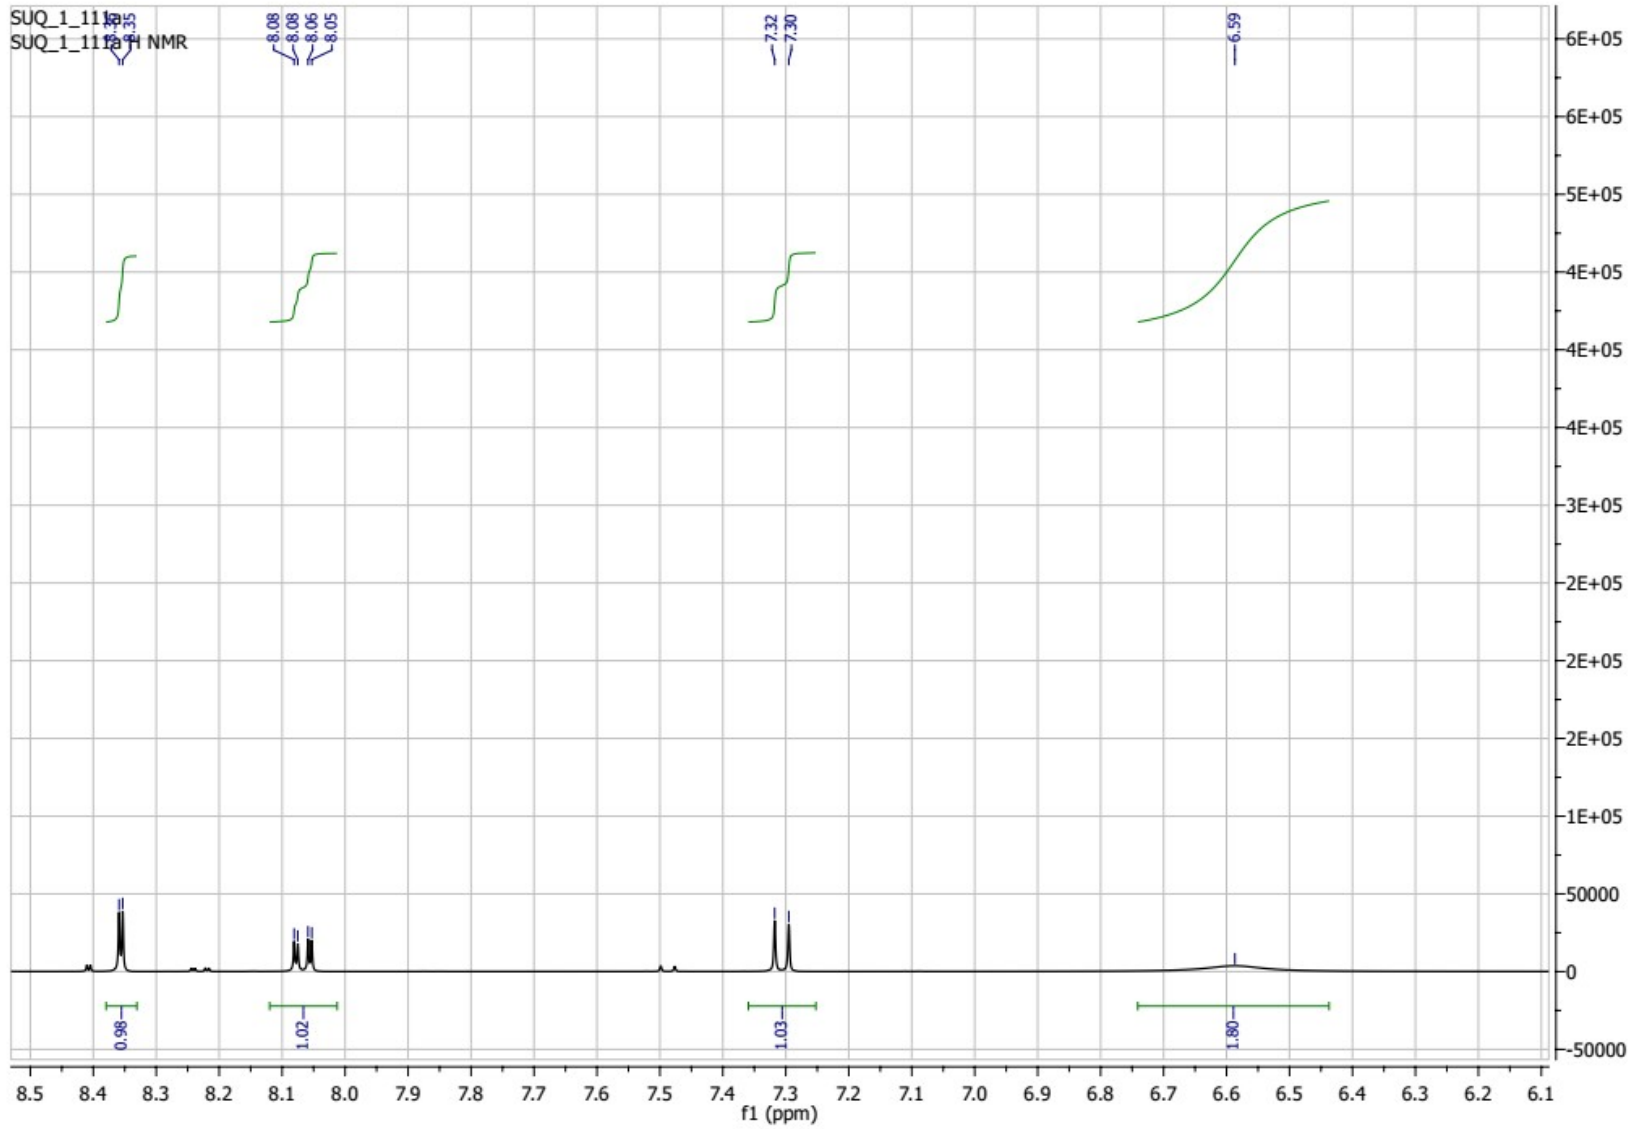

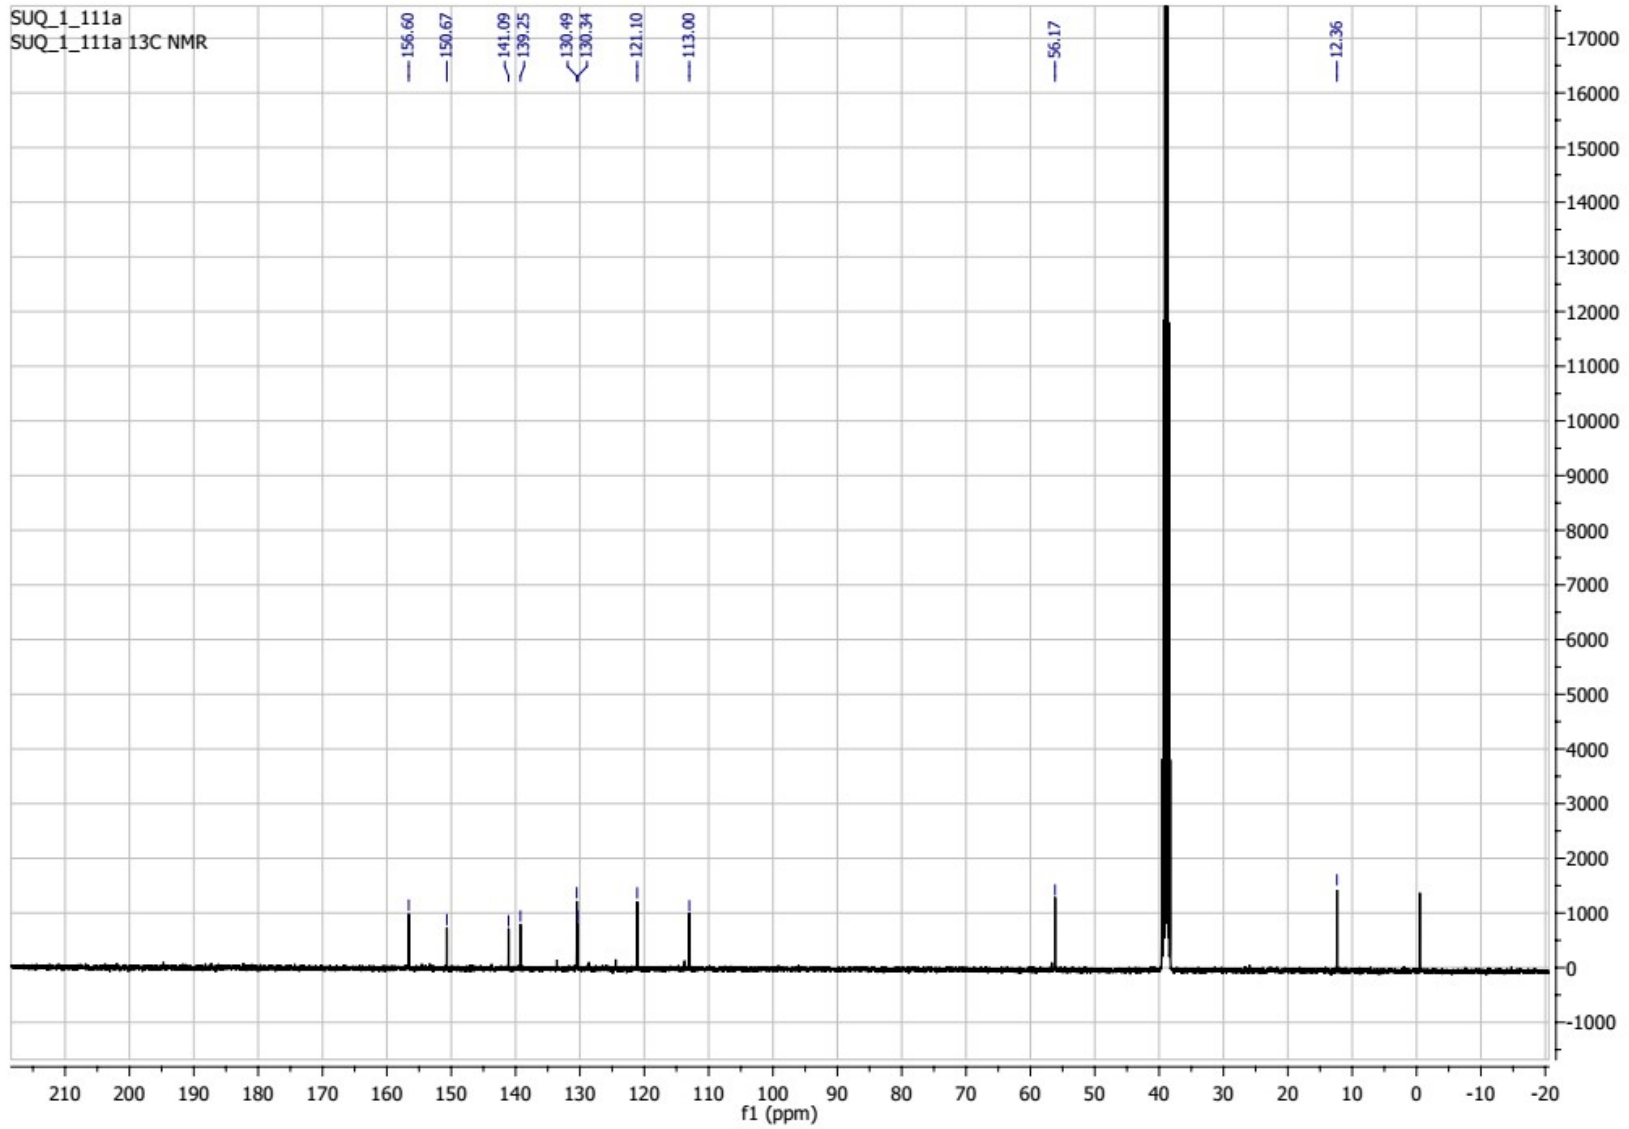

# INDUSTRIAL ANALYTICAL CENTRE

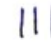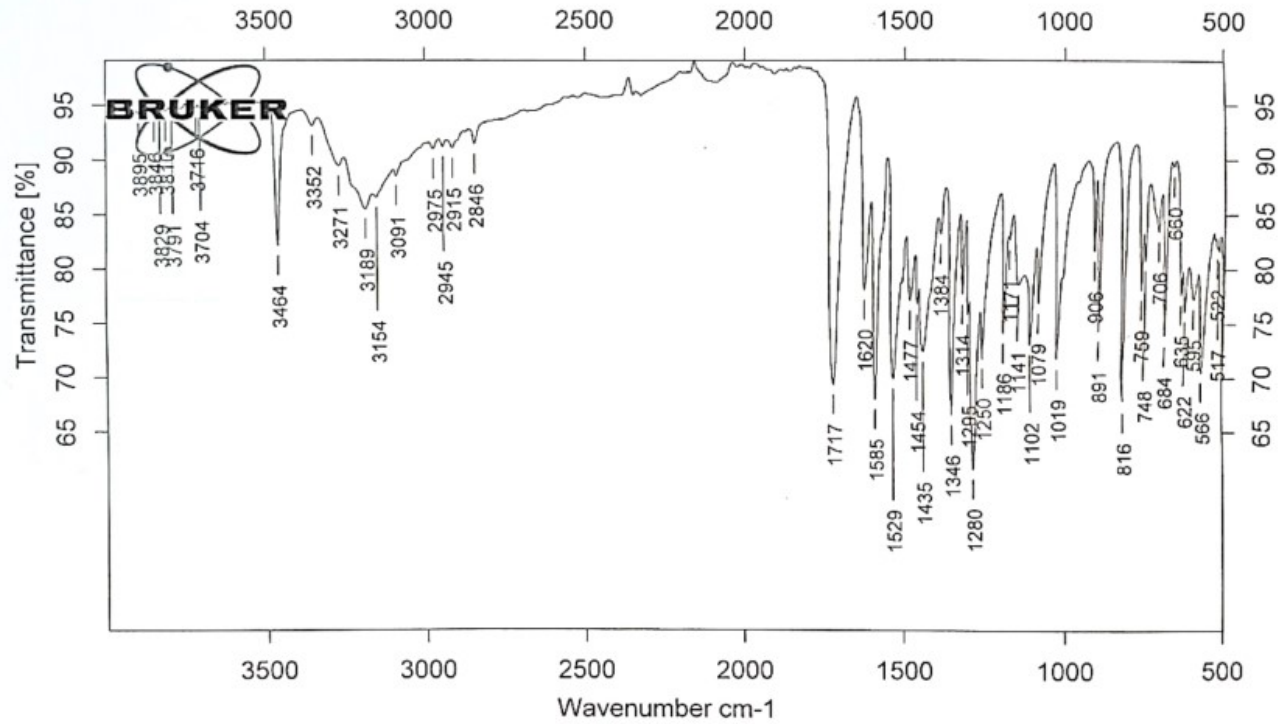

SAMPLE SCANS : 12  
DATE : 8/20/2020  
TIME : 10:37:51 AM

SAMPLE : SAMPLE A  
SAMPLE NAME : POWDER  
USER : AYESHA NAZ



# Characterization data of Compound 3h:

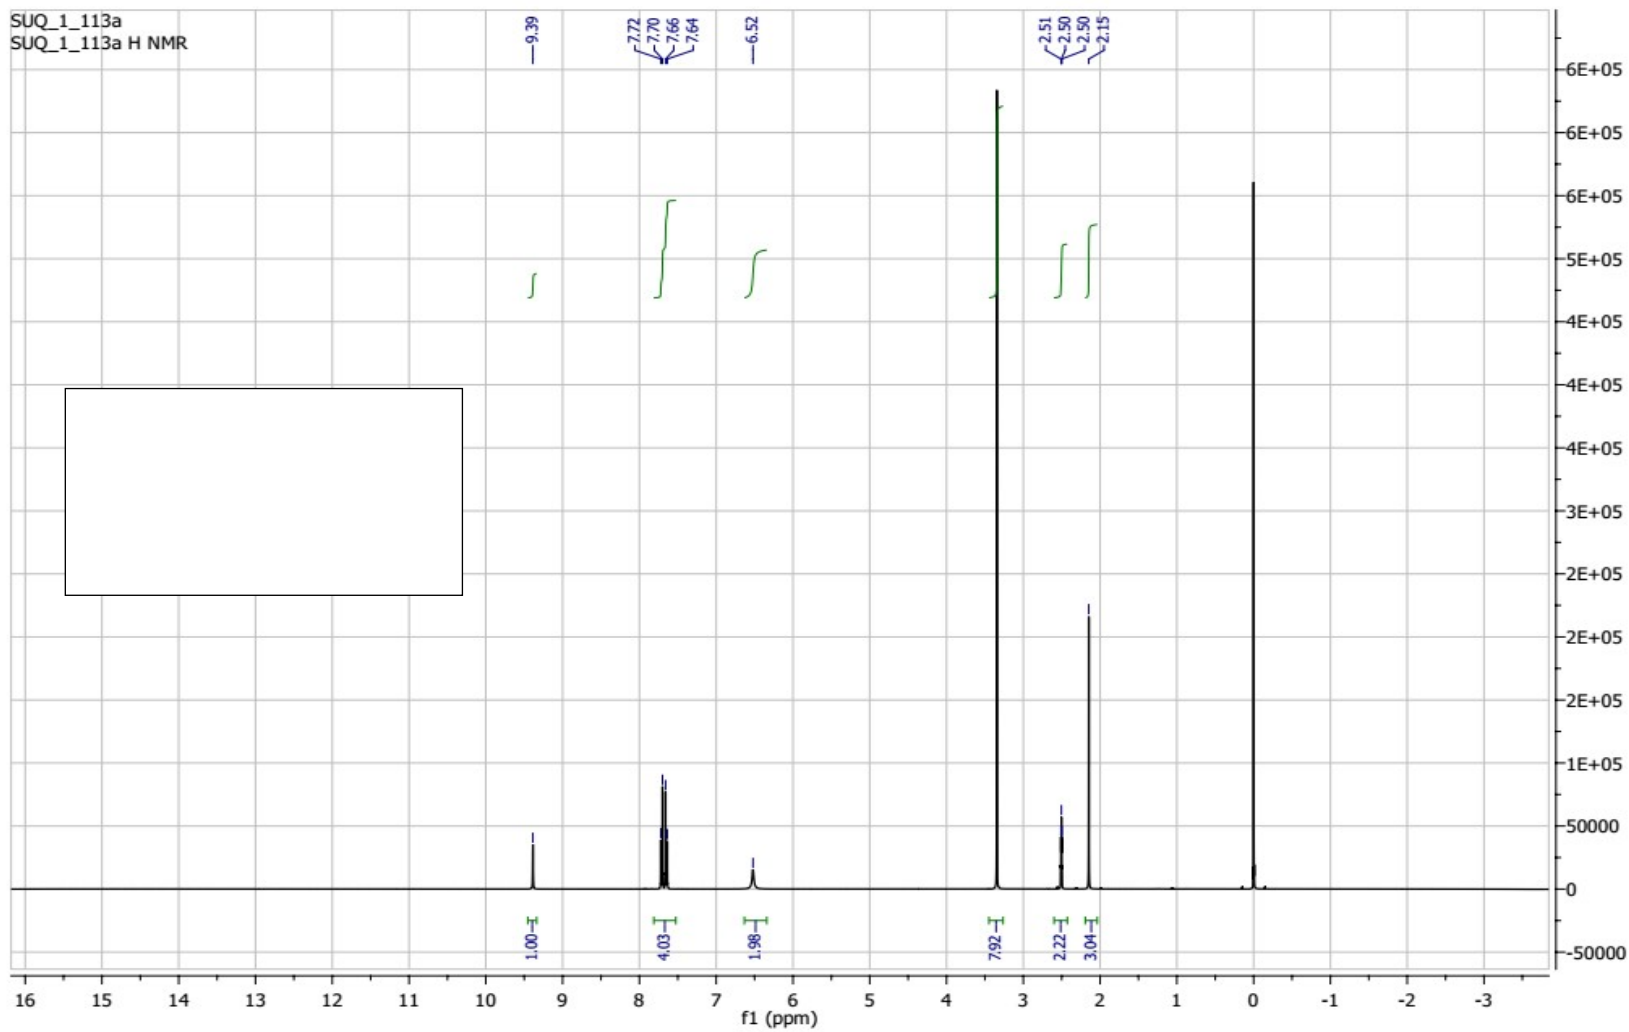

SUQ\_1\_113a  
SUQ\_1\_113a H NMR

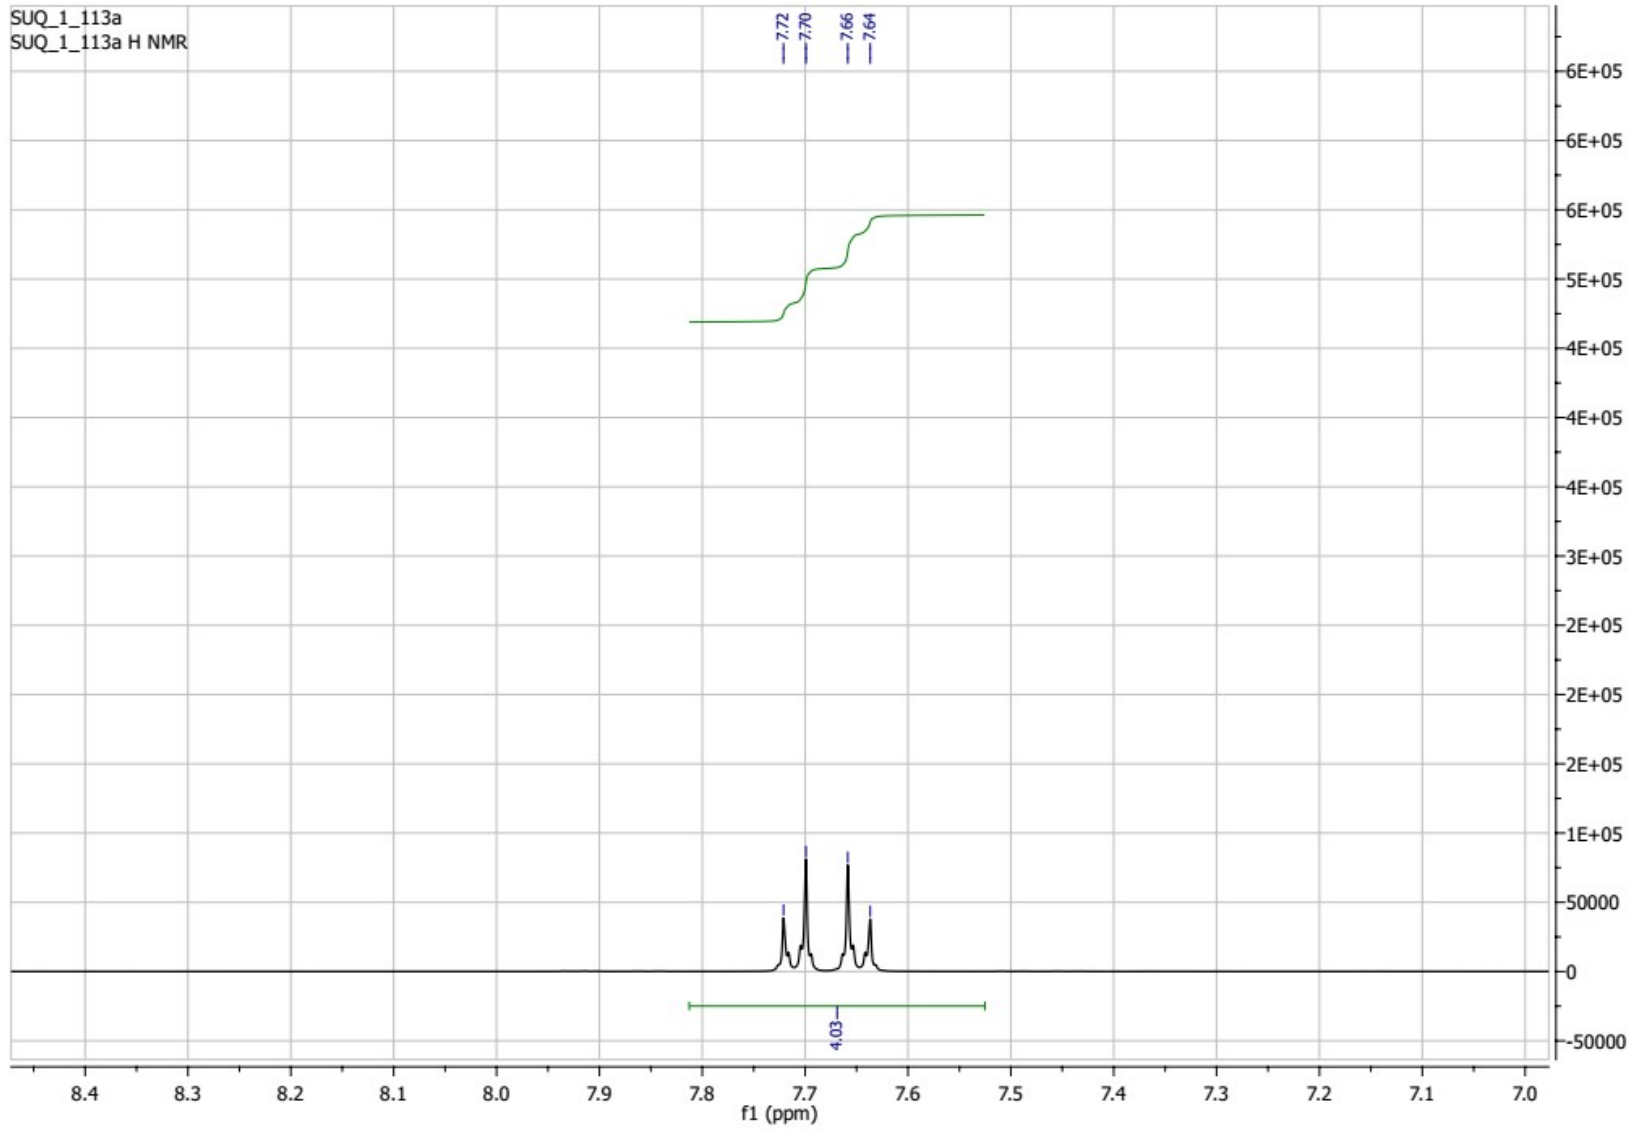

SUQ\_1\_113a  
SUQ\_1\_113a 13C NMR

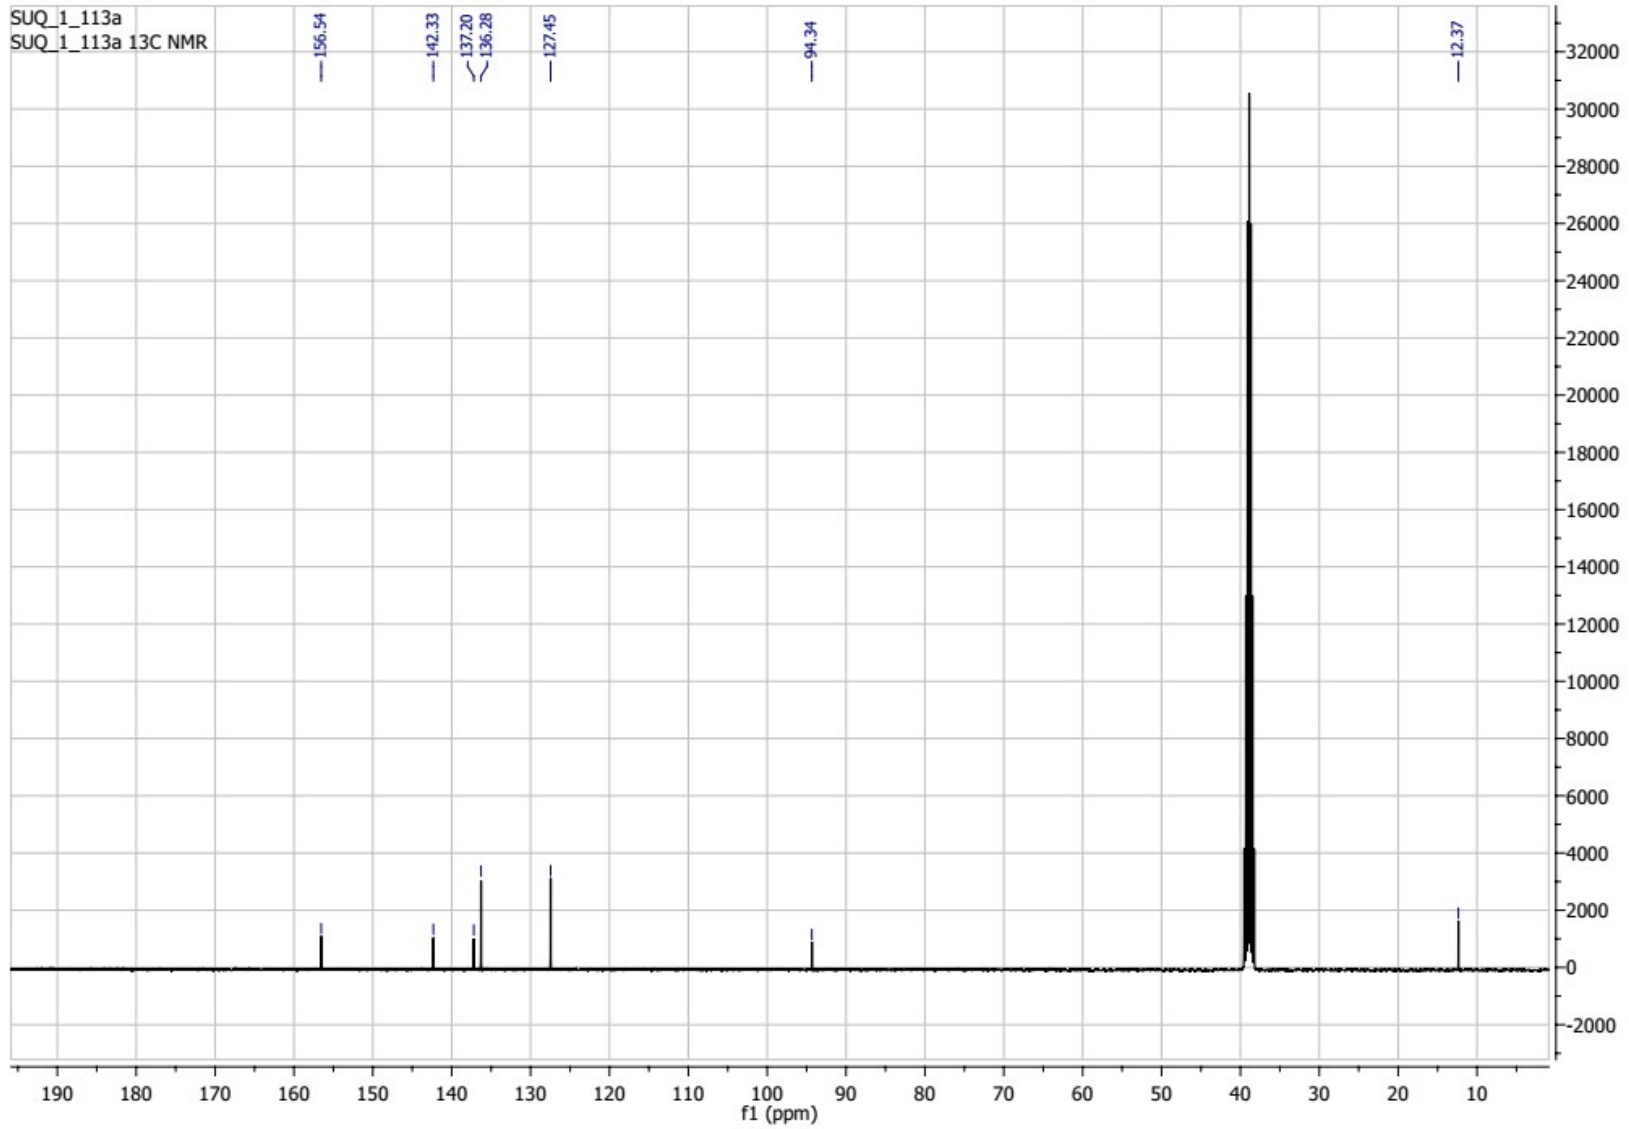

9/1/2020

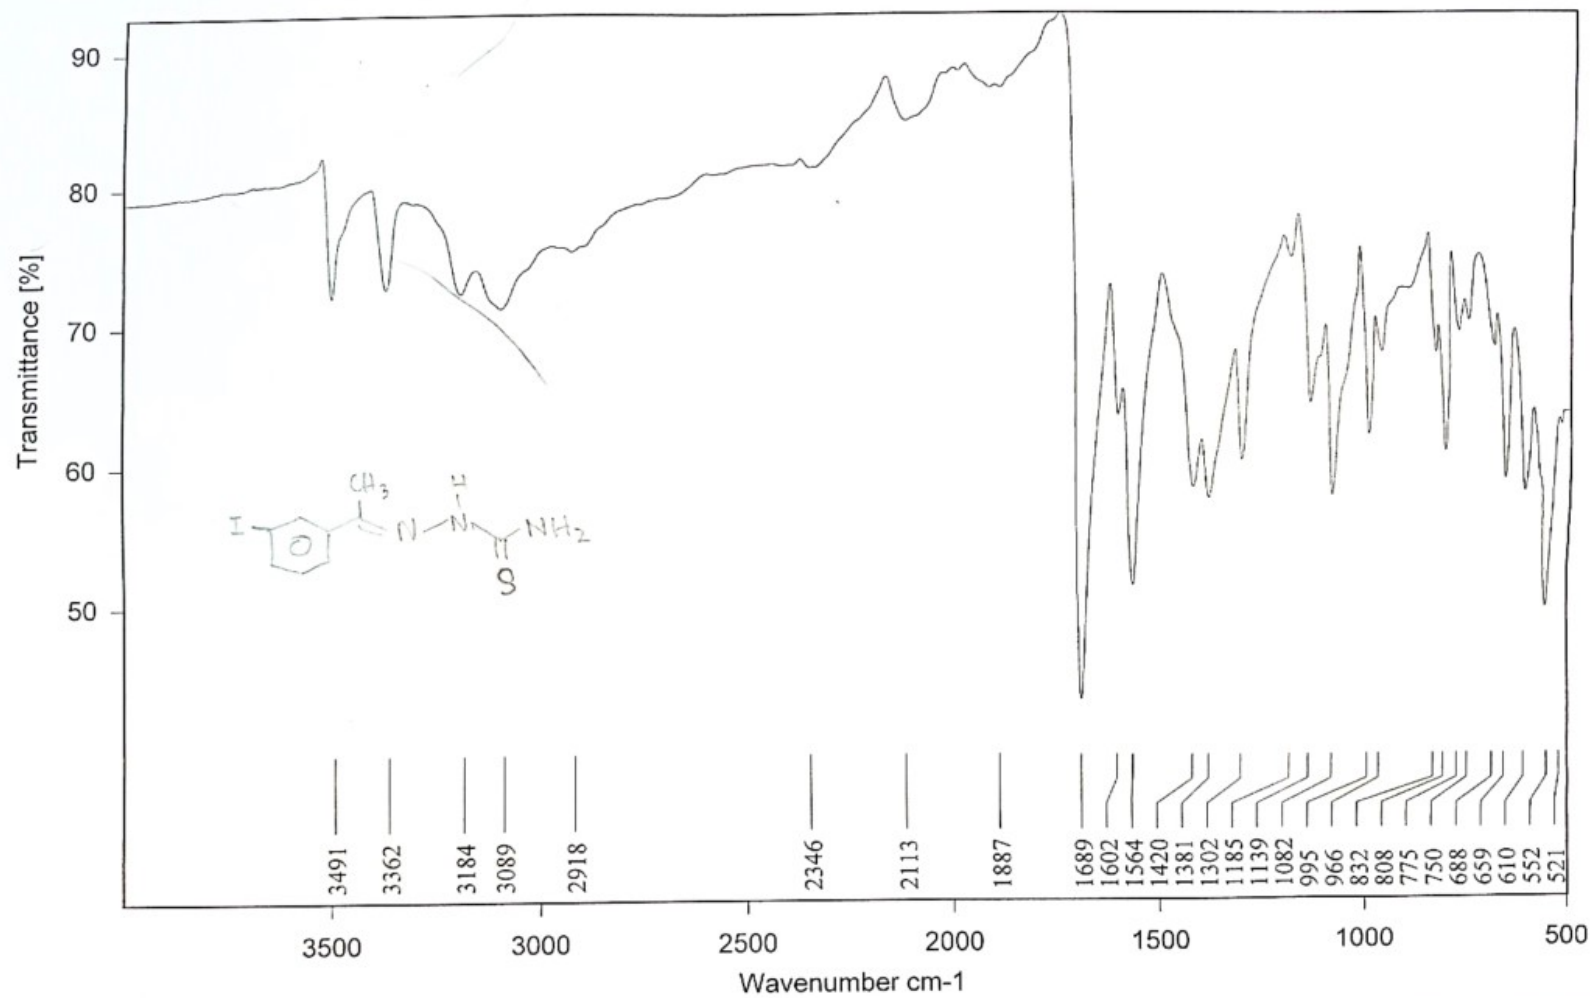

Scanned with CamScanner

|          |        |
|----------|--------|
| CODE NO. | SU-113 |
| MATERIAL | powder |

# Characterization data of Compound 3i:

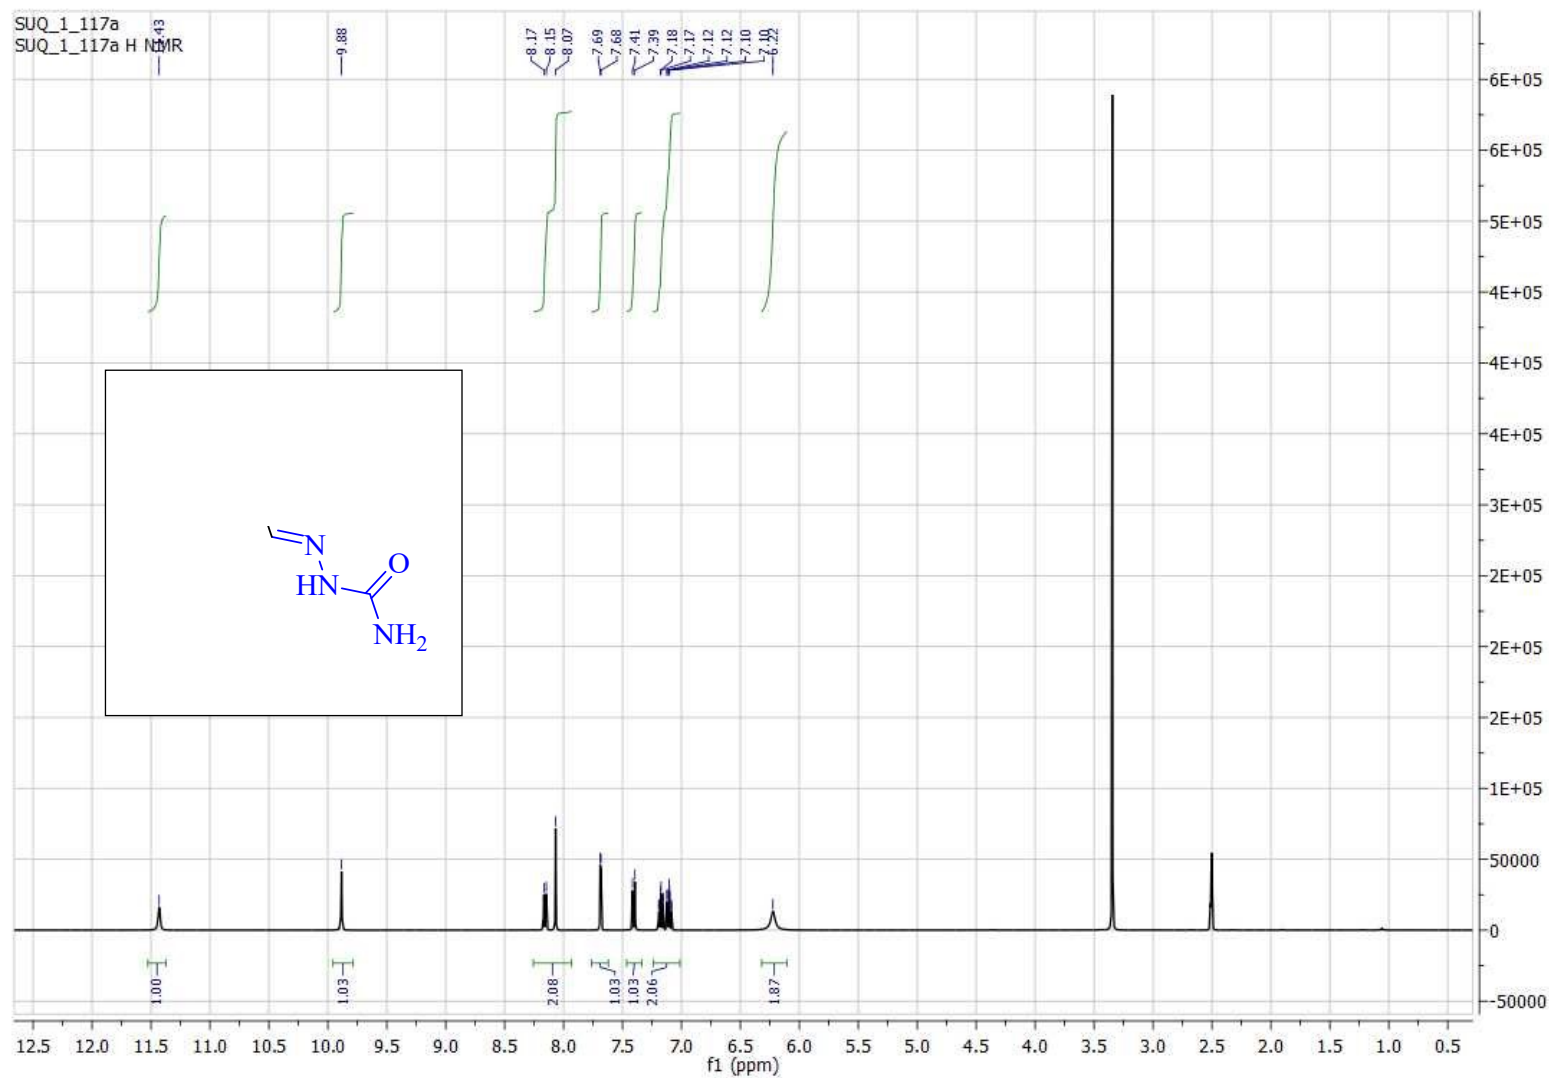

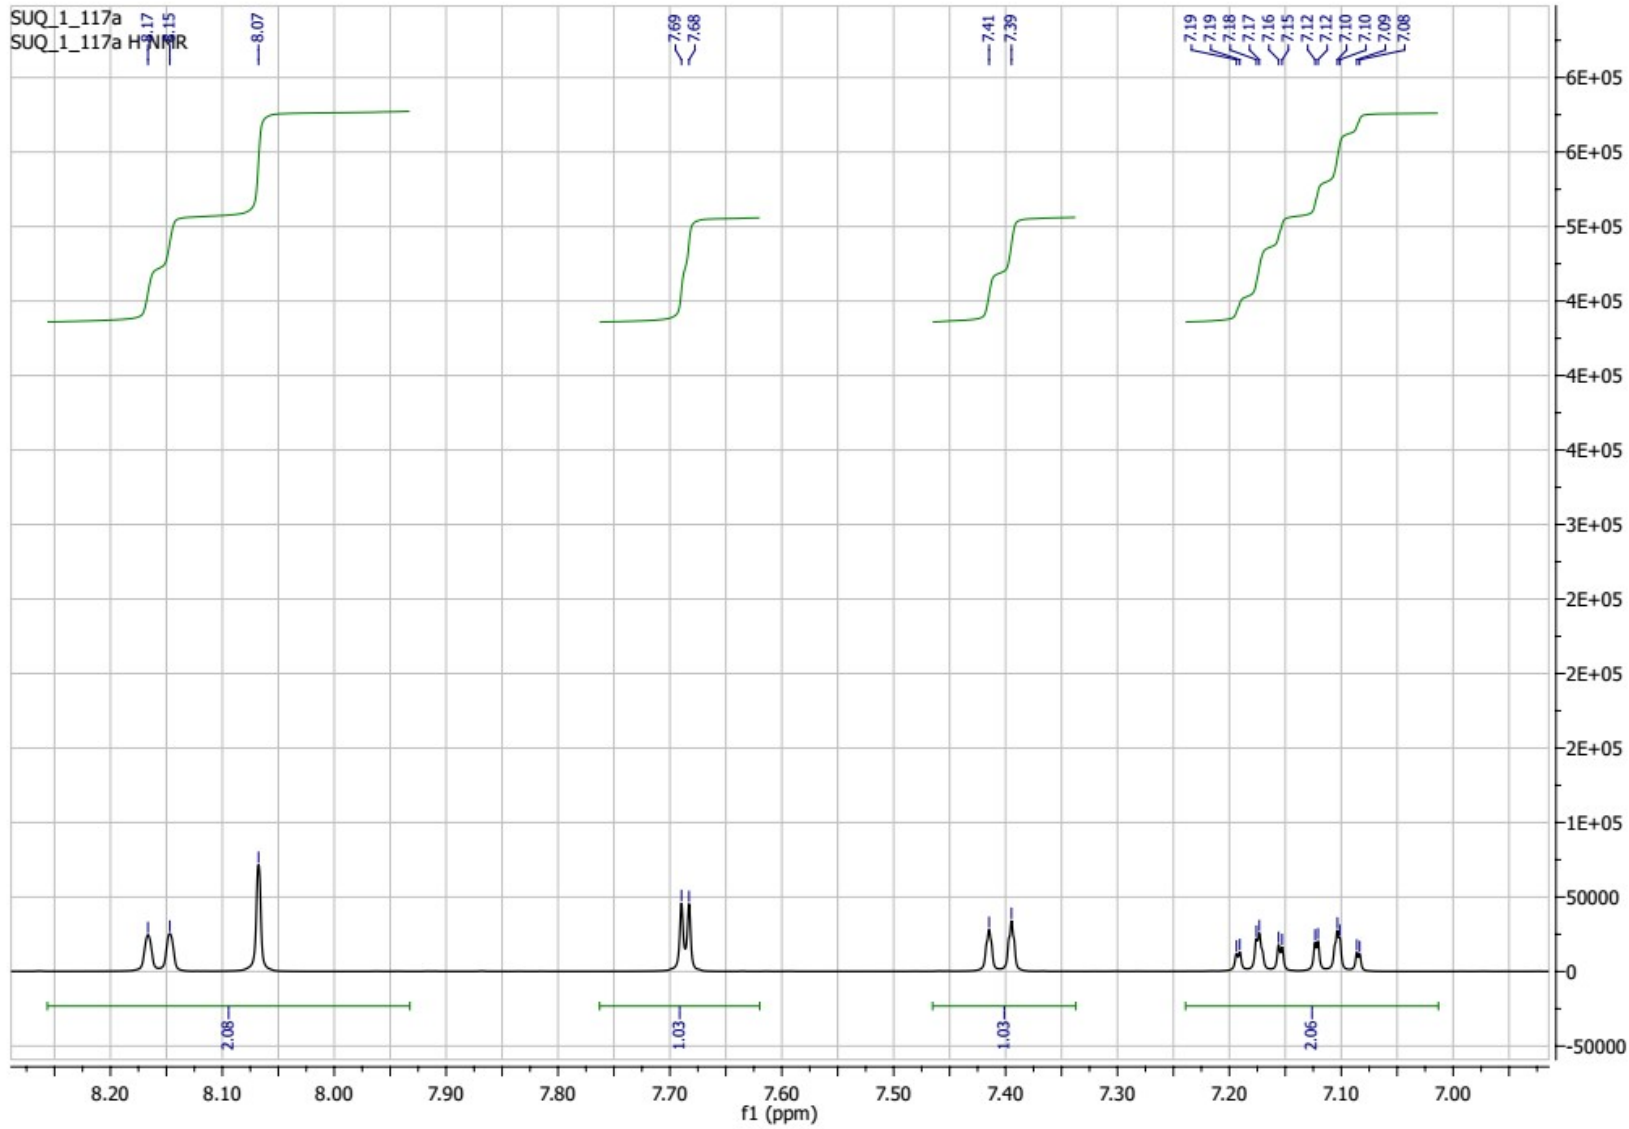

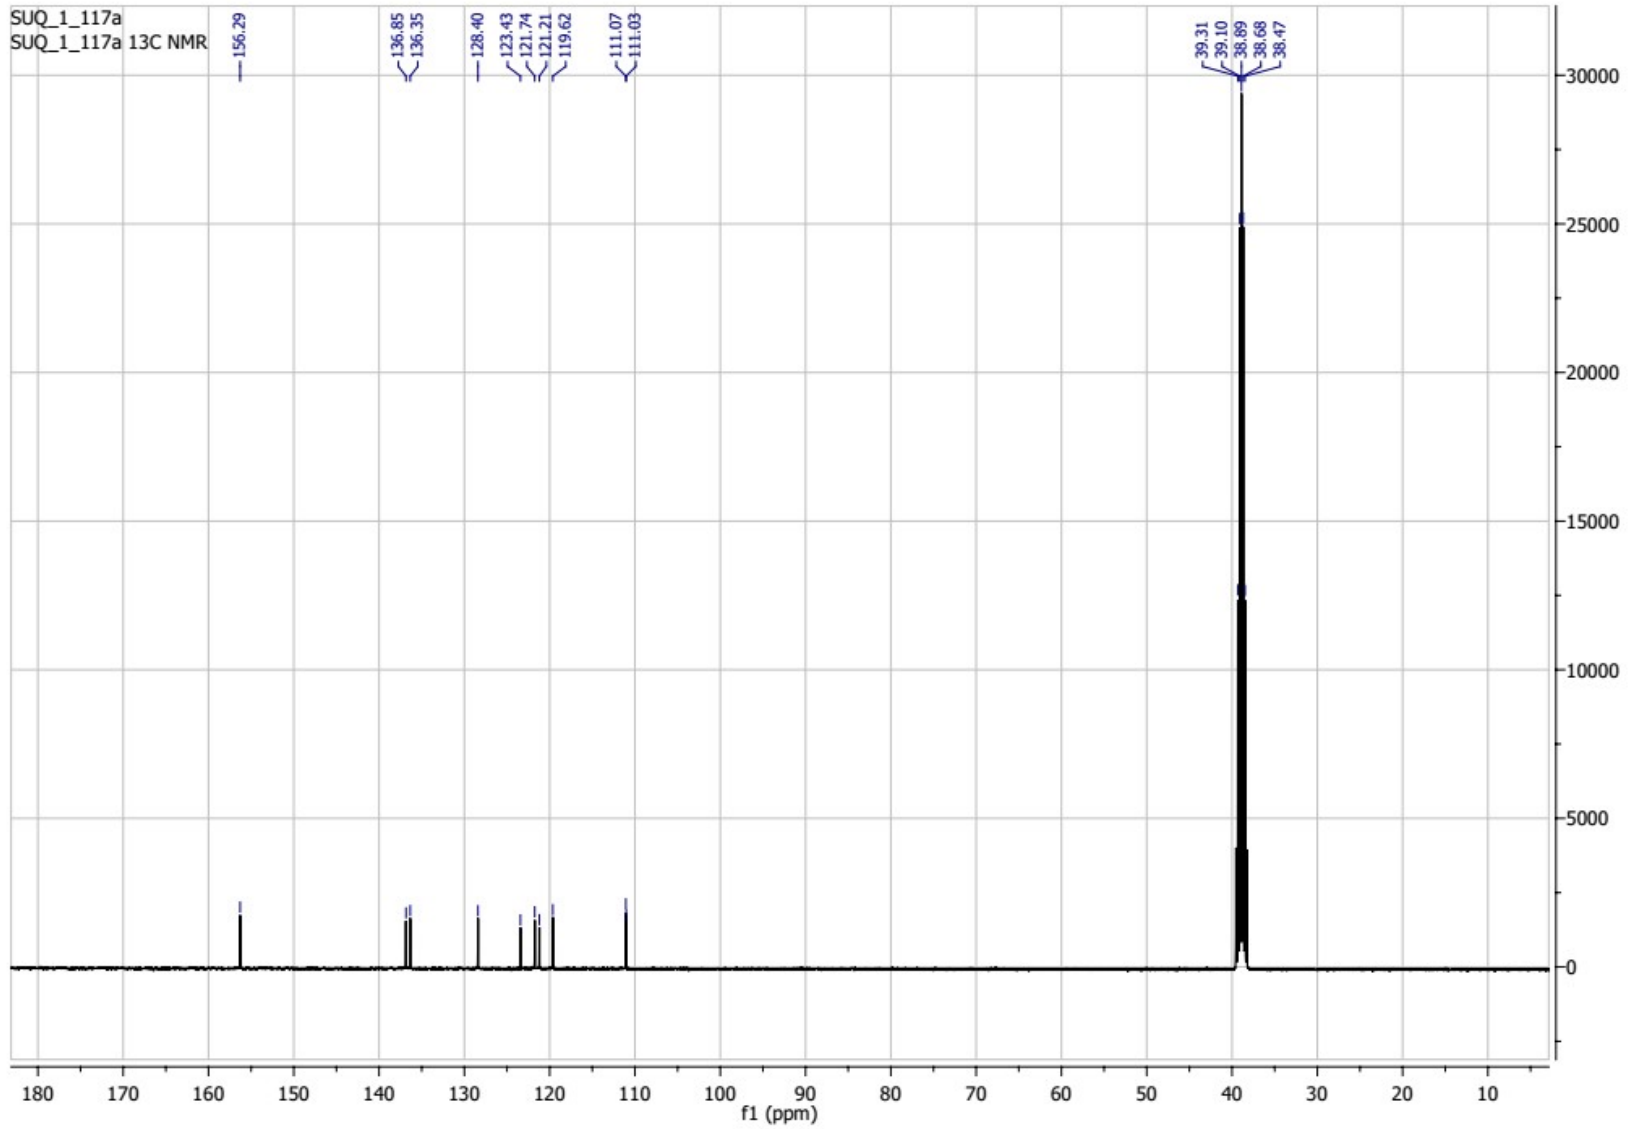

9/1/2020

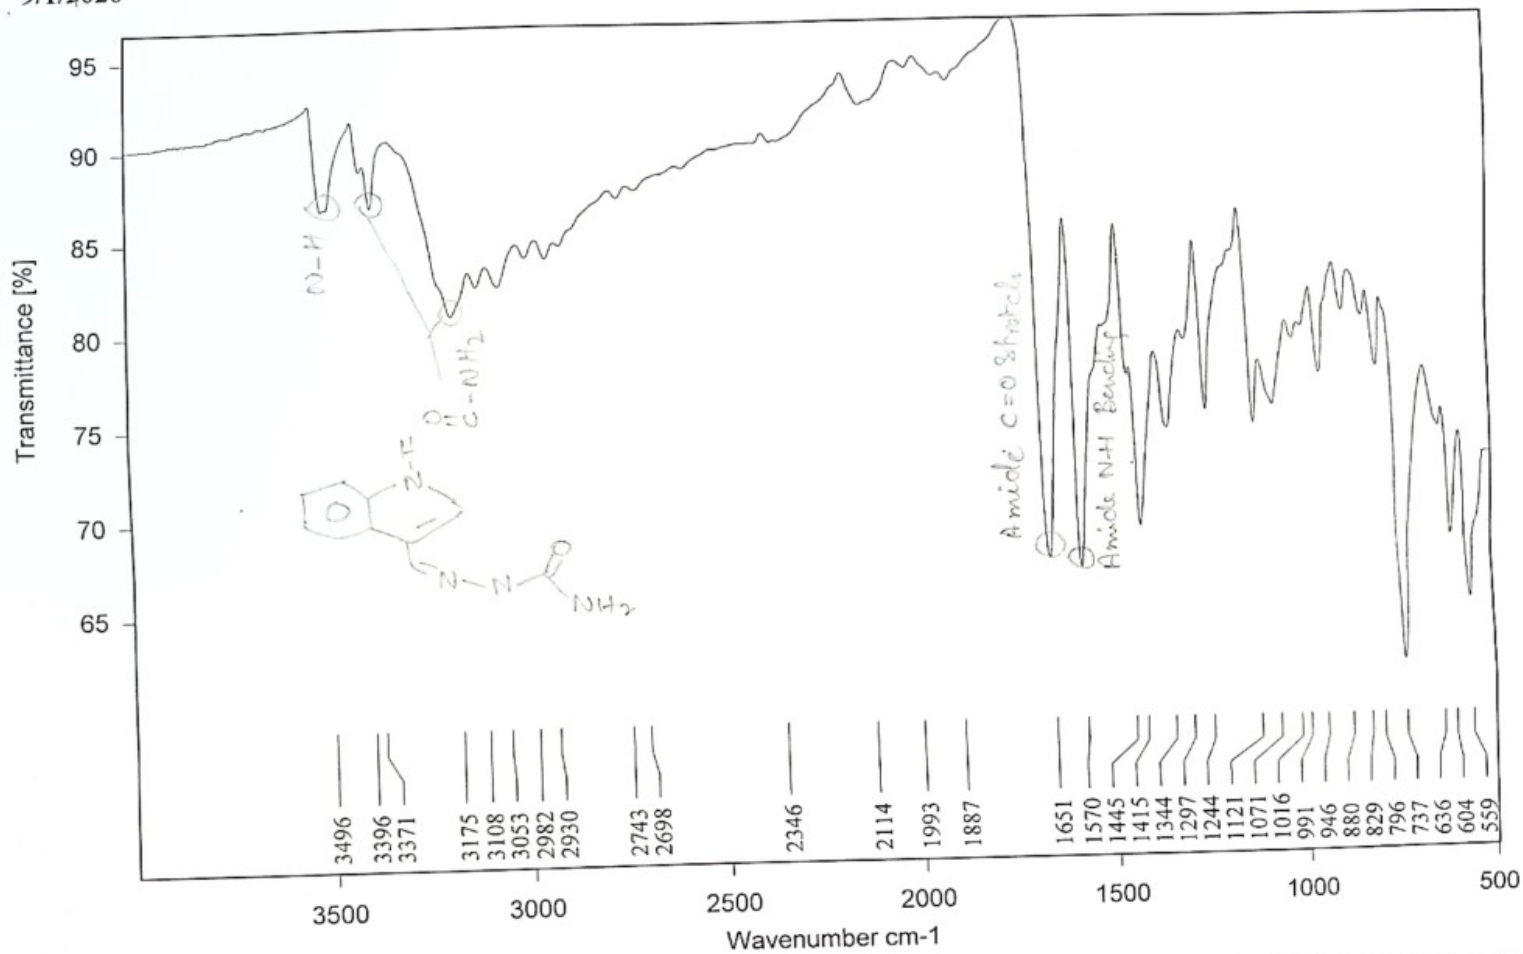

Scanned with CamScanner

CODE NO.

MATERIAL

SU-117a

powder



# Characterization data of Compound 3j:

SUQ-1\_93  
SUQ-1\_93 H NMR

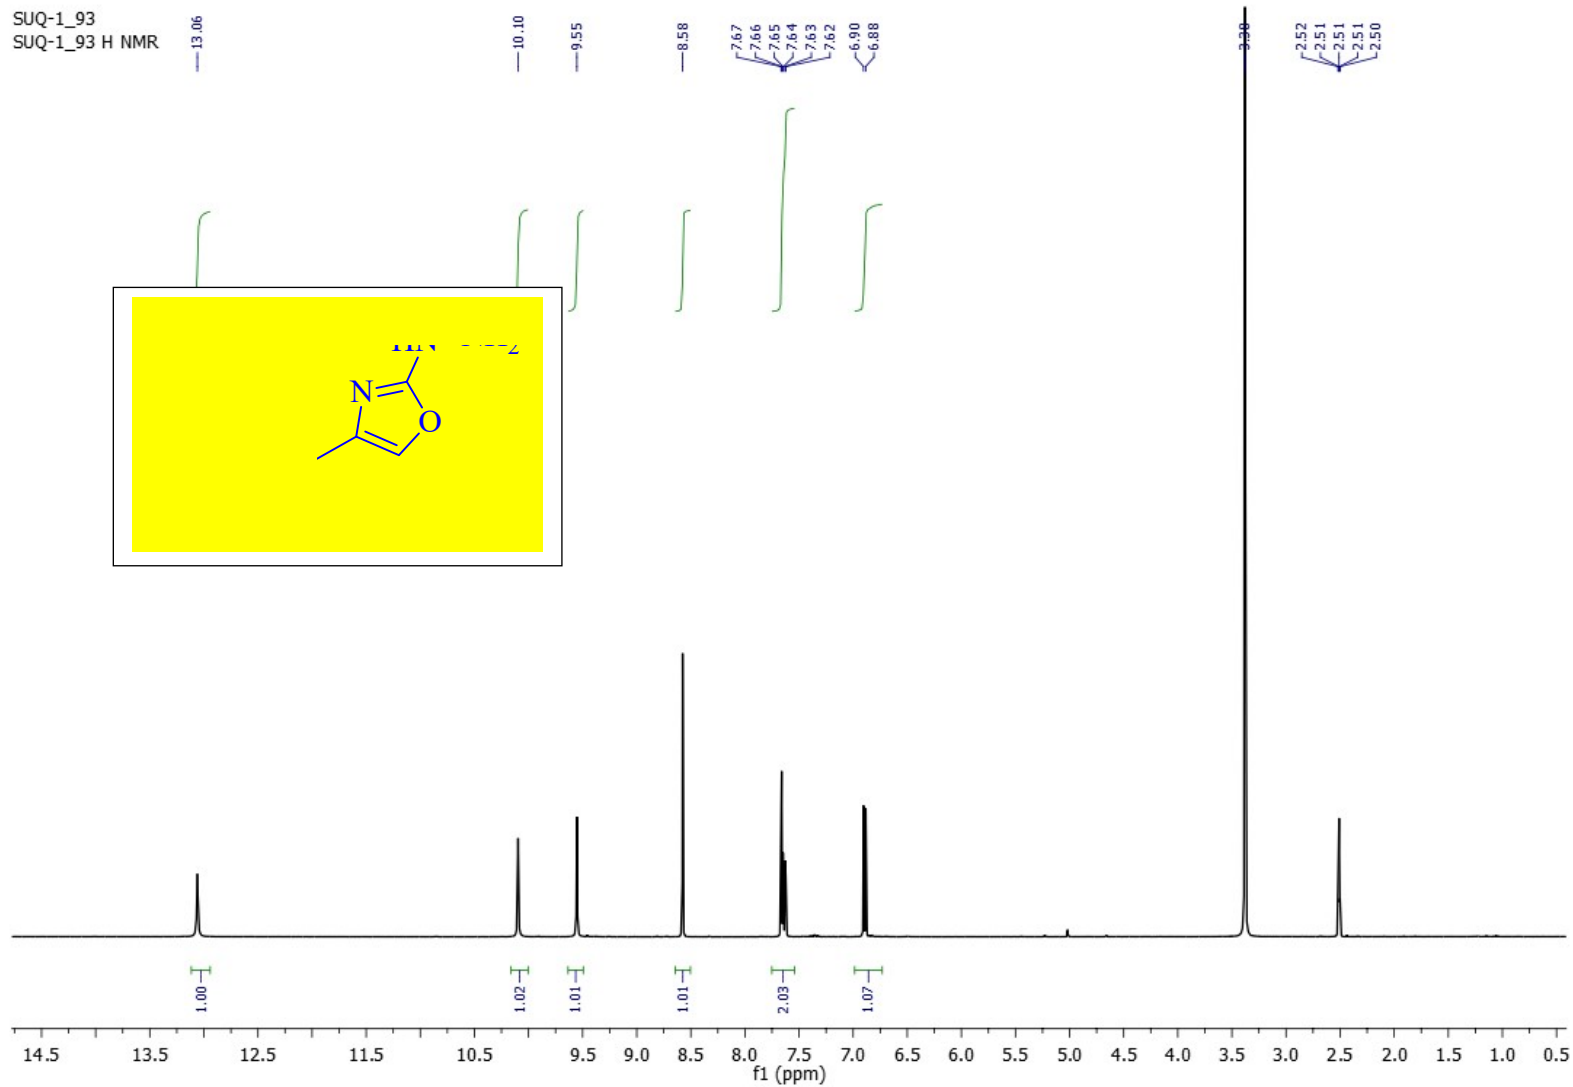

SUQ-1\_93  
SUQ-1\_93 H NMR

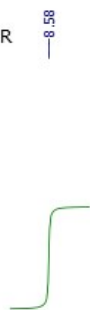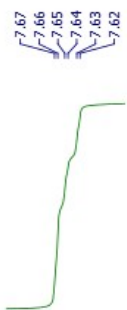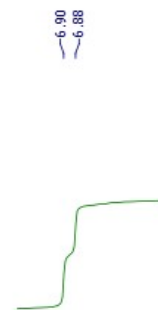

7.67  
7.66  
7.65  
7.64  
7.63  
7.62

6.90  
6.88

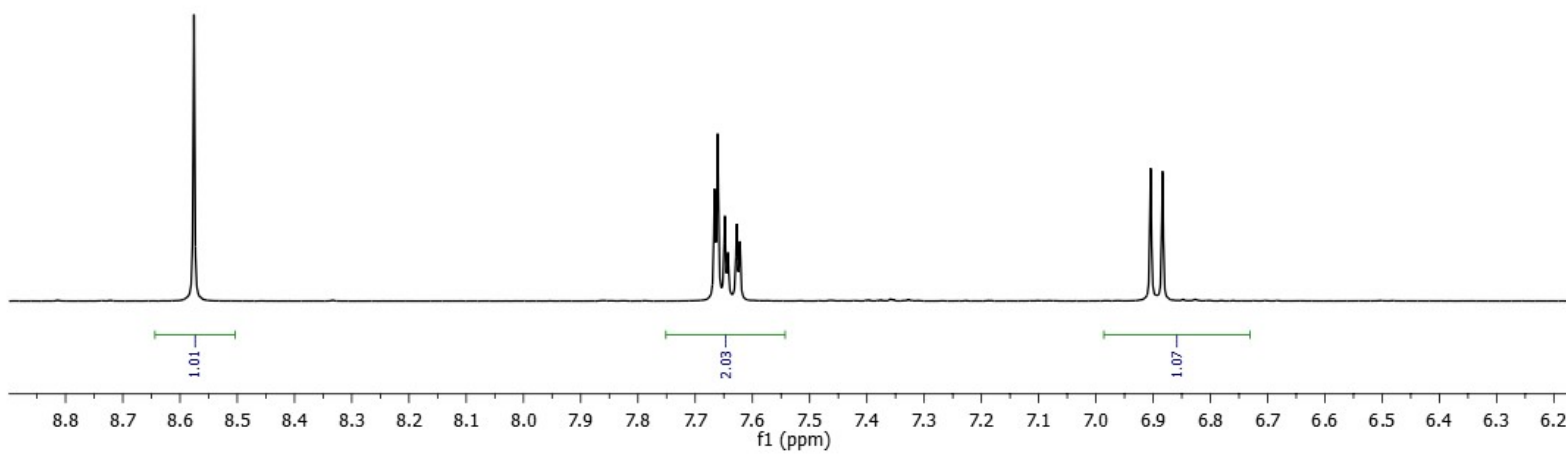

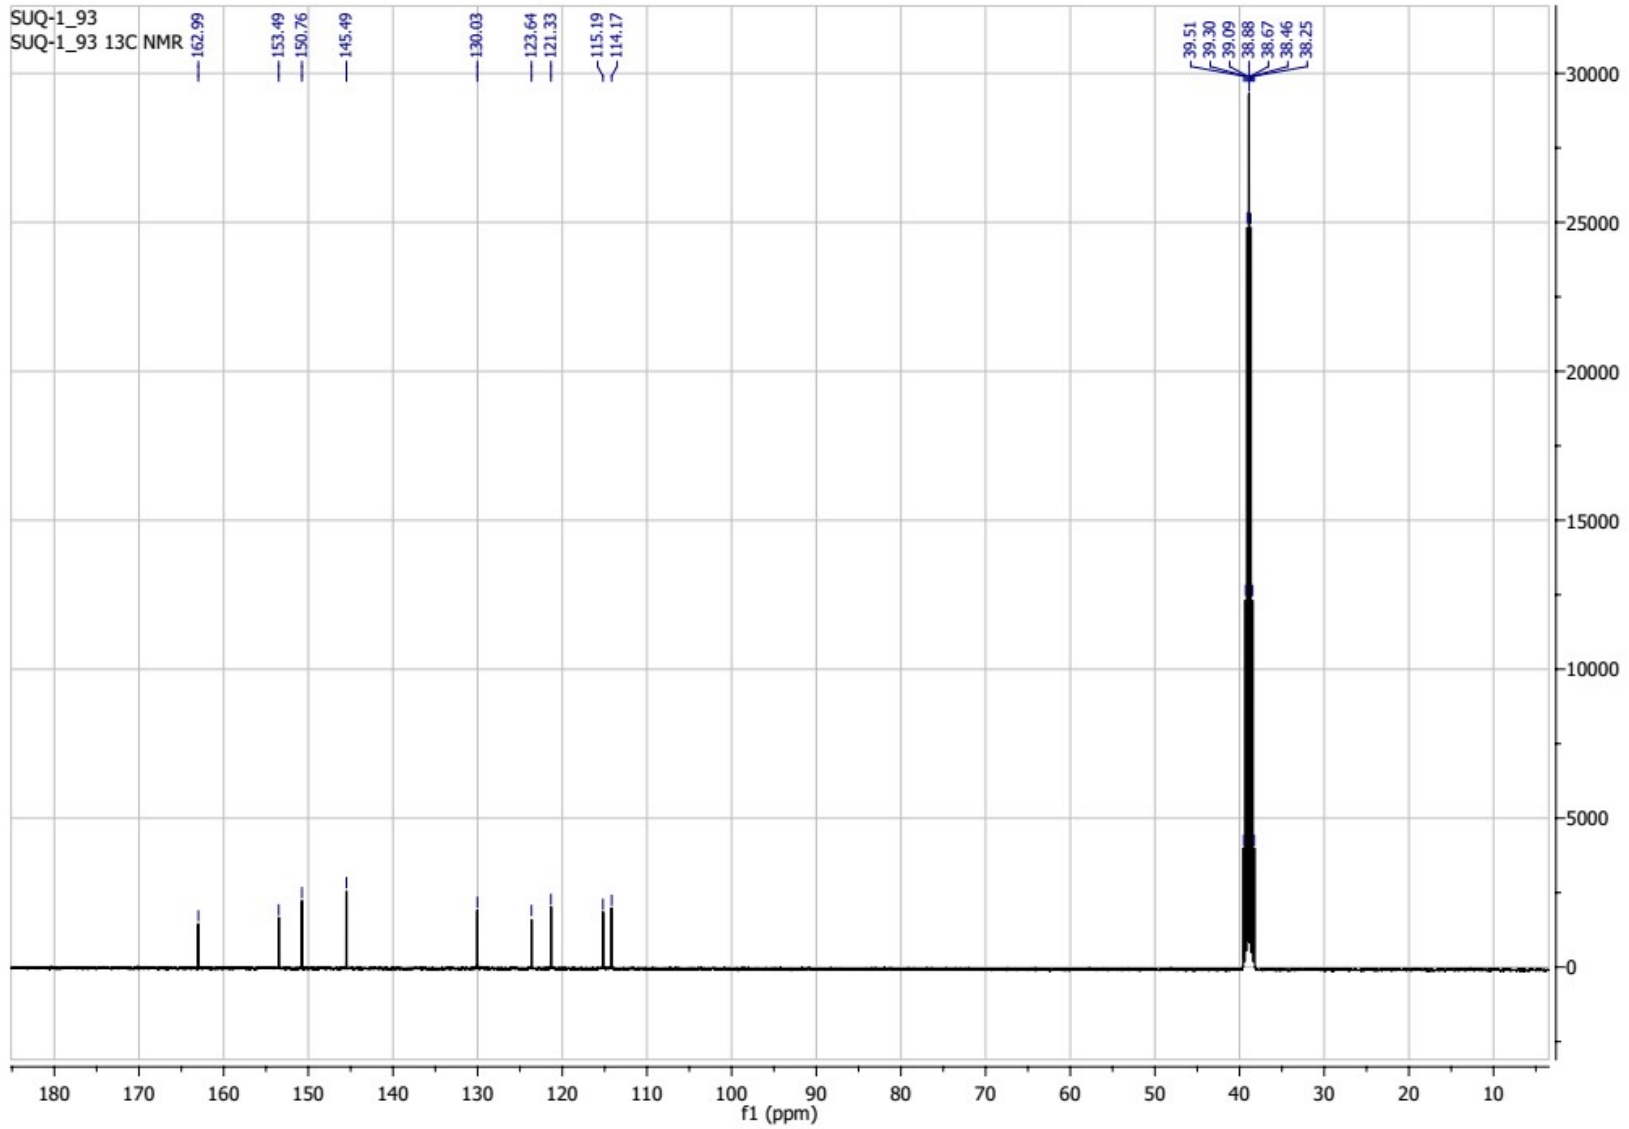

9/1/2020

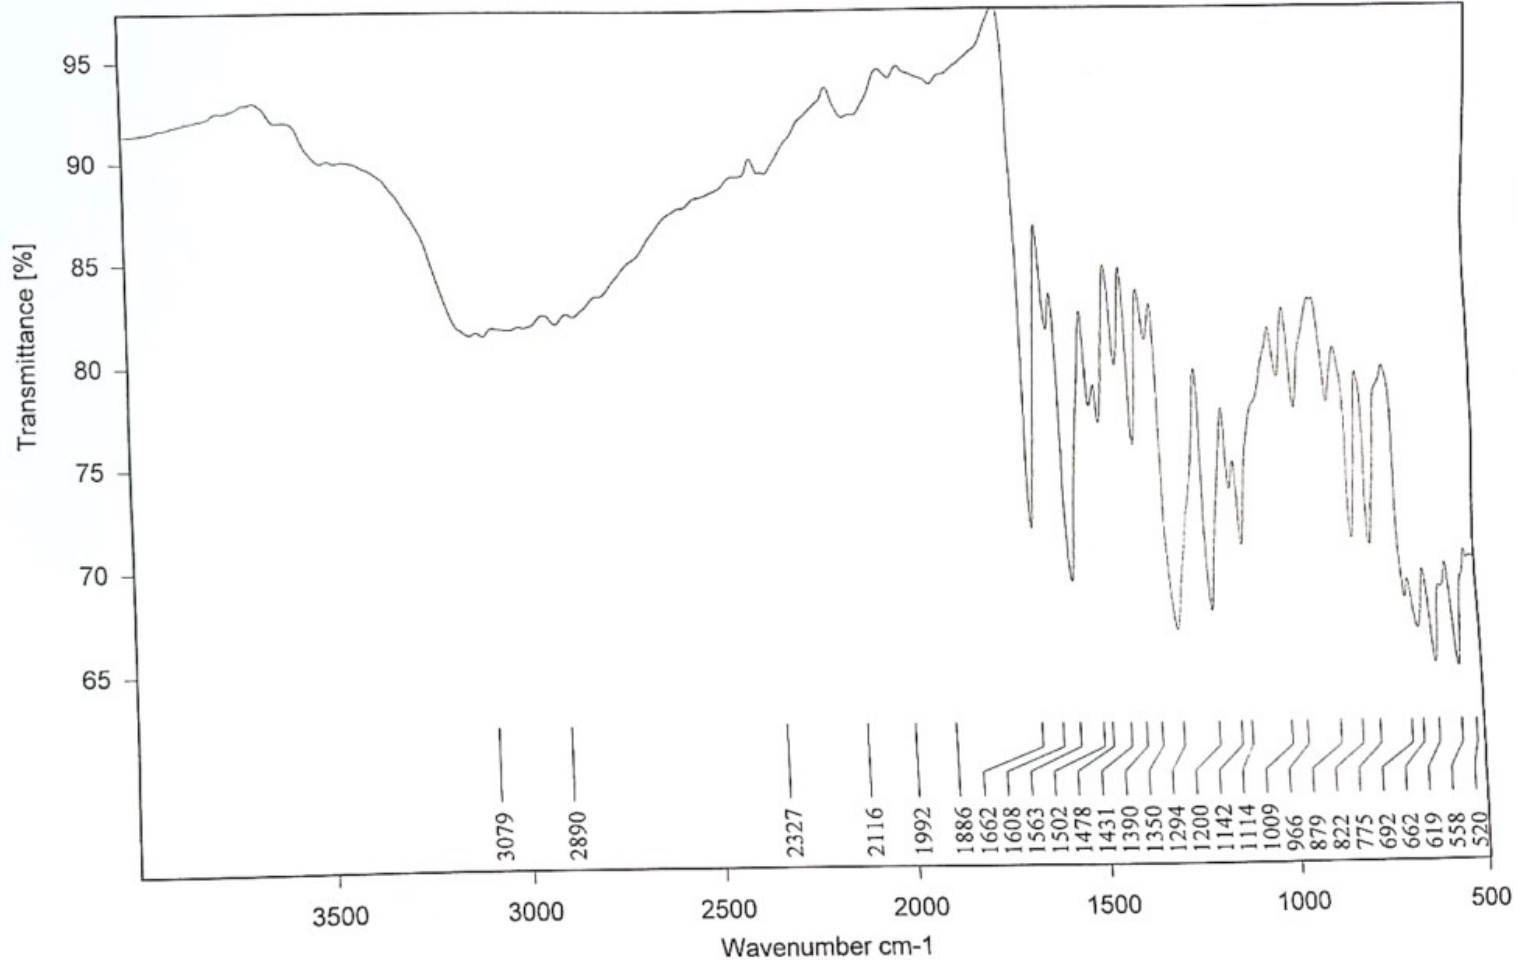

Scanned with CamScanner

|          |        |
|----------|--------|
| CODE NO. | SU-93  |
| MATERIAL | powder |

# Characterization data of Compound 3k:

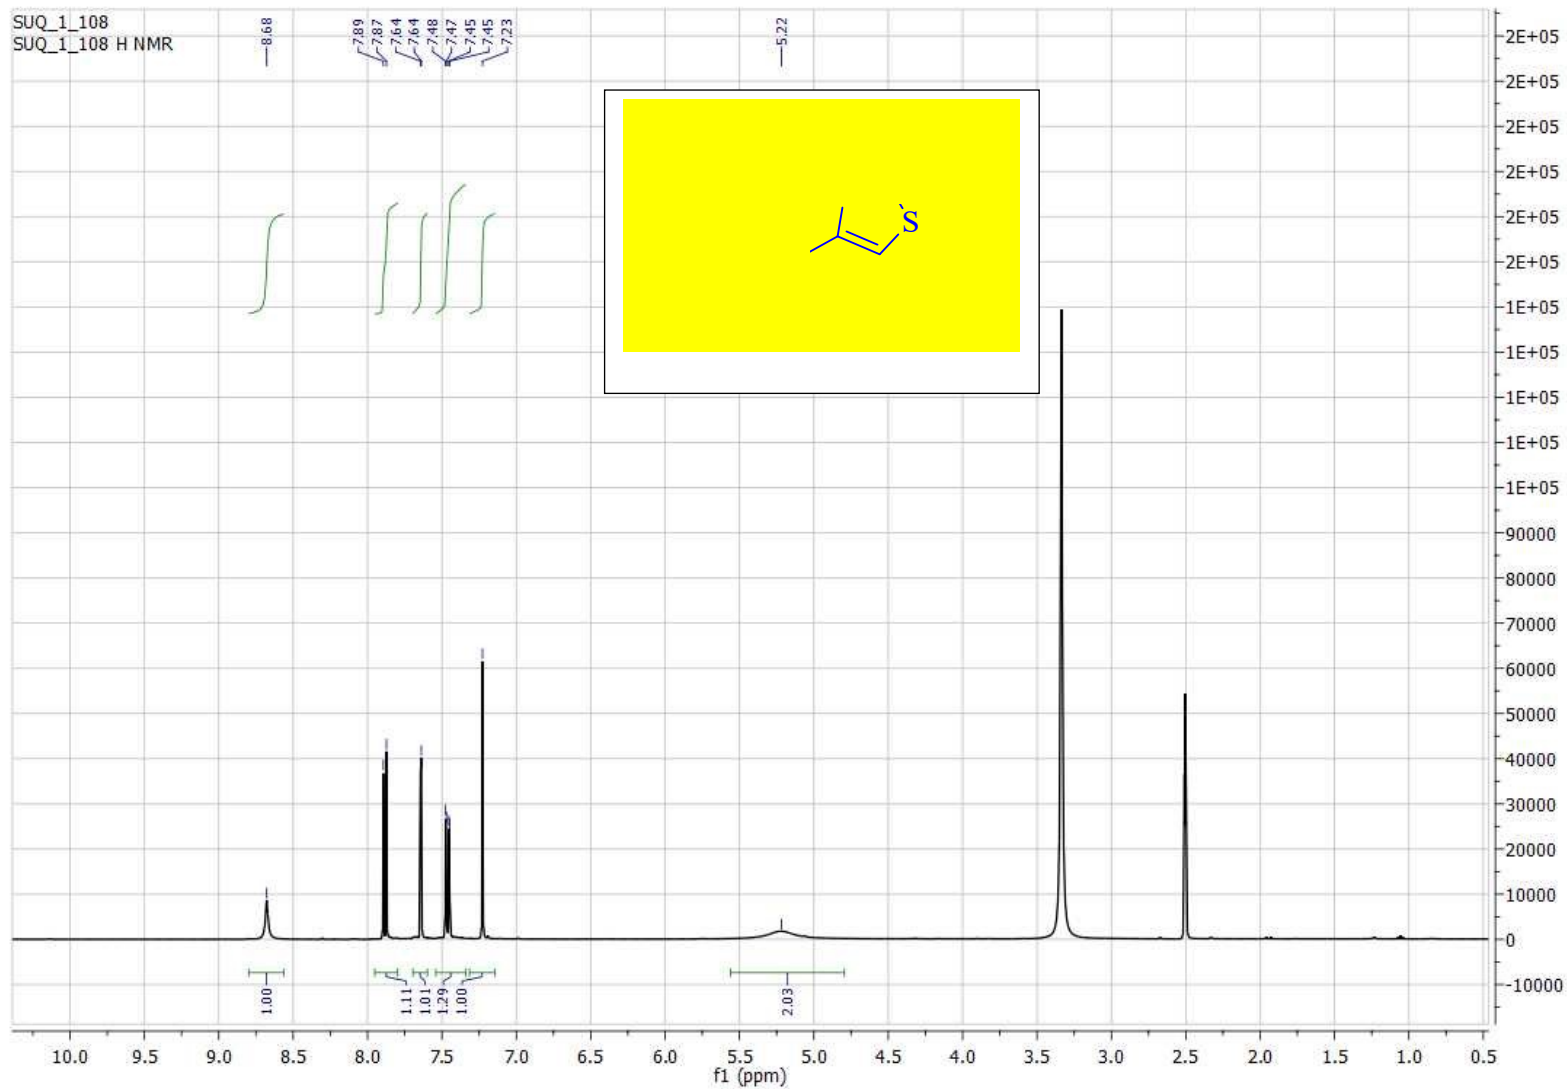

SUQ\_1\_108  
SUQ\_1\_108 H NMR

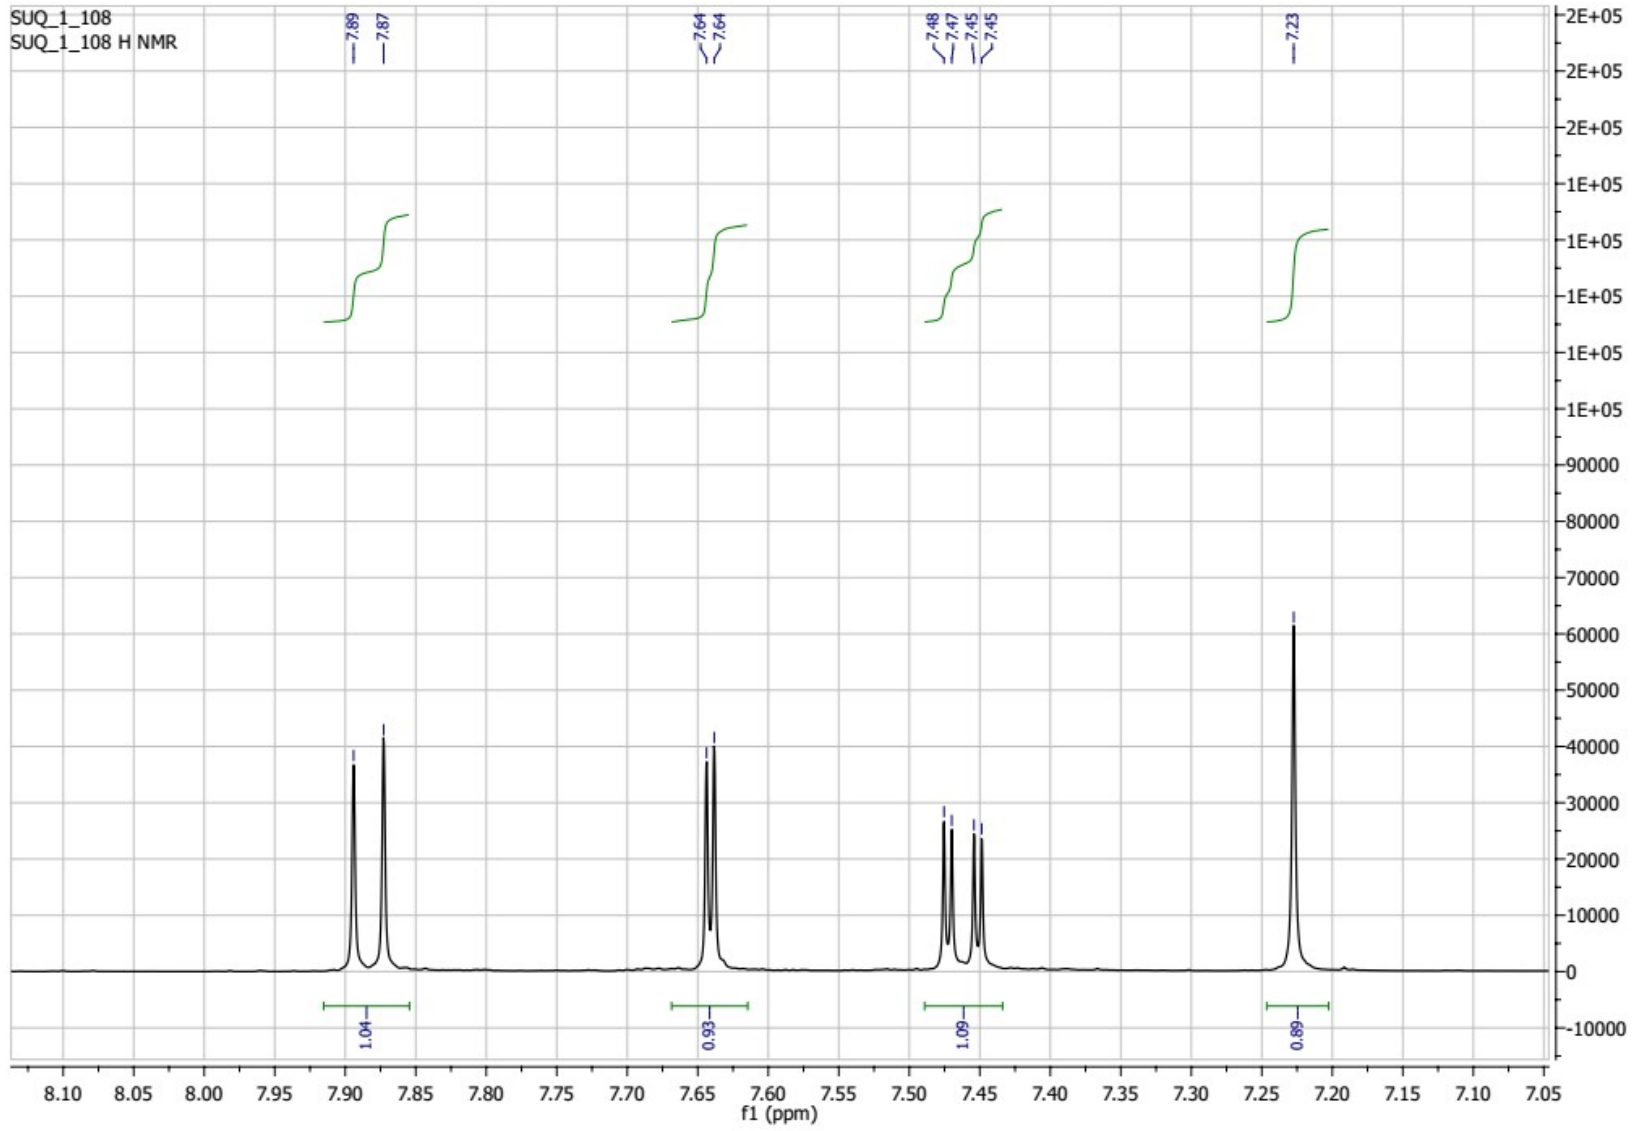

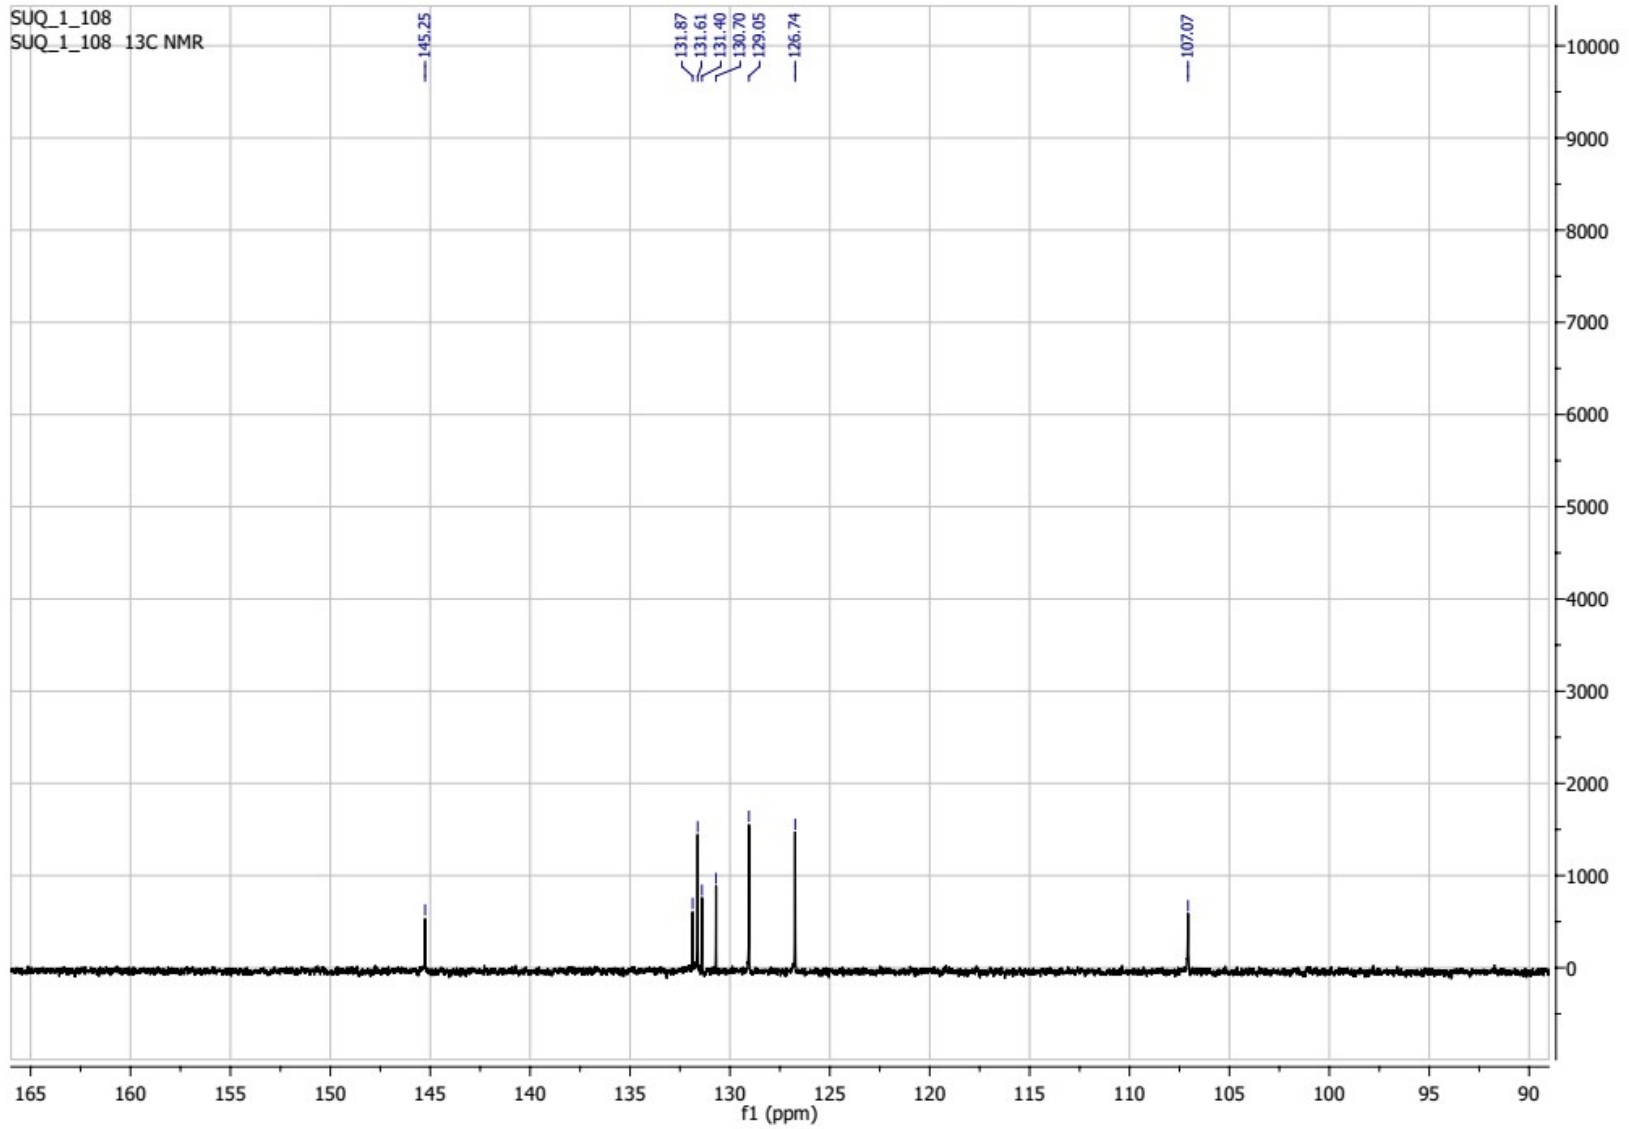

# INDUSTRIAL ANALYTICAL CENTRE

107

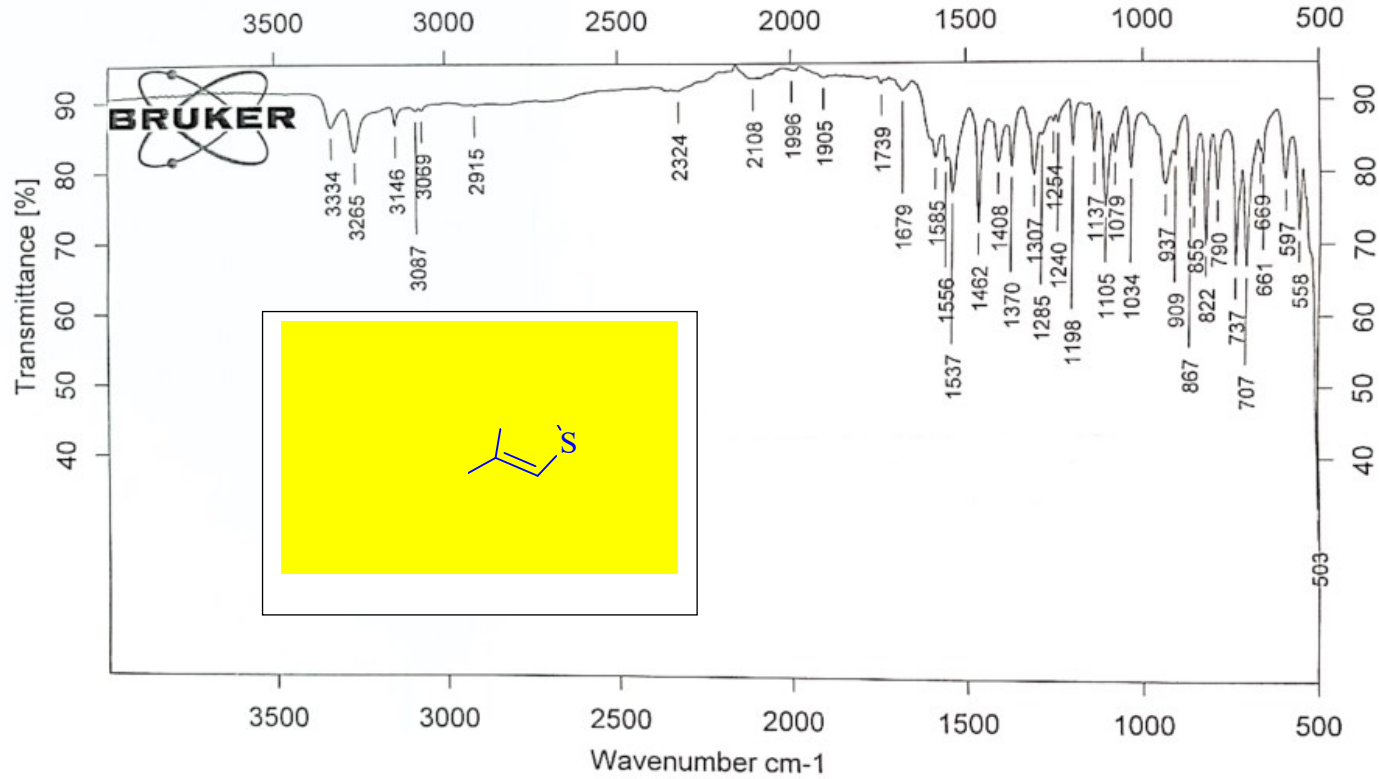

Scanned with CamScanner

SAMPLE SCANS : 12  
DATE : 8/20/2020  
TIME : 10:40:15 AM

SAMPLE : SAMPLE B  
SAMPLE NAME : POWDER  
USER : AYESHA NAZ



# Characterization data of Compound 3l:

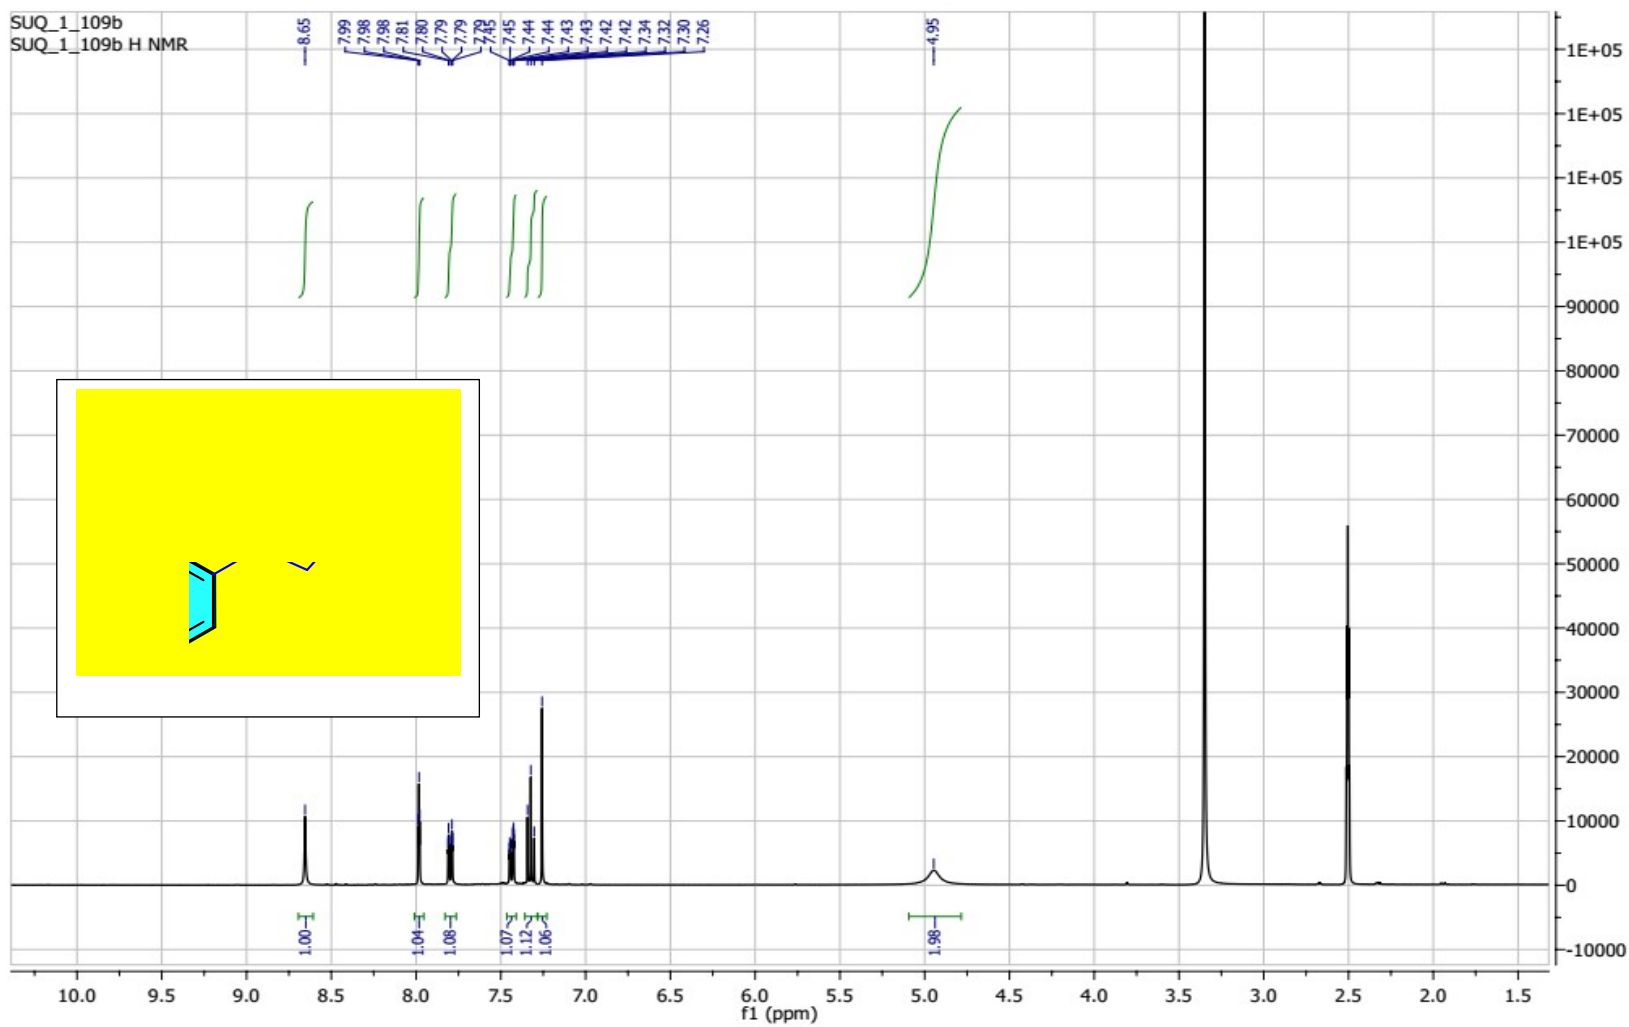

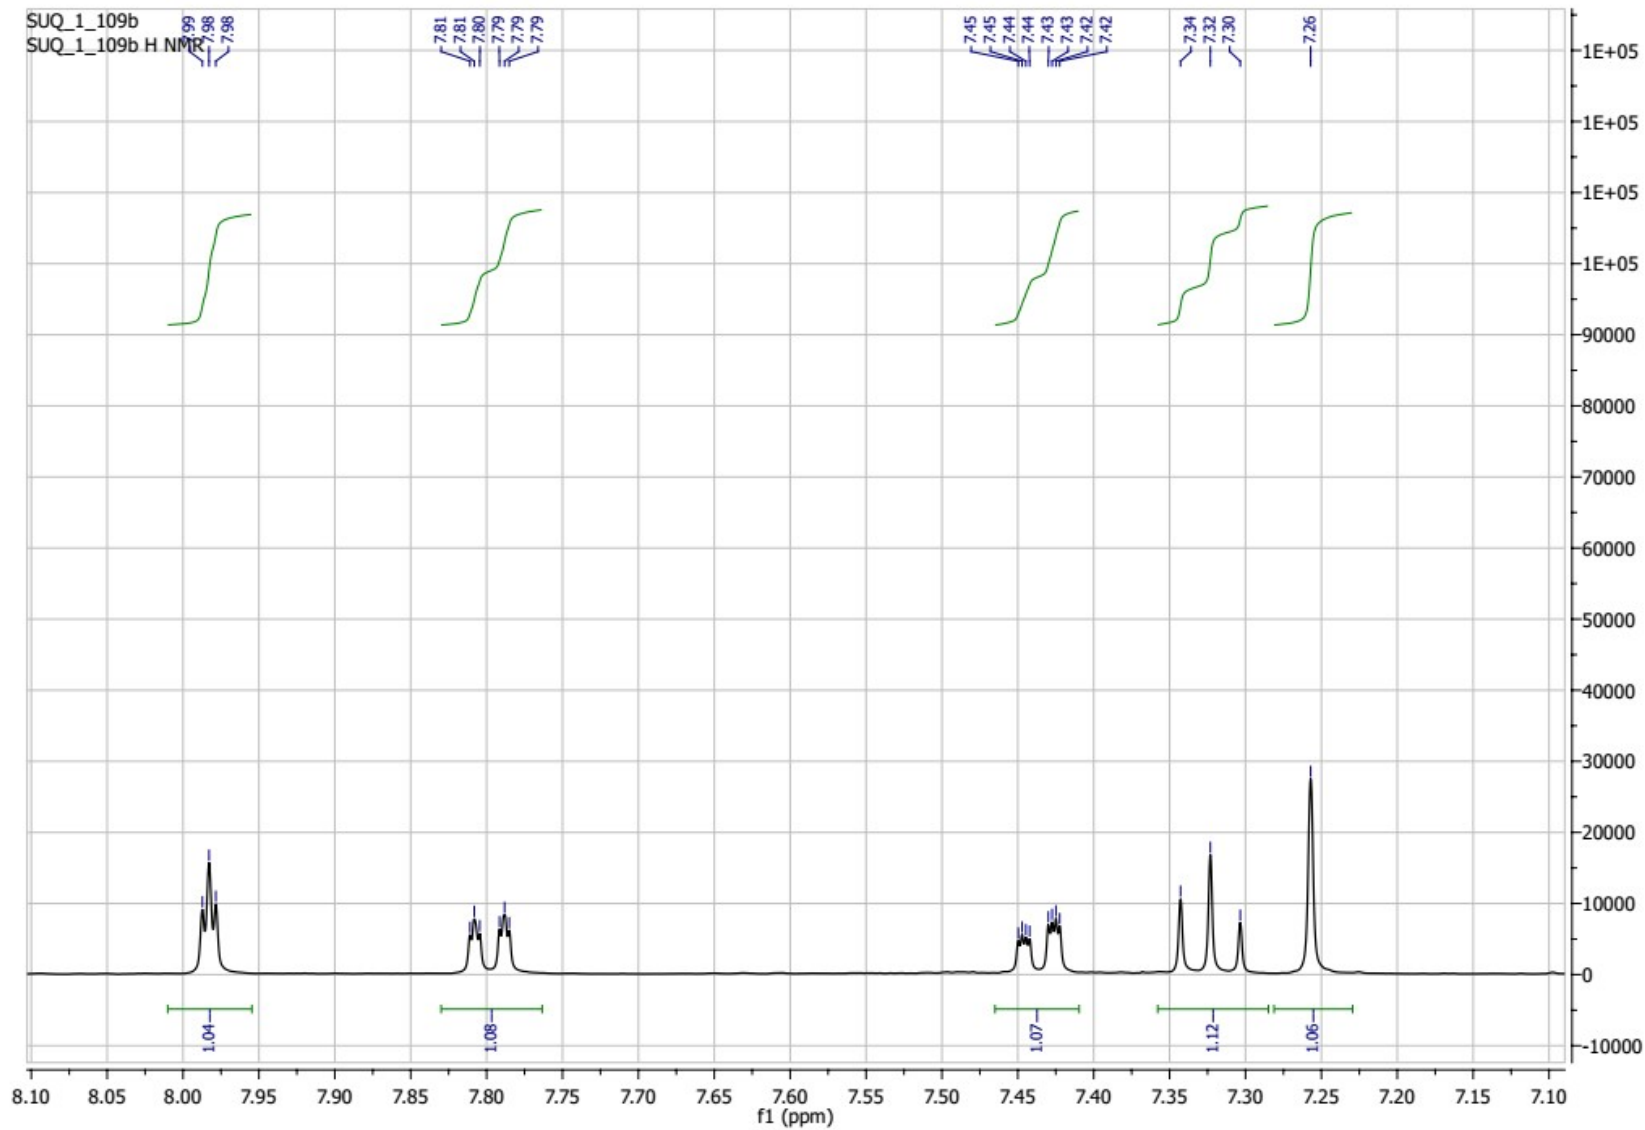

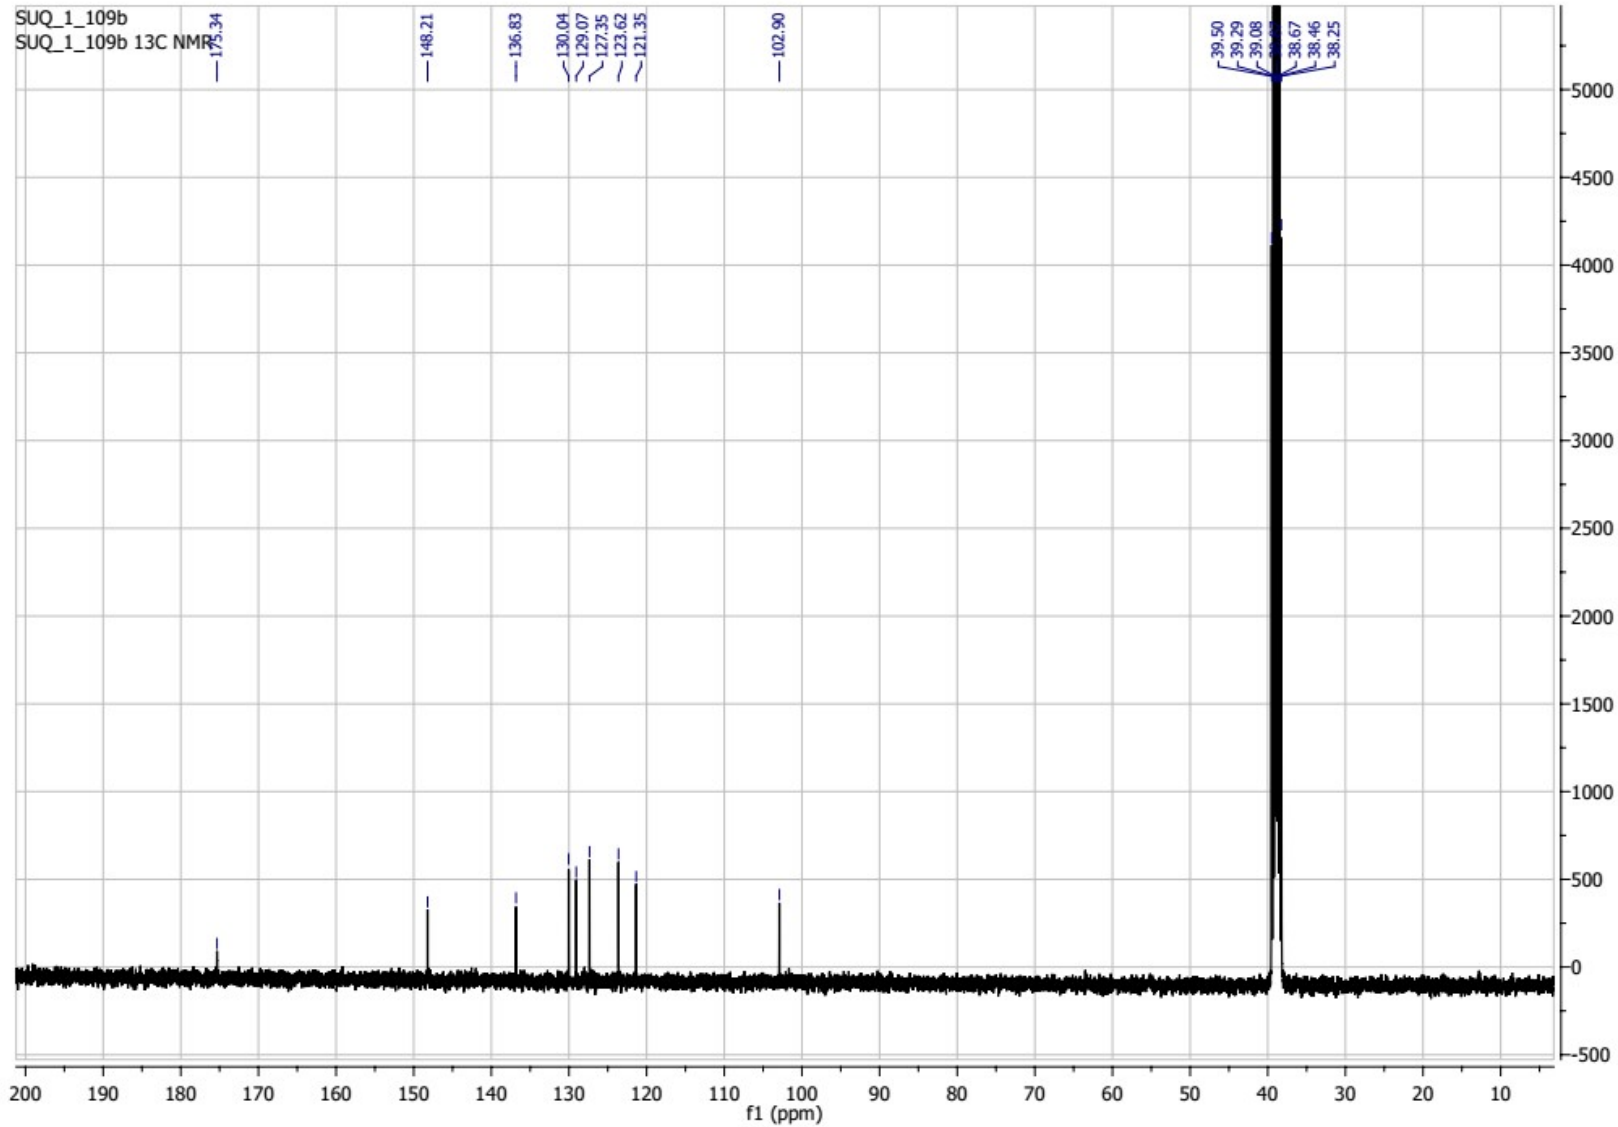

9/1/2020

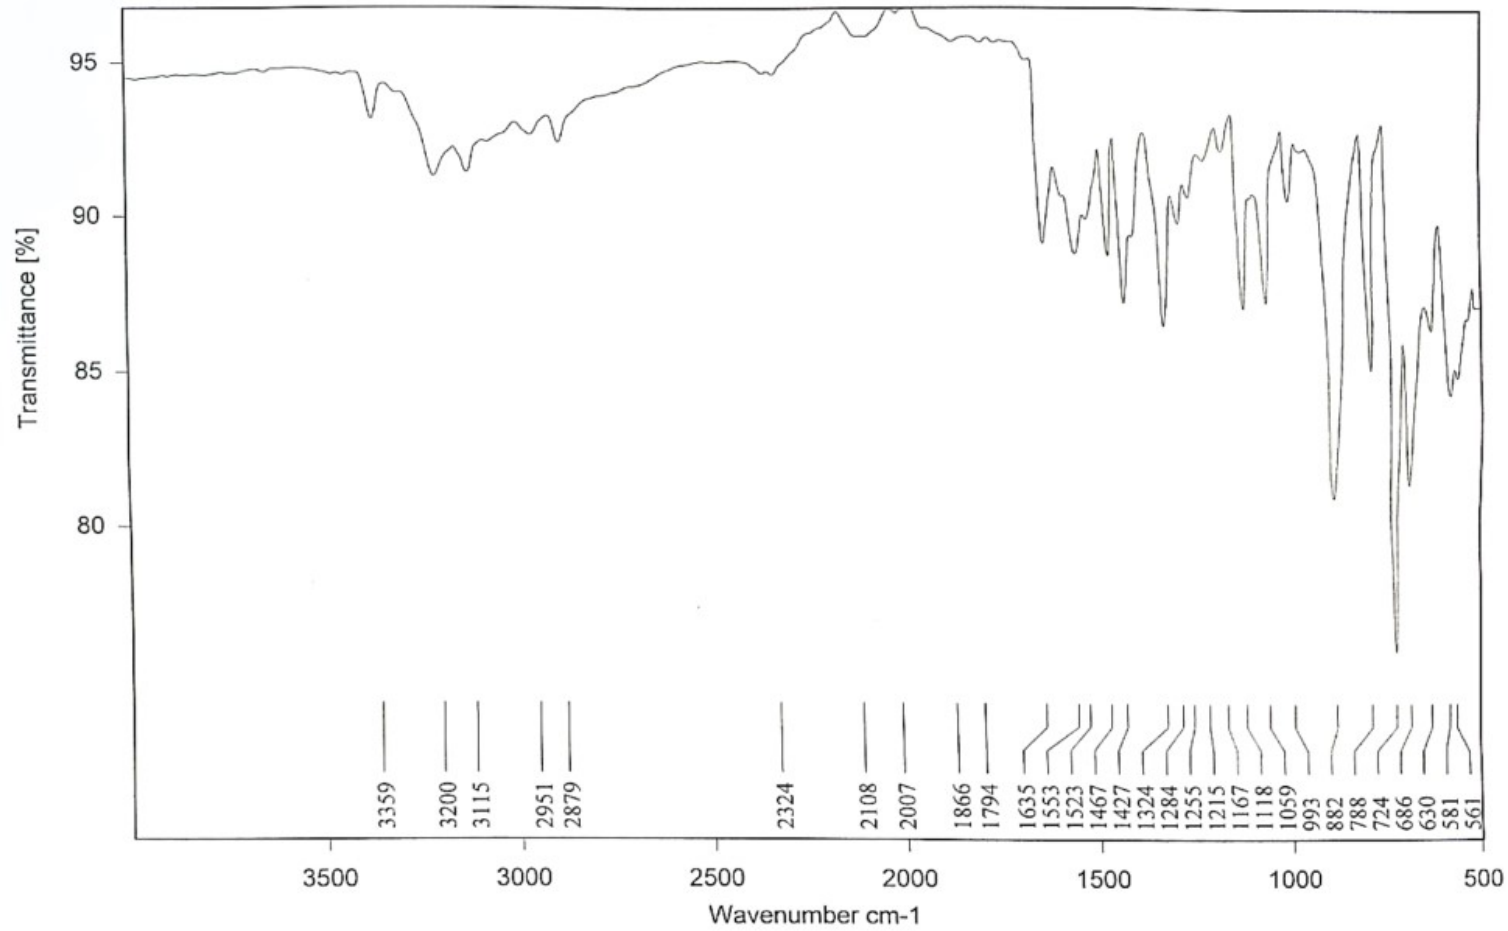

Scanned with CamScanner

|          |         |
|----------|---------|
| CODE NO. | SU-109b |
| MATERIAL | powder  |

# Characterization data of Compound 3m:

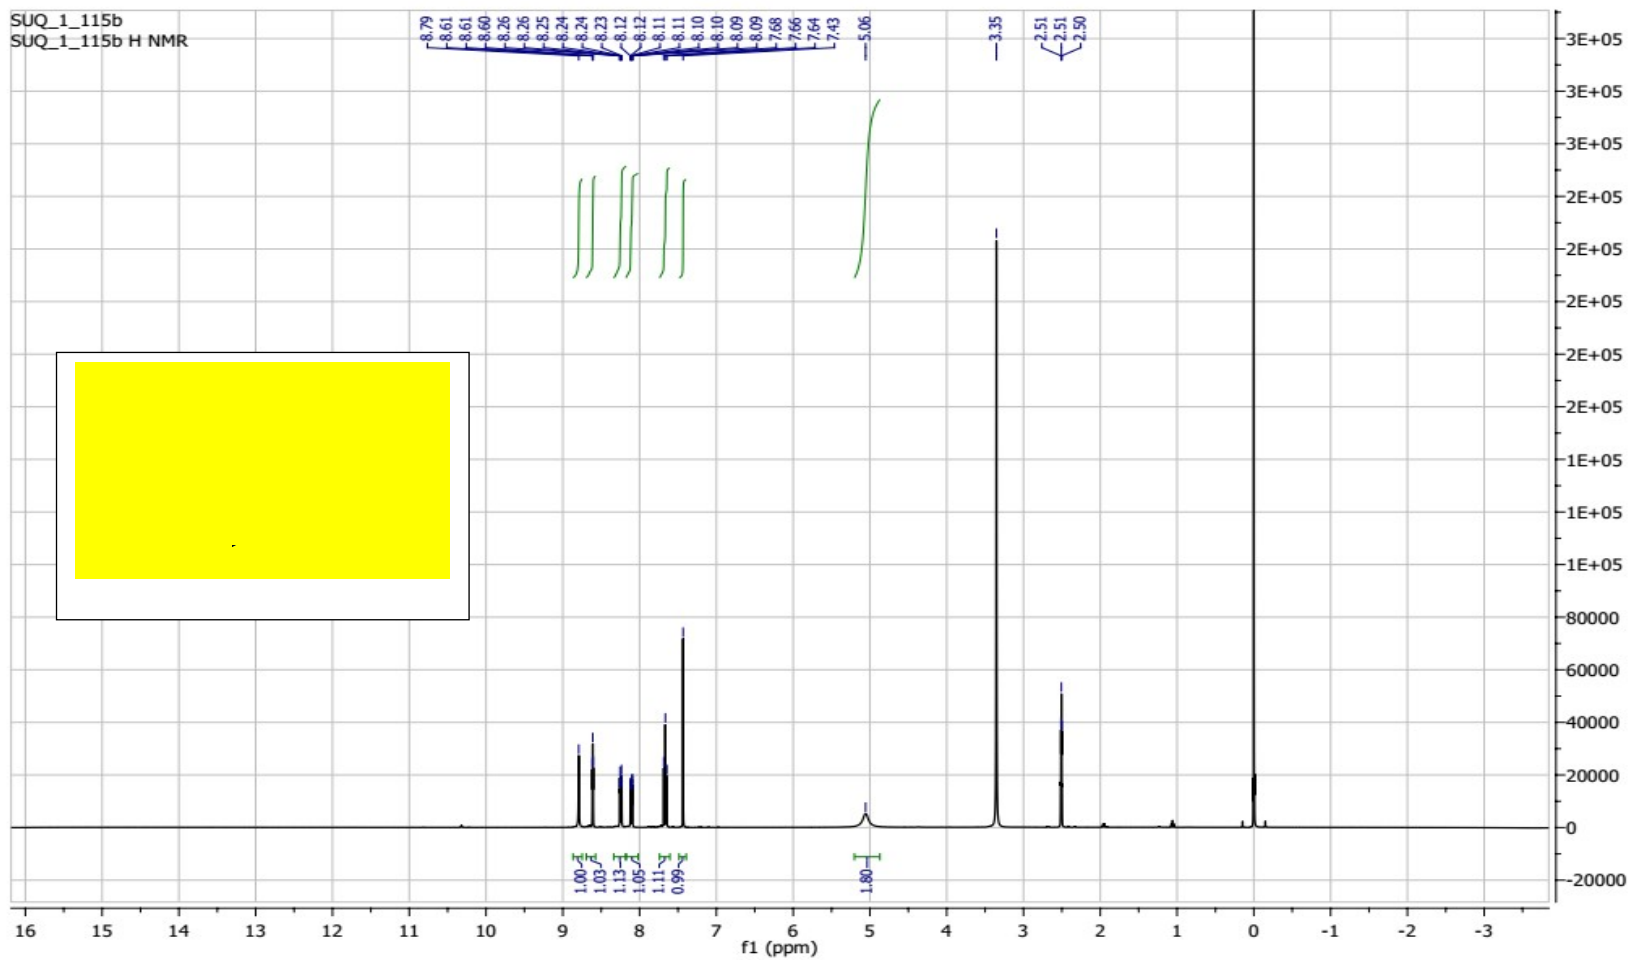

SUQ\_1\_115b  
SUQ\_1\_115b H NMR

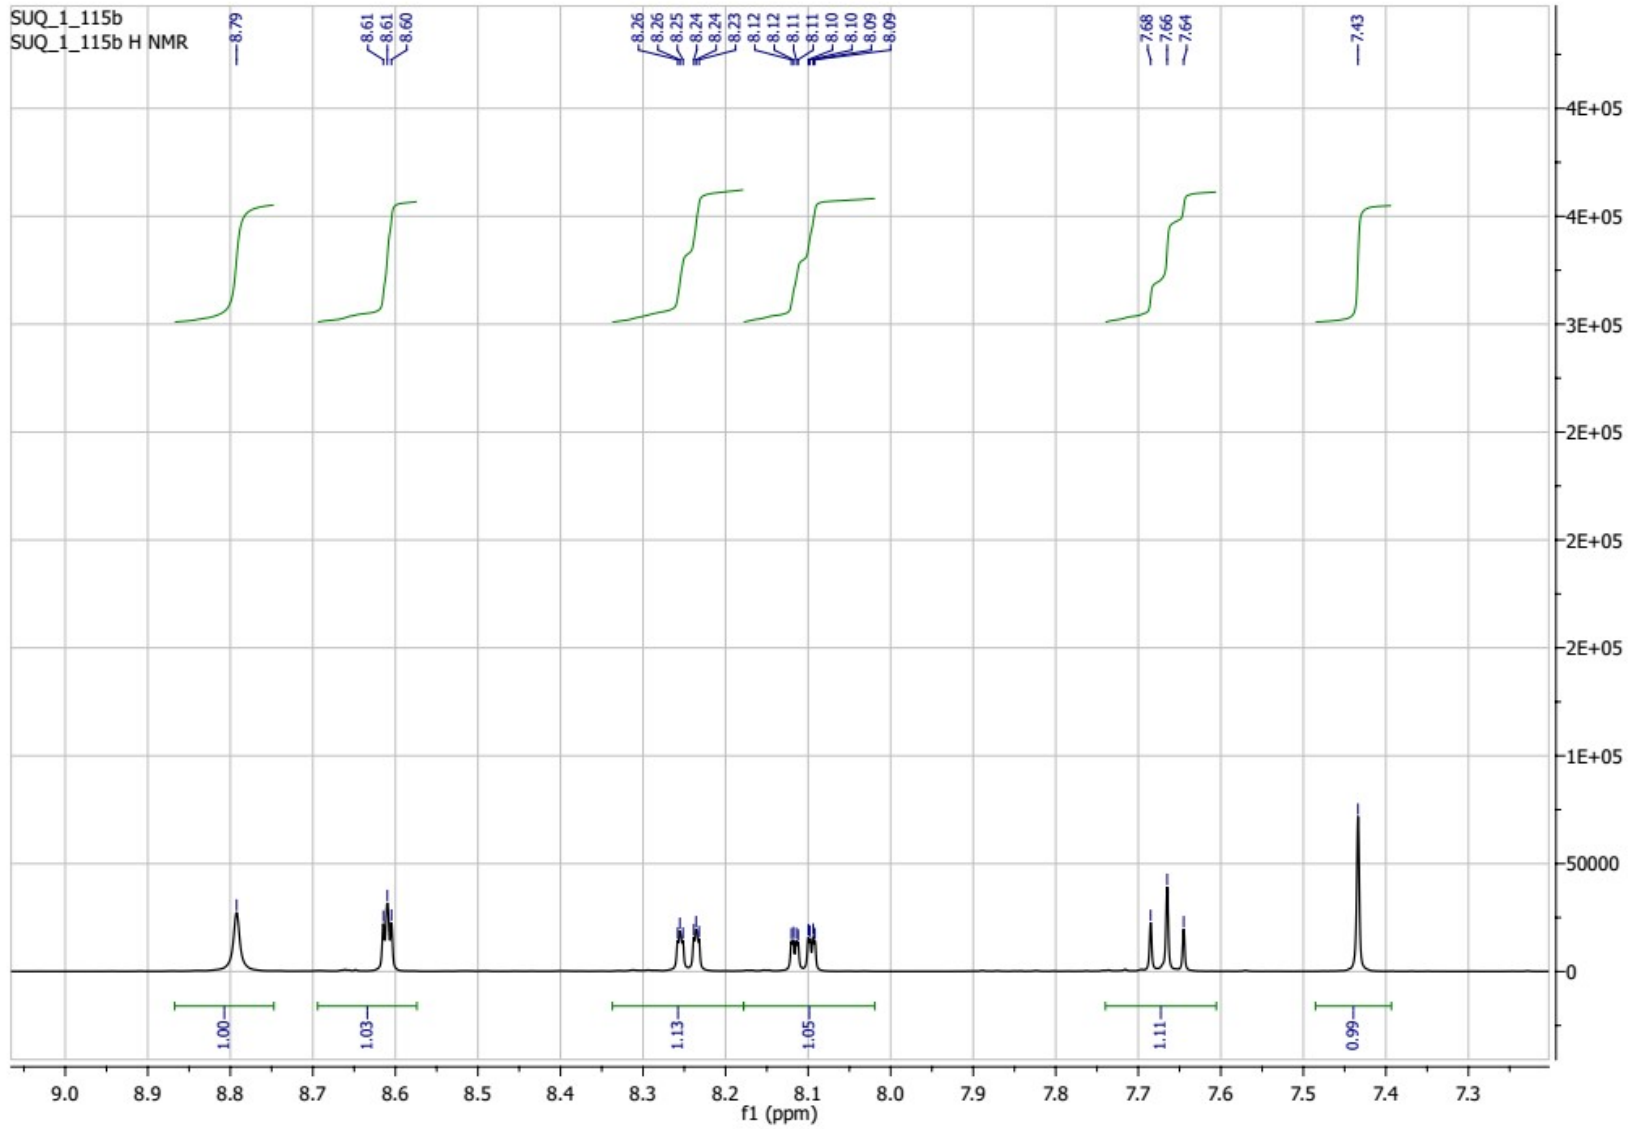

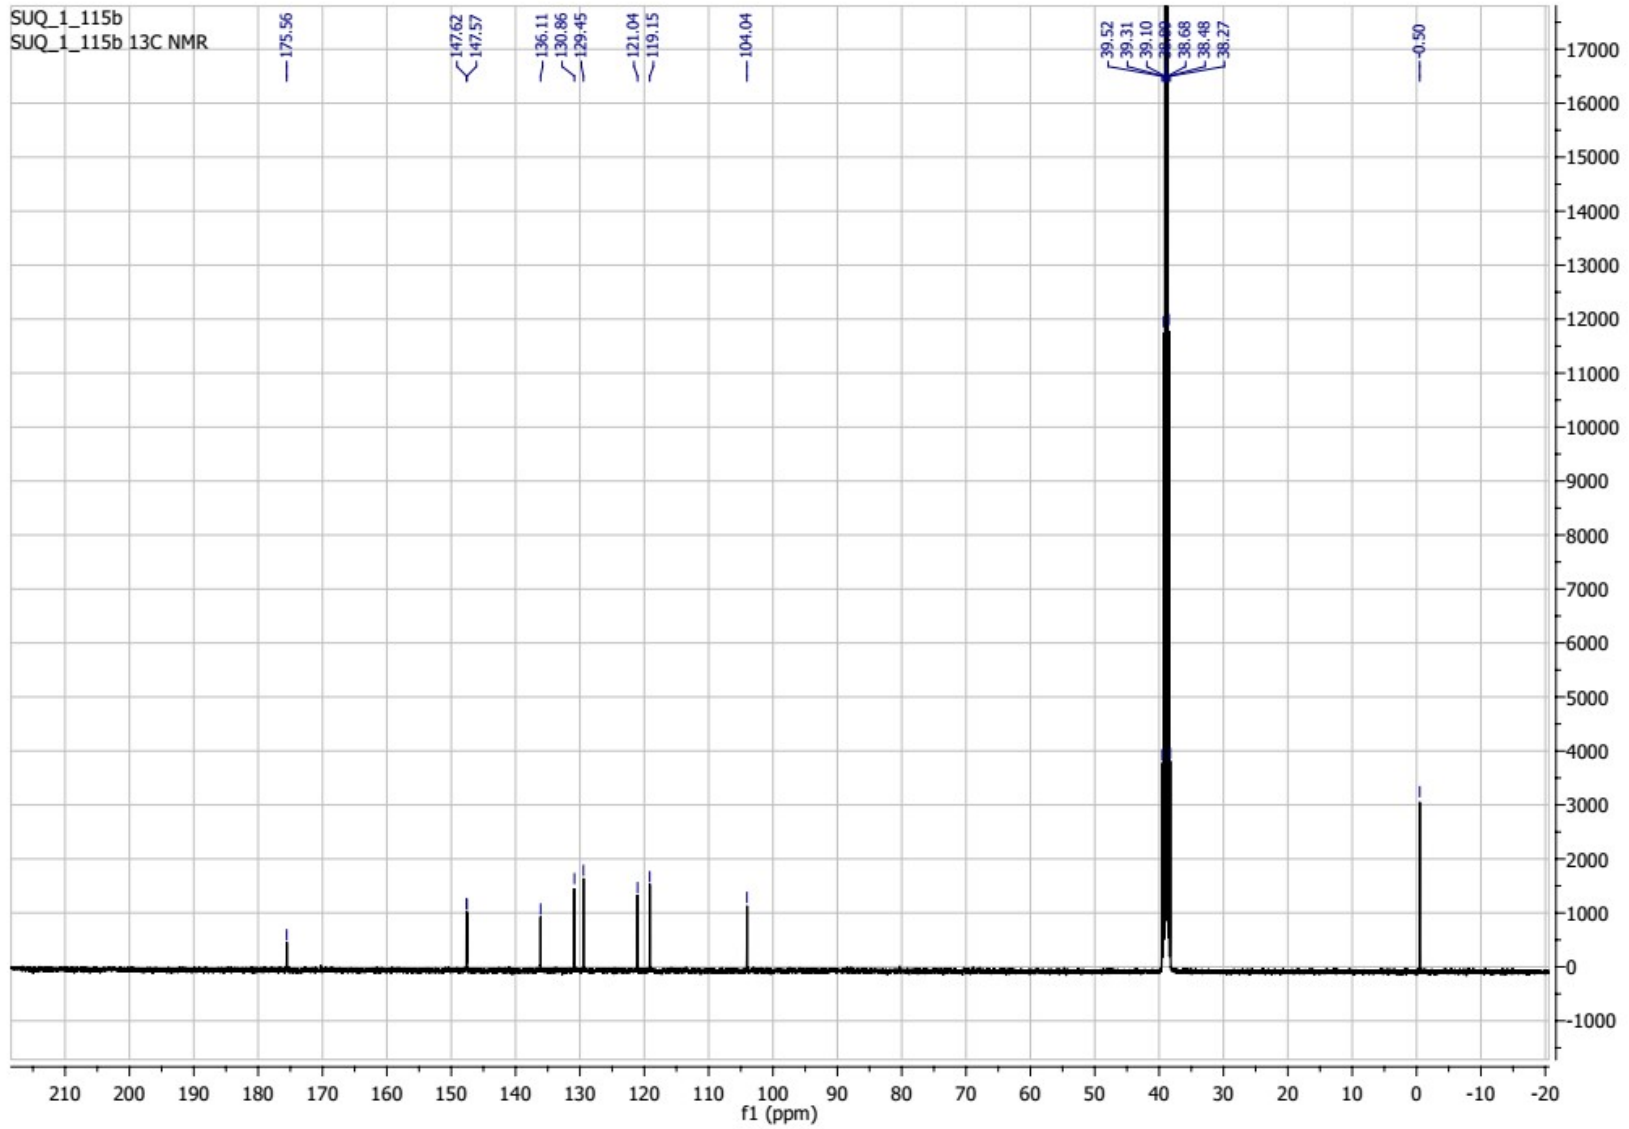

9/1/2020

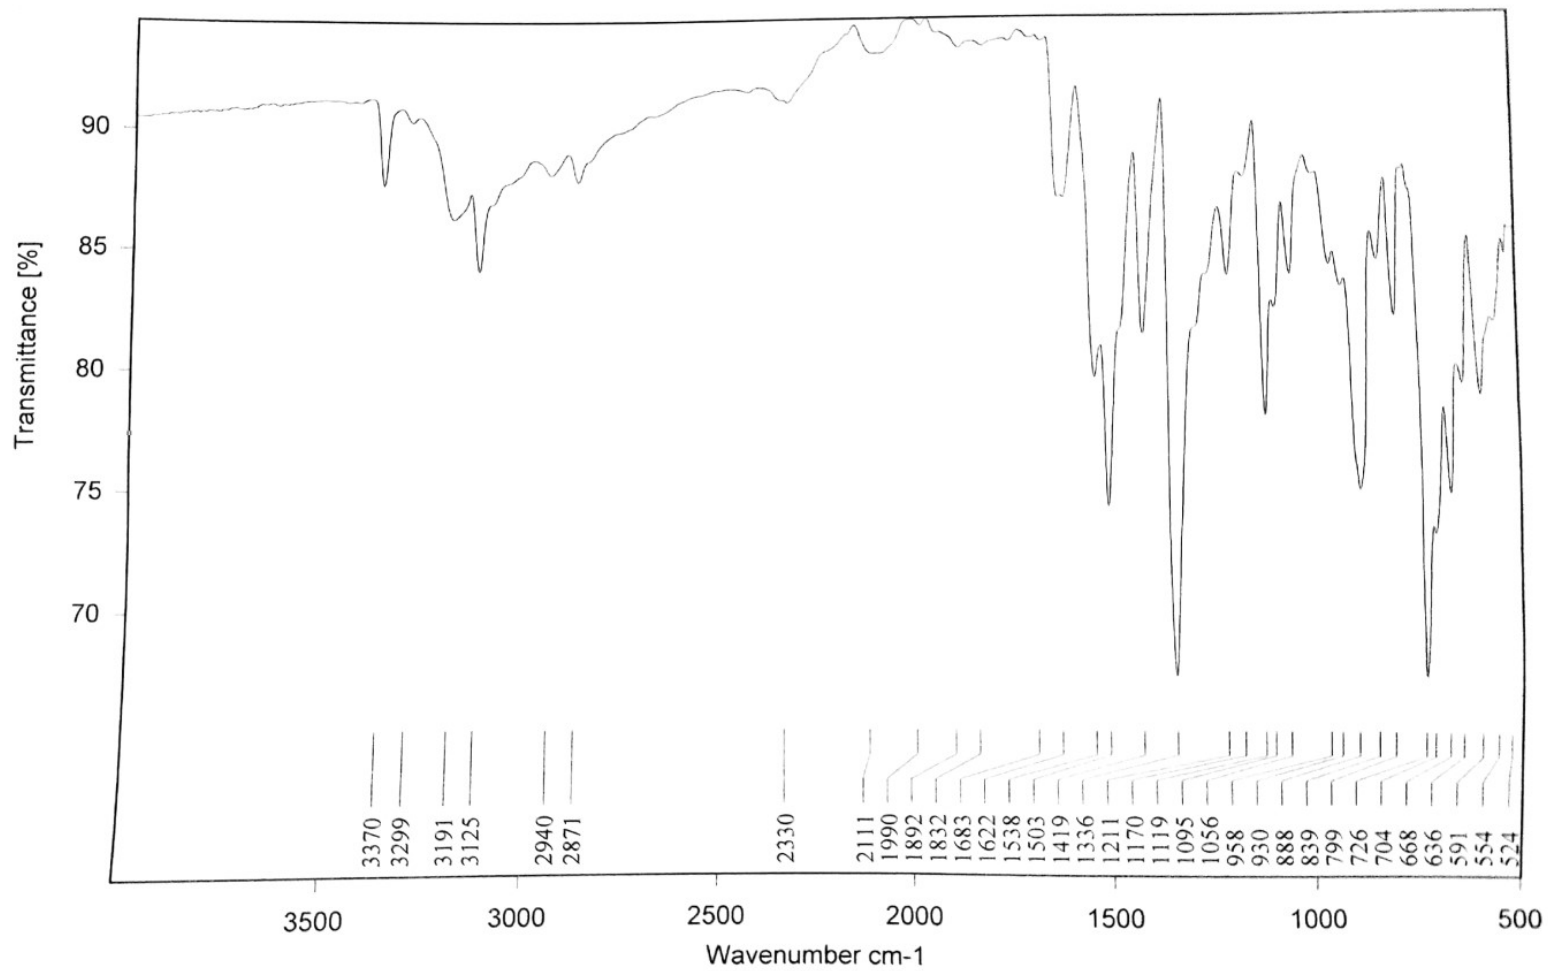

Scanned with CamScanner

CODE NO.  
MATERIAL

SU-115b  
powder
